# Supplementary material
Source: publisher figshare collection journal article supplement (https://gsajournals.figshare.com/ndownloader/files/14209394)
Supplement: Supplementary file 1 [file 14209394]

## Sheet: hsf-1-OE
TABLE S2. List of differentially expressed genes in hsf-1 overexpression strain
Wormbase ID	Gene	Locus	Base Mean	Abs Fold Change	log2 Fold Change	log2 FC SE	Stat	p value	FDR adj p
WBGene00001477	fmo-2	K08C7.5	27.4351	489.421	8.93493	2.46761	3.62088	0.000293598	0.00167925
WBGene00020700	T22F3.11	T22F3.11	74.4823	239.876	7.90615	0.915791	8.63314	5.97e-18	3.21e-16
WBGene00009778	F46C5.1	F46C5.1	13.0913	231.119	7.85249	1.25093	6.27733	3.44e-10	7.04e-09
WBGene00016670	ilys-3	C45G7.3	8.28241	147.767	7.20718	1.69866	4.24287	2.21e-05	0.000174954
WBGene00005228	srh-2	C05E4.14	8.08869	140.097	7.13028	1.28349	5.5554	2.77e-08	4.11e-07
WBGene00016017	C23G10.11	C23G10.11	9.04242	80.5352	6.33155	1.31871	4.80134	1.58e-06	1.66e-05
WBGene00011596	T07G12.5	T07G12.5	30.3559	57.2721	5.83976	0.704731	8.28651	1.17e-16	5.73e-15
WBGene00006650	tts-1	F09E10.11	788.504	53.0516	5.72933	0.357156	16.0415	6.55e-58	6.63e-55
WBGene00016843	C50F7.3	C50F7.3	3.41582	49.3067	5.62371	1.41646	3.97026	7.18e-05	0.000487
WBGene00021006	dct-9	W03F11.3	4.79195	49.2821	5.62299	1.34592	4.1778	2.94e-05	0.000226141
WBGene00013900	ugt-18	ZC443.5	10.4198	46.0985	5.52665	1.11631	4.95082	7.39e-07	8.33e-06
WBGene00010790	sodh-1	K12G11.3	649.095	44.0199	5.46008	0.492044	11.0967	1.3e-28	1.72e-26
WBGene00004397	rol-6	T01B7.7	8.41766	40.629	5.34444	1.12925	4.73272	2.22e-06	2.26e-05
WBGene00015032	B0207.9	B0207.9	2.38415	39.9565	5.32036	1.4817	3.5907	0.000329789	0.0018541
WBGene00016312	C32D5.4	C32D5.4	4.96709	35.2726	5.14048	1.34632	3.81816	0.00013445	0.000845483
WBGene00021873	clec-82	Y54G2A.8	8.13982	34.8084	5.12136	1.12933	4.53486	5.76e-06	5.35e-05
WBGene00021016	W03G9.5	W03G9.5	2.01712	34.218	5.09668	1.53089	3.32923	0.00087087	0.0042426
WBGene00007851	clec-245	C31G12.2	2.00871	34.0992	5.09167	1.55634	3.27156	0.00106957	0.00505597
WBGene00044206	T26H5.9	T26H5.9	23.957	31.2984	4.96802	0.642298	7.73475	1.04e-14	3.98e-13
WBGene00005016	sqt-1	B0491.2	1.8149	30.5725	4.93416	1.59687	3.08989	0.00200232	0.00858524
WBGene00018731	F53A9.8	F53A9.8	249.767	28.6268	4.8393	0.431958	11.2032	3.93e-29	5.24e-27
WBGene00009983	cut-2	F53F1.5	2.45445	28.4622	4.83097	1.46729	3.29246	0.000993164	0.00474804
WBGene00018119	F36H12.3	F36H12.3	7.49773	28.2863	4.82203	1.13076	4.26441	2e-05	0.000160326
WBGene00019549	K09C4.4	K09C4.4	3.16855	28.1887	4.81705	1.41914	3.39433	0.000687958	0.00347969
WBGene00009226	cyp-37B1	F28G4.1	27.5048	27.4147	4.77688	0.791555	6.0348	1.59e-09	2.94e-08
WBGene00009446	F35H8.1	F35H8.1	1.83161	26.6607	4.73664	1.55797	3.04026	0.00236375	0.00985371
WBGene00021373	Y37E11AR.7	Y37E11AR.7	2.01356	26.6399	4.73552	1.52348	3.10836	0.00188126	0.00814908
WBGene00021878	Y54G2A.13	Y54G2A.13	12.653	26.4057	4.72278	0.917031	5.15007	2.6e-07	3.22e-06
WBGene00017672	F21F3.2	F21F3.2	3.55786	26.3081	4.71743	1.40297	3.36246	0.000772515	0.00384332
WBGene00011669	T09F5.10	T09F5.10	3.25778	25.462	4.67028	1.40136	3.33268	0.000860131	0.00420207
WBGene00018122	ttbk-2	F36H12.8	1.72598	24.7104	4.62704	1.58022	2.9281	0.00341035	0.0133545
WBGene00022699	ZK353.3	ZK353.3	1.57565	24.6138	4.62139	1.63472	2.82703	0.00469818	0.0174817
WBGene00008001	C38C10.3	C38C10.3	3.00467	24.4324	4.61072	1.42021	3.24651	0.00116829	0.00542795
WBGene00022634	ZC581.7	ZC581.7	3.96146	23.5206	4.55586	1.3837	3.29252	0.000992938	0.00474804
WBGene00011172	R09E10.2	R09E10.2	22.9205	23.4591	4.55207	0.562608	8.09102	5.92e-16	2.6e-14
WBGene00006040	ssp-11	T28H11.6	1.99372	22.9104	4.51793	1.61189	2.80287	0.00506494	0.0186046
WBGene00019405	K05F1.1	K05F1.1	1.56099	22.8763	4.51578	1.66993	2.70418	0.0068473	0.0237128
WBGene00009805	F47B8.4	F47B8.4	7.36519	22.4166	4.4865	1.00915	4.44583	8.76e-06	7.76e-05
WBGene00013988	ZK512.10	ZK512.10	2.8903	21.4558	4.4233	1.43195	3.08901	0.00200826	0.00859858
WBGene00020016	lipl-3	R11G11.14	20.0808	20.1064	4.32958	0.59628	7.26099	3.84e-13	1.19e-11
WBGene00020984	W03D8.1	W03D8.1	3.08771	19.6292	4.29493	1.46445	2.93279	0.00335932	0.0131819
WBGene00014168	ZK945.6	ZK945.6	3.24102	19.5645	4.29017	1.39825	3.06825	0.00215318	0.00912374
WBGene00017554	nep-9	F18A12.5	2.75219	19.5395	4.28832	1.42956	2.99975	0.002702	0.011027
WBGene00017205	F07C4.12	F07C4.12	4.13282	19.2171	4.26432	1.23759	3.44567	0.000569637	0.00296829
WBGene00011954	T23F11.2	T23F11.2	7.76573	18.8569	4.23702	0.966032	4.386	1.15e-05	9.86e-05
WBGene00017998	F33D4.6	F33D4.6	2.57853	18.6477	4.22093	1.48405	2.84419	0.00445246	0.016719
WBGene00044122	T28B8.6	T28B8.6	2.405	18.5698	4.21489	1.51936	2.77412	0.00553516	0.01997
WBGene00020987	W03D8.5	W03D8.5	3.13619	18.5389	4.21249	1.40237	3.00383	0.00266605	0.0108943
WBGene00005657	srr-6	C13D9.1	9.24974	18.2708	4.19147	0.880377	4.76099	1.93e-06	2e-05
WBGene00008905	F17B5.1	F17B5.1	6.40337	18.2405	4.18907	1.02091	4.10329	4.07e-05	0.000298295
WBGene00016288	C31H1.5	C31H1.5	11.8724	17.9984	4.1698	0.764494	5.45433	4.92e-08	6.98e-07
WBGene00005013	jmjd-1.1	F43G6.6	2.77387	17.511	4.13019	1.45541	2.83783	0.00454217	0.0170138
WBGene00008153	C47E12.10	C47E12.10	1.77773	17.1504	4.10017	1.64464	2.49305	0.0126652	0.0395193
WBGene00044510	K07H8.11	K07H8.11	1.89238	17.0822	4.09442	1.60747	2.54712	0.0108616	0.0348098
WBGene00009470	F36D3.4	F36D3.4	26.899	16.9012	4.07905	0.503008	8.10933	5.09e-16	2.26e-14
WBGene00022467	Y119C1B.1	Y119C1B.1	4.57956	16.8534	4.07497	1.2218	3.33523	0.000852294	0.00417093
WBGene00001067	dpy-5	F27C1.8	2.43976	16.7505	4.06613	1.57482	2.58196	0.0098241	0.0321481
WBGene00004963	spe-9	C17D12.6	2.56426	16.5663	4.05018	1.45891	2.77617	0.00550036	0.0198909
WBGene00012636	Y38H8A.2	Y38H8A.2	2.32321	16.566	4.05016	1.51451	2.67424	0.00748995	0.0255801
WBGene00014238	ZK1225.4	ZK1225.4	6.16988	16.5179	4.04596	0.999931	4.04623	5.2e-05	0.000365472
WBGene00007337	C05C12.5	C05C12.5	12.2328	16.2773	4.02479	0.72002	5.58983	2.27e-08	3.43e-07
WBGene00000748	col-175	C35B8.1	2.75012	15.7105	3.97366	1.52051	2.61336	0.00896557	0.0297623
WBGene00011530	T06D8.10	T06D8.10	2.5265	15.6222	3.96553	1.46019	2.71576	0.00661228	0.0230573
WBGene00021072	W07B8.4	W07B8.4	2.42833	15.5947	3.96298	1.48882	2.66183	0.00777177	0.0264059
WBGene00018001	F33D11.2	F33D11.2	2.29787	15.5852	3.9621	1.48713	2.66426	0.0077157	0.026233
WBGene00019216	H20J04.1	H20J04.1	1.8927	15.5432	3.95821	1.55906	2.53885	0.0111218	0.035499
WBGene00011257	npax-3	R13.2	1.51968	15.204	3.92638	1.64165	2.39173	0.0167691	0.0495529
WBGene00003473	mtl-1	K11G9.6	76.8811	15.0195	3.90877	0.480065	8.14217	3.88e-16	1.75e-14
WBGene00018253	F40H6.1	F40H6.1	7.67057	14.938	3.90091	0.884936	4.40813	1.04e-05	9.04e-05
WBGene00009941	F52F12.8	F52F12.8	3.40442	14.8201	3.88949	1.25514	3.09885	0.00194272	0.00837468
WBGene00007563	C14A4.13	C14A4.13	4.0968	14.8145	3.88894	1.24481	3.12413	0.00178333	0.00776922
WBGene00015917	C17G10.3	C17G10.3	5.73644	14.7293	3.88061	1.0128	3.83157	0.000127327	0.000807045
WBGene00077699	C45B11.8	C45B11.8	2.14139	14.7098	3.87871	1.55884	2.4882	0.0128391	0.0399631
WBGene00012871	Y45F10B.3	Y45F10B.3	2.07731	14.6688	3.87468	1.50108	2.58126	0.00984407	0.0321857
WBGene00021525	Y41D4B.26	Y41D4B.26	4.43025	14.5925	3.86716	1.38758	2.78699	0.00532008	0.0193683
WBGene00017910	F28H1.5	F28H1.5	2.37683	14.5922	3.86712	1.53502	2.51927	0.0117598	0.0371602
WBGene00016413	C34F11.1	C34F11.1	1.83962	14.5621	3.86415	1.56442	2.47002	0.0135106	0.0416347
WBGene00011134	ssp-33	R08A2.3	4.15373	14.3341	3.84138	1.23946	3.09924	0.00194019	0.00837089
WBGene00004962	spe-8	F53G12.6	4.52069	14.3243	3.8404	1.25007	3.07214	0.00212531	0.00902337
WBGene00010915	M110.7	M110.7	3.93422	14.1596	3.8237	1.23965	3.08451	0.00203887	0.00871225
WBGene00018531	F47B3.7	F47B3.7	7.64334	14.1139	3.81905	0.889541	4.29328	1.76e-05	0.000143473
WBGene00008383	D1081.5	D1081.5	3.95328	14.1102	3.81867	1.22811	3.10938	0.00187483	0.00812355
WBGene00012115	T28B8.4	T28B8.4	12.3365	13.9778	3.80507	0.715648	5.31695	1.06e-07	1.41e-06
WBGene00020372	T09A12.1	T09A12.1	3.46984	13.8701	3.7939	1.27692	2.97114	0.00296696	0.0118757
WBGene00018980	F56F4.3	F56F4.3	4.31728	13.795	3.78608	1.22346	3.09457	0.00197101	0.00847976
WBGene00007793	C28D4.5	C28D4.5	10.6829	13.7173	3.77792	0.73803	5.11893	3.07e-07	3.72e-06
WBGene00018296	F41F3.1	F41F3.1	2.2697	13.704	3.77653	1.49833	2.5205	0.0117189	0.0370465
WBGene00011191	R10D12.10	R10D12.10	3.31824	13.6328	3.76901	1.26159	2.9875	0.00281273	0.0113663
WBGene00006052	ssq-3	ZC477.1	40.5151	13.523	3.75735	0.391132	9.60633	7.52e-22	5.82e-20
WBGene00009269	F30A10.12	F30A10.12	5.21163	13.5118	3.75615	1.03897	3.61525	0.000300059	0.00170976
WBGene00009410	F35E2.2	F35E2.2	2.93688	13.3548	3.73929	1.49746	2.49709	0.0125216	0.0391194
WBGene00044417	C08F1.11	C08F1.11	2.6494	13.3071	3.73413	1.55252	2.40521	0.0161632	0.0482131
WBGene00014007	ZK596.2	ZK596.2	7.56342	13.0936	3.71078	0.873812	4.24666	2.17e-05	0.0001722
WBGene00044006	nlp-82	H32K21.1	3.10652	12.977	3.69788	1.29227	2.86154	0.00421591	0.0160011
WBGene00019950	clec-175	R08C7.6	3.47469	12.8712	3.68608	1.33242	2.76646	0.00566686	0.0203765
WBGene00019084	F59A6.2	F59A6.2	2.41346	12.7208	3.66911	1.4856	2.46979	0.0135193	0.0416532
WBGene00009550	F38H4.6	F38H4.6	2.10137	12.6507	3.66115	1.52205	2.40541	0.0161544	0.0481965
WBGene00010611	K07A1.4	K07A1.4	8.15204	12.6015	3.65553	0.797195	4.58549	4.53e-06	4.31e-05
WBGene00045411	C25F9.11	C25F9.11	4.94286	12.438	3.63668	1.0877	3.34347	0.000827384	0.00407113
WBGene00022778	ZK616.8	ZK616.8	3.4639	12.3878	3.63084	1.27437	2.84914	0.00438382	0.0165021
WBGene00019248	H27M09.5	H27M09.5	4.95493	12.3424	3.62556	1.08659	3.33663	0.000848008	0.0041522
WBGene00017636	F20D6.6	F20D6.6	12.3464	12.1728	3.60559	0.6715	5.36946	7.9e-08	1.07e-06
WBGene00020713	T23B3.5	T23B3.5	28.954	12.1267	3.60012	0.439733	8.18705	2.68e-16	1.24e-14
WBGene00003426	msp-19	F36H12.7	30.973	12.1055	3.5976	0.445378	8.07763	6.6e-16	2.87e-14
WBGene00003456	msp-63	K05F1.7	3.03404	11.9665	3.58092	1.28197	2.79331	0.00521721	0.0190616
WBGene00007381	C06C6.7	C06C6.7	3.13495	11.9288	3.57637	1.30749	2.7353	0.00623233	0.0219826
WBGene00006044	ssp-16	T27A3.3	18.9519	11.8313	3.56453	0.543833	6.55446	5.58e-11	1.27e-09
WBGene00018803	fbxa-24	F54D10.2	11.1792	11.5453	3.52923	0.688468	5.1262	2.96e-07	3.59e-06
WBGene00020350	T08B2.12	T08B2.12	3.93716	11.5155	3.52551	1.24929	2.822	0.0047725	0.0177234
WBGene00012070	T26H5.8	T26H5.8	3.60262	11.4758	3.52052	1.24241	2.83362	0.00460238	0.0172054
WBGene00018497	msrp-3	F46F5.6	3.06094	11.3442	3.50389	1.28479	2.7272	0.00638735	0.0224304
WBGene00014247	ZK1307.4	ZK1307.4	19.0279	11.3063	3.49905	0.521089	6.71487	1.88e-11	4.71e-10
WBGene00017808	nspd-9	F26A1.10	7.56397	11.0451	3.46534	0.810806	4.27395	1.92e-05	0.000154756
WBGene00003458	msp-65	ZK354.1	9.80884	10.9492	3.45276	0.749995	4.60371	4.15e-06	3.99e-05
WBGene00010869	M05B5.1	M05B5.1	7.8179	10.9439	3.45205	0.864896	3.99129	6.57e-05	0.000449298
WBGene00007794	C28D4.7	C28D4.7	11.2588	10.9086	3.44739	0.674037	5.11455	3.14e-07	3.81e-06
WBGene00007080	sfxn-1.1	AH6.2	6.09741	10.8962	3.44575	0.910057	3.7863	0.000152905	0.000944314
WBGene00007366	C06B3.7	C06B3.7	19.4578	10.8779	3.44333	0.538492	6.39438	1.61e-10	3.43e-09
WBGene00017955	F31E8.5	F31E8.5	14.352	10.816	3.4351	0.611896	5.61386	1.98e-08	3.02e-07
WBGene00007209	BE10.1	BE10.1	6.35124	10.7352	3.42428	0.896136	3.82117	0.000132822	0.000836284
WBGene00010992	R03D7.8	R03D7.8	3.93979	10.6389	3.41128	1.26352	2.69982	0.00693773	0.0239802
WBGene00019406	acdh-8	K05F1.3	38.7493	10.6225	3.40905	0.367996	9.26384	1.97e-20	1.34e-18
WBGene00009695	clp-8	F44F1.3	7.45285	10.6082	3.4071	0.826275	4.12345	3.73e-05	0.000276275
WBGene00001391	far-7	K01A2.2	10.9747	10.569	3.40176	1.028	3.3091	0.000935957	0.00451294
WBGene00009753	scrm-6	F46A8.10	4.663	10.5306	3.39652	1.04604	3.24703	0.00116614	0.00541962
WBGene00007306	C04G2.5	C04G2.5	5.11948	10.5213	3.39525	1.0275	3.30436	0.000951925	0.00457779
WBGene00019642	K11C4.1	K11C4.1	7.00139	10.5003	3.39236	0.838712	4.04473	5.24e-05	0.000367656
WBGene00020661	smz-2	T21G5.4	40.6481	10.4782	3.38932	0.350464	9.67095	4.01e-22	3.22e-20
WBGene00011132	R08A2.1	R08A2.1	4.79629	10.458	3.38653	1.03543	3.27065	0.001073	0.00506904
WBGene00015422	C04E6.5	C04E6.5	2.71633	10.3912	3.37729	1.29462	2.6087	0.0090886	0.0300983
WBGene00044062	snb-6	T14D7.3	5.23613	10.3902	3.37715	0.951626	3.54882	0.000386963	0.00212668
WBGene00003424	msp-3	F26G1.7	30.1878	10.3768	3.37529	0.412184	8.18879	2.64e-16	1.23e-14
WBGene00021587	clec-76	Y46C8AR.1	7.51133	10.247	3.35714	0.789978	4.24966	2.14e-05	0.000170181
WBGene00006047	ssp-19	C55C2.2	13.4303	10.1484	3.34319	0.590205	5.66445	1.47e-08	2.32e-07
WBGene00044447	ZK688.10	ZK688.10	7.1715	10.0637	3.33109	0.818437	4.07007	4.7e-05	0.000335612
WBGene00013886	ZC412.5	ZC412.5	2.51336	10.0588	3.33039	1.37224	2.42697	0.0152254	0.0458654
WBGene00044772	T23E7.6	T23E7.6	4.87548	10.0256	3.32562	0.959845	3.46475	0.00053073	0.00279531
WBGene00009754	F46A9.1	F46A9.1	6.00783	10.0174	3.32443	0.907886	3.66172	0.000250523	0.00145816
WBGene00009773	lipl-2	F46B6.8	106.682	9.99009	3.3205	0.221813	14.9698	1.16e-50	7.31e-48
WBGene00012855	Y44A6D.5	Y44A6D.5	8.1461	9.96894	3.31744	0.818758	4.05179	5.08e-05	0.000358216
WBGene00004127	abu-12	F52D1.3	3.51813	9.95418	3.3153	1.25393	2.64393	0.008195	0.0276213
WBGene00007190	rmd-3	B0491.3	42.4393	9.94917	3.31458	0.335263	9.88649	4.76e-23	4.08e-21
WBGene00009321	F32B6.4	F32B6.4	10.7736	9.94504	3.31398	0.656593	5.04723	4.48e-07	5.24e-06
WBGene00006051	ssq-2	T28H11.5	206.814	9.94321	3.31371	0.236439	14.0151	1.26e-44	5.31e-42
WBGene00017902	F28E10.4	F28E10.4	3.97895	9.90099	3.30757	1.10395	2.99612	0.00273435	0.0111302
WBGene00015629	C09B9.4	C09B9.4	9.34026	9.85848	3.30137	0.740646	4.45741	8.3e-06	7.43e-05
WBGene00016040	C24A11.1	C24A11.1	9.02539	9.77351	3.28888	0.702495	4.68171	2.84e-06	2.85e-05
WBGene00011491	T05F1.5	T05F1.5	13.8952	9.73112	3.28261	0.623878	5.26161	1.43e-07	1.86e-06
WBGene00010114	F55D12.6	F55D12.6	7.72194	9.65977	3.27199	0.832993	3.92799	8.57e-05	0.000570083
WBGene00219709	linc-37	K02F3.14	2.6208	9.6459	3.26992	1.36063	2.40323	0.016251	0.0483736
WBGene00011462	vap-2	T05A10.5	5.92672	9.62017	3.26606	0.958661	3.4069	0.000657055	0.00336148
WBGene00011466	T05C12.1	T05C12.1	10.0865	9.59507	3.26229	0.705186	4.62615	3.73e-06	3.64e-05
WBGene00003449	msp-56	K07F5.3	13.1473	9.59142	3.26175	0.62219	5.24236	1.59e-07	2.04e-06
WBGene00019561	K09C6.7	K09C6.7	13.4248	9.57173	3.25878	0.621441	5.2439	1.57e-07	2.02e-06
WBGene00015855	C16C8.18	C16C8.18	6.62058	9.56807	3.25823	0.87122	3.73985	0.000184134	0.00111007
WBGene00010474	K01D12.15	K01D12.15	3.36691	9.50715	3.24901	1.14584	2.83548	0.00457574	0.0171226
WBGene00018134	F37A4.4	F37A4.4	17.7078	9.42003	3.23573	0.518721	6.23791	4.43e-10	8.9e-09
WBGene00235293	F56D6.19	F56D6.19	2.70129	9.40278	3.23309	1.34495	2.40388	0.0162223	0.0483135
WBGene00009502	F37A8.2	F37A8.2	2.93512	9.37155	3.22829	1.3018	2.47986	0.0131432	0.0407715
WBGene00020715	nspd-4	T23B7.1	17.1491	9.35627	3.22593	0.539546	5.97898	2.25e-09	4.08e-08
WBGene00014127	ZK892.3	ZK892.3	3.85028	9.35056	3.22505	1.10694	2.91349	0.00357415	0.013892
WBGene00044475	F56D6.13	F56D6.13	4.25308	9.33851	3.22319	1.06142	3.03667	0.00239204	0.0099498
WBGene00011378	T02E1.6	T02E1.6	9.33216	9.33621	3.22284	0.749261	4.30135	1.7e-05	0.000138863
WBGene00011120	R07E5.15	R07E5.15	16.7866	9.31277	3.21921	0.52573	6.12332	9.16e-10	1.75e-08
WBGene00019531	scrm-5	K08D10.8	7.99498	9.31089	3.21892	0.773211	4.16305	3.14e-05	0.00023978
WBGene00013138	Y53C10A.10	Y53C10A.10	10.5436	9.28275	3.21455	0.678669	4.73655	2.17e-06	2.23e-05
WBGene00006416	sams-5	T13A10.11	62.4923	9.24553	3.20876	0.273941	11.7133	1.09e-31	1.7e-29
WBGene00077685	C04F12.12	C04F12.12	2.87494	9.24314	3.20838	1.31968	2.43119	0.0150493	0.0454535
WBGene00012926	Y47D3A.13	Y47D3A.13	10.9554	9.22383	3.20537	0.65736	4.87611	1.08e-06	1.18e-05
WBGene00021993	Y59E9AL.3	Y59E9AL.3	7.19128	9.20788	3.20287	0.789001	4.0594	4.92e-05	0.000348367
WBGene00007335	C05C12.1	C05C12.1	5.76147	9.19626	3.20105	0.880814	3.63419	0.000278852	0.0016052
WBGene00020990	W03D8.9	W03D8.9	49.422	9.07587	3.18204	0.306793	10.3719	3.33e-25	3.34e-23
WBGene00008660	clec-153	F10F2.8	6.35924	9.07554	3.18198	0.833114	3.81939	0.000133784	0.000841642
WBGene00019255	H32C10.1	H32C10.1	8.88977	9.04845	3.17767	0.716843	4.43287	9.3e-06	8.17e-05
WBGene00021996	Y59E9AL.6	Y59E9AL.6	34.6591	8.95044	3.16196	0.367877	8.59514	8.32e-18	4.43e-16
WBGene00021110	W09C3.2	W09C3.2	4.45678	8.94846	3.16164	1.07476	2.94171	0.003264	0.0128644
WBGene00003463	msp-76	ZK1251.6	60.2492	8.91696	3.15655	0.289311	10.9106	1.03e-27	1.27e-25
WBGene00007159	B0379.7	B0379.7	24.9608	8.91585	3.15637	0.43006	7.33937	2.15e-13	6.84e-12
WBGene00018121	F36H12.5	F36H12.5	5.37778	8.90419	3.15448	0.926344	3.40531	0.000660897	0.00337637
WBGene00044388	C27D6.11	C27D6.11	9.01647	8.90086	3.15395	0.733378	4.30057	1.7e-05	0.000139279
WBGene00008508	F01G10.5	F01G10.5	4.01473	8.88864	3.15196	1.08625	2.9017	0.00371144	0.0143593
WBGene00021703	cpt-3	Y48G9A.10	3.45855	8.8805	3.15064	1.12296	2.80567	0.00502124	0.0184843
WBGene00014129	ZK892.5	ZK892.5	9.32702	8.85169	3.14595	0.678528	4.63644	3.54e-06	3.47e-05
WBGene00010324	F59C6.3	F59C6.3	3.33947	8.85085	3.14582	1.27016	2.4767	0.0132603	0.0410804
WBGene00016052	dod-3	C24B9.9	47.6808	8.78283	3.13469	0.340333	9.21065	3.24e-20	2.14e-18
WBGene00044512	W03F9.11	W03F9.11	4.62962	8.78175	3.13451	0.986686	3.1768	0.00148909	0.00667909
WBGene00013887	nspa-5	ZC412.6	5.72222	8.77629	3.13361	0.889669	3.52222	0.000427947	0.00232248
WBGene00010300	F59A1.15	F59A1.15	3.7456	8.75695	3.13043	1.09459	2.8599	0.00423768	0.0160556
WBGene00018694	F52E1.5	F52E1.5	4.30296	8.72308	3.12484	0.963431	3.24345	0.00118093	0.00547827
WBGene00010254	F58E6.5	F58E6.5	20.7773	8.69649	3.12043	0.465431	6.70439	2.02e-11	5.01e-10
WBGene00015992	C18H2.5	C18H2.5	5.27729	8.69375	3.11998	0.944816	3.30221	0.000959266	0.00460922
WBGene00003431	msp-33	R05F9.8	48.144	8.60901	3.10585	0.320383	9.69417	3.19e-22	2.62e-20
WBGene00016680	C45G9.9	C45G9.9	5.65425	8.5494	3.09582	0.879896	3.5184	0.000434163	0.0023495
WBGene00007308	C04G2.9	C04G2.9	194.693	8.48494	3.08491	0.242408	12.7261	4.24e-37	9.45e-35
WBGene00020289	T06C10.3	T06C10.3	4.94727	8.45672	3.0801	0.961522	3.20336	0.00135835	0.00617853
WBGene00007714	C25D7.1	C25D7.1	3.30225	8.44838	3.07868	1.16285	2.64753	0.00810828	0.0273776
WBGene00021491	comt-4	Y40B10A.6	5.7596	8.44043	3.07732	0.847111	3.63272	0.000280447	0.00161194
WBGene00022133	Y71F9B.15	Y71F9B.15	3.58084	8.41726	3.07335	1.12938	2.72128	0.00650306	0.0227577
WBGene00020840	spch-3	T27A3.4	32.6557	8.41566	3.07308	0.401267	7.65844	1.88e-14	6.93e-13
WBGene00012809	Y43F8A.2	Y43F8A.2	19.6853	8.34213	3.06042	0.483517	6.32949	2.46e-10	5.1e-09
WBGene00008124	C47A4.3	C47A4.3	4.44448	8.33834	3.05976	0.953844	3.20782	0.00133745	0.00609992
WBGene00015994	C18H7.4	C18H7.4	5.48896	8.33153	3.05858	0.940448	3.25226	0.00114491	0.00534715
WBGene00017378	F11C7.6	F11C7.6	2.85746	8.32452	3.05737	1.17158	2.60961	0.00906454	0.0300317
WBGene00002208	kin-26	T06C10.6	3.56241	8.30804	3.05451	1.11602	2.73697	0.00620089	0.0218819
WBGene00020414	T10E9.4	T10E9.4	76.2036	8.30376	3.05376	0.255101	11.9708	5.05e-33	8.62e-31
WBGene00043147	nspd-6	C24D10.8	5.33476	8.29574	3.05237	0.889107	3.43307	0.000596778	0.00309379
WBGene00009708	F44G3.7	F44G3.7	9.20755	8.24661	3.0438	0.70415	4.32266	1.54e-05	0.000127546
WBGene00015084	B0244.9	B0244.9	4.41391	8.21192	3.03772	0.99797	3.0439	0.00233533	0.00976319
WBGene00019461	K07A3.3	K07A3.3	7.75668	8.21177	3.03769	0.773846	3.92545	8.66e-05	0.000575126
WBGene00015051	B0218.7	B0218.7	17.0559	8.20613	3.0367	0.503603	6.02995	1.64e-09	3.02e-08
WBGene00022708	ZK354.7	ZK354.7	7.90937	8.20261	3.03608	0.730118	4.15835	3.21e-05	0.000243793
WBGene00020860	nspd-10	T27C10.7	33.4684	8.17392	3.03103	0.371362	8.16192	3.3e-16	1.5e-14
WBGene00016954	C55C3.4	C55C3.4	5.20111	8.16416	3.0293	0.951087	3.1851	0.00144706	0.00651949
WBGene00008659	clec-151	F10F2.7	8.60888	8.14298	3.02556	0.708838	4.26833	1.97e-05	0.000158033
WBGene00010136	F55H12.5	F55H12.5	12.8695	8.12099	3.02166	0.590007	5.12139	3.03e-07	3.68e-06
WBGene00019109	F59E11.2	F59E11.2	5.19797	8.09735	3.01745	0.88793	3.3983	0.000678065	0.00344112
WBGene00008152	C47E12.9	C47E12.9	4.44083	8.09314	3.0167	0.954363	3.16096	0.00157252	0.00699337
WBGene00011336	ubxn-5	T01E8.9	15.7615	8.09251	3.01659	0.53485	5.64006	1.7e-08	2.63e-07
WBGene00013474	Y69E1A.2	Y69E1A.2	108.128	8.07366	3.01322	0.214349	14.0576	6.92e-45	3e-42
WBGene00019920	acs-15	R07C3.4	9.71365	8.05021	3.00903	0.687957	4.37386	1.22e-05	0.000103479
WBGene00007478	C09F9.1	C09F9.1	4.09242	8.02256	3.00406	1.07893	2.7843	0.00536427	0.0195058
WBGene00016845	C50F7.5	C50F7.5	27.7152	7.98715	2.99768	0.411651	7.28209	3.29e-13	1.02e-11
WBGene00050956	C14A6.13	C14A6.13	7.80498	7.96207	2.99314	0.734252	4.07645	4.57e-05	0.000328697
WBGene00012177	decr-1.2	W01C9.4	8.40799	7.95686	2.9922	0.724019	4.13277	3.58e-05	0.000266604
WBGene00003457	msp-64	ZK1248.6	54.9187	7.95049	2.99104	0.297171	10.065	7.88e-24	7.08e-22
WBGene00009501	F37A8.1	F37A8.1	3.29478	7.92495	2.9864	1.11095	2.68815	0.00718498	0.0246998
WBGene00015045	cyp-34A10	B0213.16	64.1488	7.91542	2.98467	0.387319	7.70596	1.3e-14	4.91e-13
WBGene00011425	T04B2.7	T04B2.7	5.59422	7.91186	2.98402	0.861979	3.46182	0.000536531	0.00282489
WBGene00019501	K07E12.2	K07E12.2	3.03218	7.88573	2.97924	1.21329	2.45551	0.0140684	0.0430304
WBGene00010633	nspd-2	K07F5.5	89.3946	7.88353	2.97884	0.230802	12.9065	4.14e-38	1.05e-35
WBGene00019421	K05F6.10	K05F6.10	8.27837	7.85177	2.97302	0.73409	4.04994	5.12e-05	0.000360568
WBGene00006053	ssq-4	T28H11.1	130.124	7.83738	2.97037	0.368328	8.06448	7.36e-16	3.18e-14
WBGene00021113	gsp-3	W09C3.6	37.8802	7.81855	2.9669	0.33306	8.90801	5.2e-19	3.03e-17
WBGene00003442	msp-49	C34F11.6	54.9572	7.78761	2.96118	0.298946	9.90541	3.94e-23	3.44e-21
WBGene00013473	Y69E1A.1	Y69E1A.1	61.0445	7.7869	2.96105	0.271384	10.9109	1.02e-27	1.27e-25
WBGene00003450	msp-57	R13H9.2	36.4215	7.72729	2.94996	0.356368	8.27786	1.25e-16	6.08e-15
WBGene00017922	F29B9.7	F29B9.7	5.3705	7.69486	2.9439	0.882883	3.33441	0.000854805	0.00418009
WBGene00021619	Y47D7A.6	Y47D7A.6	12.2793	7.69024	2.94303	0.55402	5.31213	1.08e-07	1.45e-06
WBGene00007457	C08F11.10	C08F11.10	12.4461	7.68544	2.94213	0.597929	4.92053	8.63e-07	9.62e-06
WBGene00010563	K04G2.4	K04G2.4	17.0015	7.68503	2.94205	0.5005	5.87822	4.15e-09	7.25e-08
WBGene00003452	msp-59	ZK354.11	25.7266	7.67309	2.93981	0.426464	6.89345	5.45e-12	1.47e-10
WBGene00016447	msd-4	C35D10.11	110.382	7.66266	2.93785	0.326264	9.00451	2.17e-19	1.33e-17
WBGene00007305	ttbk-5	C04G2.2	10.1979	7.65752	2.93688	0.636112	4.61692	3.89e-06	3.79e-05
WBGene00020905	T28H11.7	T28H11.7	15.4821	7.65508	2.93642	0.549891	5.33999	9.29e-08	1.25e-06
WBGene00009714	F44G4.5	F44G4.5	4.29887	7.65435	2.93628	0.979203	2.99864	0.00271184	0.0110557
WBGene00020265	fbxa-196	T05H4.2	4.10659	7.61009	2.92791	1.0741	2.72593	0.00641206	0.0225015
WBGene00010900	M28.9	M28.9	26.2468	7.60887	2.92768	0.398822	7.34082	2.12e-13	6.8e-12
WBGene00003448	msp-55	C09B9.6	24.564	7.60183	2.92635	0.444469	6.58391	4.58e-11	1.06e-09
WBGene00006048	ssp-31	ZK1225.6	10.8384	7.59706	2.92544	0.64264	4.55223	5.31e-06	4.97e-05
WBGene00189950	C39B5.14	C39B5.14	8.77538	7.56366	2.91908	0.712262	4.09833	4.16e-05	0.000303147
WBGene00003470	msp-152	ZK546.6	47.7245	7.53753	2.91409	0.494286	5.89556	3.73e-09	6.57e-08
WBGene00019086	F59A6.4	F59A6.4	8.65753	7.52989	2.91263	0.71745	4.0597	4.91e-05	0.00034808
WBGene00014813	M176.9	M176.9	7.09727	7.51092	2.90899	0.786052	3.70076	0.000214955	0.00127665
WBGene00009755	F46A9.2	F46A9.2	3.28053	7.46941	2.901	1.12174	2.58615	0.00970559	0.0318565
WBGene00013318	Y57G11C.23	Y57G11C.23	5.57373	7.46928	2.90097	0.909809	3.18855	0.0014299	0.00645752
WBGene00020223	T05A7.6	T05A7.6	26.2615	7.44571	2.89641	0.423034	6.84675	7.55e-12	2e-10
WBGene00219326	F36D3.16	F36D3.16	6.98735	7.43536	2.8944	0.790718	3.66047	0.000251751	0.00146321
WBGene00015907	C17F3.1	C17F3.1	29.8577	7.41774	2.89098	0.380805	7.59175	3.16e-14	1.13e-12
WBGene00009682	msd-2	F44D12.5	36.37	7.41647	2.89073	0.34243	8.44181	3.12e-17	1.6e-15
WBGene00015348	C02F5.5	C02F5.5	21.9328	7.41367	2.89019	0.42959	6.72778	1.72e-11	4.35e-10
WBGene00016783	irg-2	C49G7.5	8.90083	7.39469	2.88649	0.682453	4.22958	2.34e-05	0.000183695
WBGene00018745	F53C3.1	F53C3.1	3.34094	7.39323	2.8862	1.12558	2.56418	0.0103419	0.0334244
WBGene00020356	T08B6.9	T08B6.9	7.08066	7.36185	2.88007	0.762095	3.77915	0.000157367	0.000968327
WBGene00017542	F17E9.5	F17E9.5	64.9821	7.34562	2.87688	0.270784	10.6243	2.3e-26	2.55e-24
WBGene00001464	flp-21	C26F1.10	2.79958	7.33088	2.87399	1.16939	2.45768	0.0139837	0.0428144
WBGene00019024	F58A6.5	F58A6.5	7.08849	7.32855	2.87353	0.740712	3.87941	0.000104708	0.000679573
WBGene00003467	msp-81	K07F5.1	43.5157	7.32676	2.87317	0.323495	8.88167	6.59e-19	3.8e-17
WBGene00012357	W09D6.4	W09D6.4	9.93477	7.28321	2.86457	0.655764	4.3683	1.25e-05	0.000105851
WBGene00003425	msp-10	K07F5.2	12.7137	7.26075	2.86012	0.581919	4.91497	8.88e-07	9.88e-06
WBGene00017386	nspd-5	F11G11.8	30.6337	7.25507	2.85899	0.381849	7.48722	7.03e-14	2.39e-12
WBGene00015931	C17H12.5	C17H12.5	12.4538	7.23545	2.85508	0.594933	4.799	1.59e-06	1.67e-05
WBGene00016054	C24D10.2	C24D10.2	12.3729	7.21014	2.85003	0.586126	4.86248	1.16e-06	1.26e-05
WBGene00011467	decr-1.3	T05C12.3	4.0626	7.156	2.83915	1.04251	2.72337	0.00646196	0.0226347
WBGene00012925	wht-8	Y47D3A.11	7.58942	7.15592	2.83914	0.724297	3.91985	8.86e-05	0.000587365
WBGene00012207	W02B12.12	W02B12.12	34.7139	7.1385	2.83562	0.361295	7.8485	4.21e-15	1.68e-13
WBGene00018314	F41H10.1	F41H10.1	31.3604	7.1348	2.83487	0.366763	7.72945	1.08e-14	4.14e-13
WBGene00013956	ZK265.3	ZK265.3	45.715	7.12148	2.83218	0.306194	9.24961	2.25e-20	1.52e-18
WBGene00008299	C54D10.4	C54D10.4	3.74984	7.11904	2.83168	0.989187	2.86264	0.00420132	0.0159577
WBGene00003469	msp-142	K05F1.2	25.302	7.11639	2.83115	0.413365	6.84903	7.44e-12	1.97e-10
WBGene00013858	ssp-34	ZC168.6	23.8322	7.04821	2.81726	0.413835	6.80768	9.92e-12	2.57e-10
WBGene00010510	ent-3	K02E11.1	12.5312	7.03507	2.81456	0.568111	4.95425	7.26e-07	8.21e-06
WBGene00012087	T27E7.1	T27E7.1	42.4762	7.03408	2.81436	0.32592	8.63512	5.87e-18	3.18e-16
WBGene00010046	F54D1.1	F54D1.1	8.19403	7.03307	2.81415	0.673867	4.17613	2.97e-05	0.000227698
WBGene00015097	B0273.1	B0273.1	15.3717	7.02487	2.81247	0.508553	5.53034	3.2e-08	4.71e-07
WBGene00019530	scrm-8	K08D10.7	3.83845	6.98995	2.80528	1.09544	2.56086	0.0104412	0.0336809
WBGene00013854	cyc-2.2	ZC116.2	36.1258	6.9848	2.80422	0.371641	7.54551	4.51e-14	1.58e-12
WBGene00008754	F13E9.5	F13E9.5	5.18294	6.98298	2.80384	0.933438	3.00378	0.00266649	0.0108943
WBGene00003432	msp-36	C04G2.4	52.879	6.98222	2.80369	0.296995	9.44017	3.72e-21	2.72e-19
WBGene00008724	F13A7.1	F13A7.1	24.2127	6.96999	2.80116	0.417043	6.71672	1.86e-11	4.65e-10
WBGene00011401	T03F6.6	T03F6.6	14.3994	6.96663	2.80046	0.527298	5.31096	1.09e-07	1.46e-06
WBGene00018548	clec-79	F47C12.4	17.098	6.96427	2.79997	0.488458	5.73227	9.91e-09	1.61e-07
WBGene00004904	snf-5	Y46G5A.30	61.0255	6.9591	2.7989	0.266282	10.511	7.68e-26	8.15e-24
WBGene00006553	tbx-34	Y47D3A.10	4.8744	6.95675	2.79841	0.90441	3.09419	0.00197354	0.00848822
WBGene00011214	R10E9.2	R10E9.2	74.5907	6.9172	2.79019	0.247815	11.2592	2.09e-29	2.85e-27
WBGene00023424	C53D6.10	C53D6.10	8.51884	6.91426	2.78957	0.71591	3.89654	9.76e-05	0.00063957
WBGene00011173	acs-18	R09E10.3	17.5748	6.90077	2.78676	0.471323	5.91263	3.37e-09	5.98e-08
WBGene00009492	F36H1.3	F36H1.3	7.50412	6.89453	2.78545	0.739205	3.76817	0.000164447	0.00100577
WBGene00008074	nkb-2	C43F9.6	14.3758	6.89171	2.78486	0.55592	5.00946	5.46e-07	6.28e-06
WBGene00007777	C27D8.1	C27D8.1	18.602	6.88281	2.783	0.496949	5.60017	2.14e-08	3.25e-07
WBGene00003429	msp-31	R05F9.13	48.1045	6.8814	2.7827	0.299533	9.29013	1.54e-20	1.06e-18
WBGene00006449	alg-4	ZK757.3	26.6296	6.87964	2.78233	0.392991	7.07989	1.44e-12	4.17e-11
WBGene00022751	msrp-2	ZK484.5	100.508	6.86542	2.77935	0.379891	7.31616	2.55e-13	8.07e-12
WBGene00020326	math-38	T07H3.3	37.8627	6.84914	2.77592	0.347066	7.99826	1.26e-15	5.3e-14
WBGene00015089	B0252.5	B0252.5	12.7988	6.84249	2.77452	0.574103	4.8328	1.35e-06	1.44e-05
WBGene00019626	K10C9.7	K10C9.7	4.80928	6.83786	2.77355	0.909443	3.04972	0.00229057	0.00961469
WBGene00009185	F27C8.5	F27C8.5	11.1989	6.82315	2.77044	0.603225	4.59271	4.38e-06	4.18e-05
WBGene00016753	oac-9	C48E7.8	8.19729	6.81817	2.76939	0.73919	3.74651	0.00017931	0.001084
WBGene00016161	C27D6.3	C27D6.3	18.5351	6.81767	2.76928	0.490125	5.65015	1.6e-08	2.5e-07
WBGene00016399	C34D4.3	C34D4.3	25.0849	6.80596	2.7668	0.393756	7.02669	2.11e-12	6.02e-11
WBGene00010373	H08M01.1	H08M01.1	4.24928	6.79977	2.76549	1.01325	2.72932	0.00634649	0.0223179
WBGene00013771	Y113G7C.1	Y113G7C.1	31.9357	6.78416	2.76217	0.358819	7.69794	1.38e-14	5.21e-13
WBGene00008590	F08H9.2	F08H9.2	34.9236	6.77081	2.75933	0.357348	7.72168	1.15e-14	4.39e-13
WBGene00012827	Y43F8C.5	Y43F8C.5	11.1933	6.76946	2.75904	0.611883	4.5091	6.51e-06	5.97e-05
WBGene00011297	R102.10	R102.10	6.01034	6.76846	2.75883	0.807486	3.41657	0.000634161	0.00326195
WBGene00018792	F54C1.8	F54C1.8	3.87745	6.7572	2.75642	1.00387	2.74579	0.0060365	0.0214314
WBGene00022888	rnh-1.1	ZK1290.6	8.42643	6.75511	2.75598	0.675113	4.08225	4.46e-05	0.000322496
WBGene00021908	Y55B1AR.4	Y55B1AR.4	5.98353	6.74843	2.75455	0.821056	3.35489	0.000793963	0.00393712
WBGene00001730	grl-21	ZC168.5	4.68199	6.73848	2.75242	0.92775	2.96677	0.00300944	0.0120267
WBGene00013700	Y106G6D.3	Y106G6D.3	32.2955	6.73205	2.75105	0.358843	7.66643	1.77e-14	6.53e-13
WBGene00020140	ant-1.4	T01B11.4	8.15089	6.73003	2.75061	0.744011	3.697	0.000218158	0.00129259
WBGene00009938	F52F12.5	F52F12.5	13.4729	6.70976	2.74626	0.556717	4.93296	8.1e-07	9.06e-06
WBGene00003434	msp-38	K08F4.8	28.5365	6.70679	2.74562	0.382567	7.17684	7.13e-13	2.12e-11
WBGene00006050	ssq-1	K07F5.11	159.752	6.70003	2.74417	0.300285	9.13853	6.33e-20	4.09e-18
WBGene00010883	M7.7	M7.7	5.52814	6.69904	2.74396	0.868656	3.15885	0.00158392	0.00703583
WBGene00015865	C16E9.1	C16E9.1	15.754	6.69141	2.74231	0.493043	5.562	2.67e-08	3.97e-07
WBGene00003443	msp-50	C34F11.4	63.469	6.6865	2.74125	0.258051	10.6229	2.33e-26	2.56e-24
WBGene00021167	cyp-32B1	Y5H2B.5	35.9432	6.68156	2.74018	0.340283	8.05265	8.1e-16	3.47e-14
WBGene00017194	F07C3.3	F07C3.3	3.48505	6.67134	2.73798	1.10619	2.47514	0.0133185	0.0412018
WBGene00016807	C50D2.3	C50D2.3	2.95093	6.65874	2.73525	1.12967	2.42128	0.0154661	0.0464441
WBGene00016541	C39H7.1	C39H7.1	61.1201	6.64312	2.73186	0.2737	9.98124	1.84e-23	1.63e-21
WBGene00018163	F38A5.6	F38A5.6	3.40783	6.64042	2.73128	1.11788	2.44326	0.0145551	0.0442073
WBGene00001424	fis-1	F41G3.4	3.83808	6.62778	2.72852	1.01623	2.68494	0.00725436	0.0248763
WBGene00255375	F08B4.8	F08B4.8	55.9124	6.62172	2.7272	0.283069	9.63441	5.72e-22	4.45e-20
WBGene00017559	mpz-3	F18C5.4	6.96451	6.62097	2.72704	0.773932	3.52362	0.000425694	0.00231108
WBGene00009759	ttr-12	F46B3.4	3.97243	6.61737	2.72626	0.995316	2.73909	0.00616099	0.0217563
WBGene00013656	Y105C5B.17	Y105C5B.17	3.37274	6.61694	2.72616	1.1242	2.42499	0.015309	0.0460543
WBGene00018336	F42A9.7	F42A9.7	9.59617	6.61015	2.72468	0.650486	4.18869	2.81e-05	0.000216663
WBGene00015696	C10H11.7	C10H11.7	5.89225	6.60879	2.72439	0.834318	3.2654	0.00109309	0.00514789
WBGene00009463	F36D1.4	F36D1.4	4.58654	6.55148	2.71182	0.993774	2.72881	0.0063563	0.0223418
WBGene00018120	F36H12.4	F36H12.4	3.44596	6.53882	2.70903	1.11175	2.43673	0.0148209	0.044862
WBGene00015688	C10G11.8	C10G11.8	95.1166	6.53432	2.70804	0.212976	12.7152	4.87e-37	1.06e-34
WBGene00007987	C36H8.1	C36H8.1	15.0247	6.52918	2.7069	0.531334	5.09454	3.5e-07	4.18e-06
WBGene00020531	T15B12.2	T15B12.2	4.70167	6.52237	2.7054	0.987428	2.73984	0.00614691	0.0217218
WBGene00077519	T27C10.8	T27C10.8	7.1673	6.50345	2.70121	0.734538	3.67742	0.000235603	0.00138299
WBGene00010516	K02E11.7	K02E11.7	21.326	6.49374	2.69905	0.408919	6.60045	4.1e-11	9.5e-10
WBGene00017660	F21C10.11	F21C10.11	13.0969	6.484	2.69688	0.539647	4.9975	5.81e-07	6.67e-06
WBGene00007301	C04F12.7	C04F12.7	71.3899	6.48036	2.69607	0.252212	10.6897	1.14e-26	1.29e-24
WBGene00009160	F26E4.5	F26E4.5	8.95775	6.46464	2.69257	0.667051	4.03653	5.42e-05	0.000379515
WBGene00044177	C30G7.3	C30G7.3	14.8092	6.45801	2.69109	0.519621	5.17894	2.23e-07	2.78e-06
WBGene00009031	F21H7.5	F21H7.5	70.4925	6.45074	2.68946	0.239195	11.2438	2.48e-29	3.37e-27
WBGene00003778	nnt-1	C15H9.1	31.1701	6.42915	2.68463	0.371316	7.23003	4.83e-13	1.48e-11
WBGene00012595	Y38E10A.17	Y38E10A.17	59.0669	6.42003	2.68258	0.261155	10.272	9.43e-25	9.23e-23
WBGene00003464	msp-77	F32B6.6	27.4042	6.4198	2.68253	0.384646	6.97402	3.08e-12	8.61e-11
WBGene00011114	R07E5.6	R07E5.6	7.64111	6.39908	2.67787	0.717114	3.73422	0.000188295	0.00113336
WBGene00007883	C33A12.4	C33A12.4	6.65069	6.39351	2.67661	0.781124	3.42661	0.000611165	0.00315866
WBGene00009908	F49H6.5	F49H6.5	5.52198	6.38152	2.6739	0.841002	3.17942	0.00147568	0.00663074
WBGene00022754	nspd-1	ZK484.8	73.8126	6.37091	2.6715	0.249814	10.6939	1.09e-26	1.24e-24
WBGene00010650	K08C9.1	K08C9.1	8.75586	6.35252	2.66733	0.66895	3.98734	6.68e-05	0.000456105
WBGene00001603	gln-2	K03H1.1	31.0438	6.35214	2.66724	0.35842	7.44166	9.94e-14	3.3e-12
WBGene00020053	R13A5.11	R13A5.11	4.95284	6.35042	2.66685	0.896815	2.97369	0.0029424	0.011796
WBGene00016053	C24D10.1	C24D10.1	7.46564	6.34989	2.66673	0.727281	3.66671	0.000245689	0.00143443
WBGene00010155	F56F3.4	F56F3.4	11.6409	6.34242	2.66503	0.563963	4.72555	2.29e-06	2.33e-05
WBGene00011911	T22B3.3	T22B3.3	13.7608	6.33484	2.66331	0.519273	5.12891	2.91e-07	3.55e-06
WBGene00018458	fbxb-30	F45D11.13	4.70069	6.33234	2.66274	1.0778	2.47053	0.0134914	0.0416009
WBGene00017114	E03H12.7	E03H12.7	8.02503	6.32314	2.66064	0.743096	3.58048	0.000342965	0.00191541
WBGene00021968	Y57G7A.5	Y57G7A.5	6.63	6.32241	2.66047	0.764473	3.48014	0.000501149	0.00266262
WBGene00010728	K09G1.2	K09G1.2	4.2422	6.31944	2.6598	0.979213	2.71626	0.00660241	0.0230416
WBGene00017851	F27C1.1	F27C1.1	89.679	6.31375	2.6585	0.227204	11.7009	1.26e-31	1.95e-29
WBGene00001458	flp-15	ZK525.1	16.2473	6.3132	2.65837	0.467708	5.68383	1.32e-08	2.1e-07
WBGene00011795	T16A9.5	T16A9.5	38.6594	6.26773	2.64794	0.342168	7.73872	1e-14	3.88e-13
WBGene00016420	C34G6.3	C34G6.3	6.8587	6.25706	2.64549	0.777685	3.40175	0.000669567	0.0034094
WBGene00003758	nlp-20	F45E4.8	90.0934	6.2446	2.64261	0.215479	12.2639	1.42e-34	2.75e-32
WBGene00022500	lfi-1	ZC8.4	1380.86	6.24122	2.64183	0.0644546	40.9874	0	0
WBGene00021207	Y18H1A.1	Y18H1A.1	11.4682	6.2404	2.64164	0.593512	4.45086	8.55e-06	7.6e-05
WBGene00017059	msrp-5	D2062.7	13.3839	6.23998	2.64154	0.56437	4.68051	2.86e-06	2.87e-05
WBGene00013290	Y57G11A.2	Y57G11A.2	61.8831	6.23122	2.63952	0.257992	10.231	1.44e-24	1.38e-22
WBGene00013657	Y105C5B.18	Y105C5B.18	6.22645	6.19347	2.63075	0.829064	3.17315	0.00150793	0.00675166
WBGene00015106	B0280.11	B0280.11	6.20188	6.1914	2.63026	0.772865	3.40326	0.00066586	0.00339622
WBGene00010091	ssp-35	F55C5.1	23.4282	6.19097	2.63017	0.395008	6.65851	2.77e-11	6.64e-10
WBGene00021600	Y46H3A.4	Y46H3A.4	3.76475	6.19006	2.62995	1.00231	2.62388	0.00869337	0.0290302
WBGene00022632	ZC581.2	ZC581.2	5.1736	6.17912	2.6274	0.831116	3.16129	0.0015707	0.00698937
WBGene00009149	F26D2.10	F26D2.10	6.27475	6.17753	2.62703	0.800074	3.28349	0.00102532	0.00487717
WBGene00017677	asp-11	F21F8.2	3.96308	6.17421	2.62625	0.942629	2.78609	0.00533473	0.0194169
WBGene00020187	gsp-4	T03F1.5	37.4434	6.17229	2.62581	0.329314	7.97357	1.54e-15	6.37e-14
WBGene00044728	Y53F4B.45	Y53F4B.45	63.0248	6.16781	2.62476	0.27591	9.51308	1.85e-21	1.38e-19
WBGene00008874	F15H10.7	F15H10.7	5.27754	6.13963	2.61815	0.865603	3.02466	0.00248915	0.0102721
WBGene00206522	F14D2.19	F14D2.19	9.71407	6.13119	2.61617	0.597994	4.37491	1.21e-05	0.000103283
WBGene00015987	C18G1.9	C18G1.9	6.57918	6.12869	2.61558	0.786374	3.32612	0.000880628	0.00428153
WBGene00008063	C41G7.6	C41G7.6	12.4024	6.12839	2.61551	0.564919	4.62988	3.66e-06	3.58e-05
WBGene00008801	acp-3	F14E5.3	7.30548	6.11928	2.61336	0.729034	3.58469	0.000337475	0.00188961
WBGene00015929	C17H12.3	C17H12.3	12.3981	6.11844	2.61316	0.551411	4.73905	2.15e-06	2.2e-05
WBGene00020741	dlhd-1	T23F4.3	6.02083	6.11089	2.61138	0.76912	3.39528	0.000685572	0.00347341
WBGene00010072	F54F12.1	F54F12.1	4.45855	6.10896	2.61093	0.910717	2.86689	0.00414526	0.0157921
WBGene00018895	F55F8.7	F55F8.7	5.19136	6.1078	2.61065	0.878589	2.97142	0.00296431	0.0118682
WBGene00007307	spch-1	C04G2.8	50.6736	6.08495	2.60524	0.289371	9.00313	2.19e-19	1.34e-17
WBGene00014246	ZK1307.3	ZK1307.3	3.61185	6.07468	2.60281	1.00664	2.58563	0.00972006	0.0318792
WBGene00016707	C46E10.1	C46E10.1	11.1908	6.07193	2.60216	0.614245	4.23635	2.27e-05	0.000178987
WBGene00010486	K01H12.4	K01H12.4	19.2203	6.06728	2.60105	0.462414	5.62494	1.86e-08	2.85e-07
WBGene00011321	fil-1	T01C3.4	11.4615	6.06471	2.60044	0.58004	4.48321	7.35e-06	6.66e-05
WBGene00009681	gipc-2	F44D12.4	163.337	6.05681	2.59856	0.16225	16.0157	9.92e-58	9.41e-55
WBGene00022621	ZC477.7	ZC477.7	10.9698	6.05233	2.59749	0.580767	4.47252	7.73e-06	6.95e-05
WBGene00003890	osm-10	T20H4.1	3.09808	6.05063	2.59709	1.04728	2.47983	0.0131445	0.0407715
WBGene00018301	F41G3.5	F41G3.5	5.30366	6.05007	2.59695	0.835853	3.10695	0.00189029	0.00818585
WBGene00010773	K11E4.1	K11E4.1	4.42182	6.04631	2.59605	0.958107	2.70957	0.00673712	0.0234148
WBGene00009581	F40F9.3	F40F9.3	19.4058	6.04203	2.59503	0.505039	5.13828	2.77e-07	3.41e-06
WBGene00008235	C50F4.10	C50F4.10	6.67785	6.04103	2.5948	0.764272	3.39512	0.000685983	0.00347433
WBGene00013033	Y49E10.10	Y49E10.10	10.6452	6.02774	2.59162	0.576494	4.49549	6.94e-06	6.33e-05
WBGene00018347	F42C5.5	F42C5.5	8.54028	6.012	2.58785	0.678253	3.81546	0.00013593	0.000853022
WBGene00013696	Y106G6A.4	Y106G6A.4	35.1161	5.98828	2.58214	0.332682	7.7616	8.39e-15	3.25e-13
WBGene00194703	F26B1.8	F26B1.8	51.5625	5.98725	2.58189	0.279143	9.24935	2.26e-20	1.52e-18
WBGene00022707	ZK354.6	ZK354.6	6.41382	5.98621	2.58164	0.804549	3.20881	0.00133287	0.00608269
WBGene00007274	C03C11.1	C03C11.1	9.35105	5.97509	2.57896	0.641604	4.01955	5.83e-05	0.000405862
WBGene00022157	Y71G12B.22	Y71G12B.22	4.04202	5.96526	2.57659	0.939334	2.74299	0.00608823	0.0215795
WBGene00009458	F36A2.11	F36A2.11	5.14145	5.96434	2.57636	0.846621	3.04311	0.00234145	0.00978225
WBGene00008230	pfk-1.2	C50F4.2	6.38236	5.96197	2.57579	0.766038	3.36248	0.000772452	0.00384332
WBGene00007610	C15H7.3	C15H7.3	7.2505	5.95772	2.57476	0.734965	3.50324	0.000459629	0.00247555
WBGene00015572	C07G1.6	C07G1.6	6.2249	5.95262	2.57352	0.832822	3.09013	0.00200071	0.00858343
WBGene00004901	snf-2	F55H12.1	5.80968	5.9195	2.56547	0.79282	3.23589	0.00121265	0.00560488
WBGene00018730	F53A9.7	F53A9.7	9.59141	5.9152	2.56443	0.61523	4.16824	3.07e-05	0.00023512
WBGene00009724	F45D3.4	F45D3.4	193.949	5.90506	2.56195	0.1606	15.9524	2.74e-57	2.31e-54
WBGene00020362	fbxb-10	T08E11.6	8.80445	5.90159	2.5611	0.830126	3.0852	0.00203417	0.00869882
WBGene00009948	F52H3.6	F52H3.6	21.1156	5.89936	2.56056	0.434163	5.8977	3.69e-09	6.5e-08
WBGene00006058	sst-20	F54C1.9	5.83162	5.89351	2.55913	0.866416	2.95369	0.00313995	0.0124759
WBGene00018297	F41F3.3	F41F3.3	7.28022	5.88379	2.55675	0.816968	3.12955	0.00175072	0.00764699
WBGene00021398	Y38C1AA.7	Y38C1AA.7	80.4328	5.86656	2.55251	0.230392	11.079	1.59e-28	2.08e-26
WBGene00009884	F49C12.15	F49C12.15	123.424	5.8639	2.55186	0.198082	12.8829	5.62e-38	1.35e-35
WBGene00019151	pck-3	H04M03.1	12.9245	5.85711	2.55019	0.581336	4.38677	1.15e-05	9.84e-05
WBGene00015613	C08F1.10	C08F1.10	26.4745	5.84991	2.54841	0.856745	2.97453	0.00293437	0.0117701
WBGene00016512	C38C3.3	C38C3.3	13.5707	5.8457	2.54738	0.520594	4.89321	9.92e-07	1.09e-05
WBGene00018359	F42G8.8	F42G8.8	8.0658	5.83767	2.54539	0.735973	3.45854	0.000543108	0.00284963
WBGene00194700	B0025.5	B0025.5	13.4775	5.83485	2.5447	0.542681	4.68912	2.74e-06	2.76e-05
WBGene00021338	Y34F4.3	Y34F4.3	4.73298	5.83281	2.54419	0.970671	2.62107	0.00876555	0.0292391
WBGene00022143	Y71G12B.3	Y71G12B.3	3.37502	5.80038	2.53615	1.0225	2.48035	0.0131254	0.0407457
WBGene00016645	C44C1.6	C44C1.6	4.27266	5.79105	2.53383	0.971505	2.60815	0.00910342	0.0301276
WBGene00022753	ZK484.7	ZK484.7	5.27441	5.78657	2.53271	0.836153	3.029	0.00245364	0.0101532
WBGene00010651	K08C9.2	K08C9.2	25.1021	5.76315	2.52686	0.406527	6.21571	5.11e-10	1.01e-08
WBGene00022162	Y71G12B.27	Y71G12B.27	9.1696	5.76075	2.52626	0.622753	4.0566	4.98e-05	0.000351916
WBGene00015094	B0261.6	B0261.6	19.2205	5.75055	2.5237	0.442835	5.69896	1.21e-08	1.94e-07
WBGene00021002	W03F9.4	W03F9.4	17.2239	5.74636	2.52265	0.47834	5.27376	1.34e-07	1.75e-06
WBGene00007081	AH6.3	AH6.3	3.66984	5.74413	2.52209	1.00759	2.50309	0.0123115	0.0385583
WBGene00021969	Y57G7A.6	Y57G7A.6	25.4092	5.71671	2.51519	0.39169	6.42137	1.35e-10	2.91e-09
WBGene00011910	alg-3	T22B3.2	29.5142	5.71476	2.51469	0.371446	6.77	1.29e-11	3.3e-10
WBGene00008259	C52E4.7	C52E4.7	6.85682	5.70945	2.51335	0.769133	3.26777	0.00108397	0.00510994
WBGene00002193	kin-5	T13H10.1	10.4419	5.69428	2.50951	0.564176	4.44811	8.66e-06	7.69e-05
WBGene00022090	Y69A2AR.19	Y69A2AR.19	42.8642	5.69076	2.50862	0.302939	8.28094	1.22e-16	5.94e-15
WBGene00012404	Y6G8.2	Y6G8.2	55.5922	5.67483	2.50458	0.269248	9.3021	1.38e-20	9.54e-19
WBGene00010574	K04H4.5	K04H4.5	28.9708	5.67008	2.50337	0.382414	6.54624	5.9e-11	1.33e-09
WBGene00015937	C17H12.12	C17H12.12	24.412	5.63915	2.49548	0.40286	6.19441	5.85e-10	1.15e-08
WBGene00009028	F21H7.2	F21H7.2	12.167	5.61597	2.48954	0.558215	4.45981	8.2e-06	7.35e-05
WBGene00010723	cpg-7	K09E4.6	22.2716	5.61065	2.48817	0.40686	6.11554	9.62e-10	1.83e-08
WBGene00015634	C09D4.3	C09D4.3	13.2235	5.59566	2.48431	0.531489	4.67424	2.95e-06	2.94e-05
WBGene00015627	C09B9.2	C09B9.2	14.1501	5.59249	2.48349	0.512445	4.84635	1.26e-06	1.35e-05
WBGene00015820	C16A11.7	C16A11.7	7.94715	5.57924	2.48007	0.670153	3.70075	0.000214963	0.00127665
WBGene00022487	fbxa-21	Y119D3B.9	6.90263	5.57548	2.4791	0.737987	3.35927	0.000781498	0.00388441
WBGene00043743	Y59E9AL.2	Y59E9AL.2	6.95381	5.55235	2.4731	0.697263	3.54686	0.000389844	0.00214097
WBGene00021381	Y37E11B.10	Y37E11B.10	30.109	5.55159	2.4729	0.367111	6.73611	1.63e-11	4.12e-10
WBGene00009959	F53B6.4	F53B6.4	87.7174	5.5411	2.47017	0.210086	11.7579	6.43e-32	1.03e-29
WBGene00235297	F56D6.20	F56D6.20	3.36899	5.54049	2.47001	1.0278	2.40321	0.0162521	0.0483736
WBGene00022732	ZK418.2	ZK418.2	5.79398	5.53723	2.46916	0.804519	3.06912	0.00214691	0.00910231
WBGene00013087	Y51B9A.5	Y51B9A.5	4.47696	5.52364	2.46562	0.88574	2.78368	0.00537456	0.0195338
WBGene00009503	F37A8.5	F37A8.5	21.4828	5.51186	2.46254	0.413644	5.95328	2.63e-09	4.72e-08
WBGene00008912	F17C8.7	F17C8.7	10.5204	5.5078	2.46148	0.611619	4.02453	5.71e-05	0.000398108
WBGene00008950	wht-5	F19B6.4	4.9158	5.50367	2.4604	0.970607	2.5349	0.0112479	0.035841
WBGene00020353	T08B6.4	T08B6.4	34.7429	5.50247	2.46008	0.336237	7.31652	2.54e-13	8.06e-12
WBGene00013101	Y51H4A.5	Y51H4A.5	11.517	5.50147	2.45982	0.586062	4.1972	2.7e-05	0.000209532
WBGene00010933	M162.7	M162.7	11.2917	5.47886	2.45387	0.585067	4.19417	2.74e-05	0.00021224
WBGene00003465	msp-78	T13F2.11	26.8551	5.47772	2.45358	0.384737	6.37728	1.8e-10	3.8e-09
WBGene00019063	F58F12.3	F58F12.3	4.33223	5.46119	2.44921	0.91299	2.68263	0.00730457	0.0250202
WBGene00020659	T21G5.1	T21G5.1	7.14098	5.45854	2.44852	0.746189	3.28136	0.00103307	0.00490635
WBGene00007203	best-1	B0564.3	15.0256	5.45732	2.44819	0.48257	5.07324	3.91e-07	4.64e-06
WBGene00016659	C45B2.2	C45B2.2	9.13623	5.45625	2.44791	0.604983	4.04625	5.2e-05	0.000365472
WBGene00009344	F32H2.7	F32H2.7	35.3882	5.45607	2.44786	0.331614	7.38166	1.56e-13	5.07e-12
WBGene00008541	F07A5.2	F07A5.2	53.4293	5.44758	2.44561	0.274584	8.90661	5.26e-19	3.06e-17
WBGene00012172	W01B6.5	W01B6.5	4.14548	5.43656	2.44269	0.91872	2.6588	0.00784194	0.0265936
WBGene00016951	C55C3.1	C55C3.1	34.5381	5.42774	2.44035	0.312065	7.82002	5.28e-15	2.1e-13
WBGene00004987	spp-2	T08A9.12	292.036	5.42561	2.43979	0.132691	18.3869	1.67e-75	2.31e-72
WBGene00011176	R09E10.6	R09E10.6	135.404	5.42098	2.43855	0.188854	12.9123	3.83e-38	9.86e-36
WBGene00011798	T16G1.4	T16G1.4	70.5061	5.42077	2.4385	0.226147	10.7828	4.15e-27	5e-25
WBGene00009324	ttbk-3	F32B6.10	7.11351	5.41568	2.43714	0.728202	3.34679	0.00081752	0.00403285
WBGene00017975	F32B5.1	F32B5.1	7.06433	5.41394	2.43668	0.755397	3.22569	0.00125668	0.00578019
WBGene00015024	B0205.10	B0205.10	21.5775	5.40679	2.43477	0.40927	5.94906	2.7e-09	4.82e-08
WBGene00012180	W01D2.3	W01D2.3	5.91652	5.39782	2.43238	0.772625	3.1482	0.00164279	0.00724432
WBGene00016684	nlp-43	C45G9.13	13.9973	5.39334	2.43118	0.496993	4.89178	9.99e-07	1.1e-05
WBGene00007613	C15H11.1	C15H11.1	8.33318	5.38734	2.42957	0.700778	3.46697	0.000526367	0.00277878
WBGene00003446	msp-53	R13H9.4	13.3775	5.36807	2.4244	0.503765	4.81257	1.49e-06	1.58e-05
WBGene00022876	ZK1248.5	ZK1248.5	8.04055	5.36448	2.42344	0.684472	3.54059	0.000399228	0.00218481
WBGene00018732	F53A9.9	F53A9.9	4.19075	5.36439	2.42341	0.944691	2.5653	0.0103087	0.0333456
WBGene00007570	C14A6.6	C14A6.6	7.14044	5.34064	2.41701	0.742562	3.25496	0.00113407	0.00531121
WBGene00003755	nlp-17	Y45F10A.5	19.266	5.27976	2.40047	0.429894	5.58387	2.35e-08	3.54e-07
WBGene00000611	col-34	F36A4.10	34.6391	5.26919	2.39758	0.314994	7.61153	2.71e-14	9.76e-13
WBGene00021386	Y37F4.5	Y37F4.5	3.81953	5.25844	2.39464	0.948426	2.52485	0.0115747	0.0366864
WBGene00001944	his-70	E03A3.4	4.15417	5.25778	2.39445	0.979379	2.44487	0.0144905	0.0440374
WBGene00008154	C47E12.11	C47E12.11	7.39169	5.24699	2.39149	0.730027	3.27589	0.00105329	0.00498987
WBGene00022040	Y65B4BR.1	Y65B4BR.1	9.07341	5.2458	2.39116	0.62237	3.84203	0.000122022	0.000776987
WBGene00016339	C33C12.7	C33C12.7	4.89141	5.22931	2.38662	0.853437	2.79648	0.00516623	0.0189171
WBGene00017325	F10C1.3	F10C1.3	5.38003	5.22528	2.38551	0.80934	2.94748	0.0032038	0.0126864
WBGene00016398	C34D4.2	C34D4.2	4.4986	5.20763	2.38063	0.920791	2.58542	0.00972618	0.0318896
WBGene00013684	Y105E8A.27	Y105E8A.27	10.288	5.20049	2.37865	0.605408	3.929	8.53e-05	0.00056819
WBGene00012012	T25B9.6	T25B9.6	9.428	5.17231	2.37081	0.655236	3.61825	0.000296603	0.00169452
WBGene00009459	F36A2.12	F36A2.12	9.05367	5.1676	2.36949	0.626765	3.78051	0.000156505	0.00096419
WBGene00021472	Y39G10AR.16	Y39G10AR.16	15.7475	5.16049	2.36751	0.482296	4.90883	9.16e-07	1.02e-05
WBGene00017279	F09C12.8	F09C12.8	6.42724	5.15706	2.36655	0.734336	3.22271	0.00126985	0.00583016
WBGene00010241	F58D2.2	F58D2.2	20.1387	5.14538	2.36328	0.434847	5.43473	5.49e-08	7.72e-07
WBGene00019949	R08C7.5	R08C7.5	5.23909	5.14278	2.36255	0.825649	2.86144	0.00421717	0.0160018
WBGene00010265	F58G1.3	F58G1.3	14.3965	5.14035	2.36187	0.518067	4.559	5.14e-06	4.84e-05
WBGene00019785	M70.3	M70.3	15.219	5.10912	2.35307	0.485242	4.84928	1.24e-06	1.34e-05
WBGene00015516	C06A8.6	C06A8.6	12.8688	5.10911	2.35307	0.536159	4.38876	1.14e-05	9.77e-05
WBGene00016327	C32E12.1	C32E12.1	13.6328	5.10311	2.35138	0.501109	4.69235	2.7e-06	2.71e-05
WBGene00235383	ZK616.65	ZK616.65	3.73754	5.10155	2.35094	0.973805	2.41417	0.0157709	0.0472193
WBGene00003438	msp-45	F58A6.8	38.3581	5.09039	2.34778	0.327885	7.16036	8.05e-13	2.38e-11
WBGene00022032	Y65B4A.9	Y65B4A.9	7.76855	5.09004	2.34768	0.700187	3.35293	0.000799614	0.00396385
WBGene00003435	msp-40	C33F10.9	43.9294	5.08305	2.34569	0.310759	7.54827	4.41e-14	1.55e-12
WBGene00018004	F33D11.7	F33D11.7	3.57075	5.06959	2.34187	0.954841	2.45263	0.0141817	0.0433071
WBGene00012173	W01B6.6	W01B6.6	4.67697	5.0606	2.33931	0.912203	2.56446	0.0103337	0.0334052
WBGene00007946	ugt-33	C35A5.2	8.13494	5.05216	2.3369	0.655502	3.56506	0.00036378	0.00201019
WBGene00012294	nspa-8	W06A7.5	9.10268	5.05011	2.33631	0.618675	3.77632	0.000159164	0.000976092
WBGene00014240	htas-1	ZK1251.1	15.8967	5.04865	2.3359	0.485424	4.81208	1.49e-06	1.58e-05
WBGene00019430	K06A5.2	K06A5.2	75.5582	5.04781	2.33566	0.244552	9.55074	1.29e-21	9.77e-20
WBGene00017550	nep-6	F18A12.1	4.54619	5.04327	2.33436	0.877894	2.65904	0.0078363	0.0265894
WBGene00016358	C33F10.12	C33F10.12	17.4545	5.02856	2.33014	0.455834	5.11182	3.19e-07	3.86e-06
WBGene00017175	irld-3	F02C9.4	6.61775	5.01073	2.32502	0.75614	3.07486	0.00210604	0.00895655
WBGene00021579	clec-73	Y46C8AL.1	21.5136	5.00579	2.3236	0.394579	5.8888	3.89e-09	6.84e-08
WBGene00007460	C08F11.13	C08F11.13	153.243	4.97837	2.31567	0.174994	13.2329	5.67e-40	1.69e-37
WBGene00009042	F22B5.4	F22B5.4	7.03786	4.9697	2.31316	0.701803	3.29602	0.000980641	0.00469853
WBGene00019015	F57F4.1	F57F4.1	11.6081	4.96965	2.31315	0.577112	4.00814	6.12e-05	0.000421957
WBGene00009143	F26A3.5	F26A3.5	7.4968	4.96845	2.31279	0.733076	3.15492	0.00160542	0.00711676
WBGene00004965	spe-11	F48C1.7	22.5482	4.95967	2.31024	0.399038	5.78953	7.06e-09	1.17e-07
WBGene00022709	ZK354.8	ZK354.8	8.90842	4.94923	2.3072	0.62552	3.68846	0.000225618	0.00133263
WBGene00007584	C14C10.1	C14C10.1	33.0063	4.94035	2.30461	0.341688	6.74478	1.53e-11	3.89e-10
WBGene00001564	icl-1	C05E4.9	2260.36	4.92354	2.29969	0.180839	12.7168	4.77e-37	1.05e-34
WBGene00009090	fipr-3	F23D12.6	4.38999	4.91062	2.29591	0.94681	2.42489	0.0153132	0.046058
WBGene00016351	C33F10.1	C33F10.1	62.9	4.89389	2.29098	0.253684	9.03083	1.7e-19	1.05e-17
WBGene00009957	F53B2.8	F53B2.8	78.2628	4.88234	2.28757	0.226282	10.1094	5.02e-24	4.64e-22
WBGene00008312	C54G4.2	C54G4.2	4.3761	4.8695	2.28377	0.913807	2.49919	0.0124479	0.0389291
WBGene00020116	moa-1	R155.2	18.3969	4.86068	2.28116	0.44671	5.10658	3.28e-07	3.95e-06
WBGene00011171	R09E10.1	R09E10.1	7.72577	4.85641	2.27989	0.663471	3.43631	0.000589696	0.00306335
WBGene00016357	C33F10.11	C33F10.11	17.3137	4.85612	2.2798	0.512162	4.45134	8.53e-06	7.59e-05
WBGene00013999	ZK550.5	ZK550.5	21.9288	4.85504	2.27948	0.430309	5.29731	1.18e-07	1.56e-06
WBGene00006956	wrt-10	ZK1290.8	19.1385	4.85315	2.27892	0.578561	3.93895	8.18e-05	0.000547788
WBGene00017112	E03H12.5	E03H12.5	28.7701	4.85312	2.27891	0.34958	6.51899	7.08e-11	1.58e-09
WBGene00013142	Y53C12A.7	Y53C12A.7	4.08303	4.85151	2.27843	0.930589	2.44838	0.0143501	0.0437071
WBGene00017673	icmt-1	F21F3.3	5.99745	4.84277	2.27583	0.760498	2.99256	0.00276651	0.0112343
WBGene00019783	M70.1	M70.1	8.89589	4.83056	2.27219	0.6439	3.52879	0.00041746	0.00227208
WBGene00016698	C46A5.1	C46A5.1	12.6853	4.82247	2.26977	0.547441	4.14614	3.38e-05	0.000253866
WBGene00016742	C48B6.4	C48B6.4	11.8156	4.81156	2.2665	0.574658	3.94409	8.01e-05	0.000537351
WBGene00007601	C15C6.2	C15C6.2	61.2706	4.81041	2.26616	0.253675	8.9333	4.13e-19	2.44e-17
WBGene00015467	basl-1	C05D2.3	7.89111	4.80817	2.26549	0.672599	3.36826	0.000756444	0.00377575
WBGene00012629	slc-36.3	Y38H6C.17	4.73372	4.80382	2.26418	0.876323	2.58373	0.00977379	0.0320249
WBGene00020589	T19H12.3	T19H12.3	14.5537	4.80267	2.26384	0.467447	4.84299	1.28e-06	1.37e-05
WBGene00021007	W03F11.4	W03F11.4	23.5702	4.79536	2.26164	0.416442	5.43085	5.61e-08	7.88e-07
WBGene00020105	R148.7	R148.7	14.5138	4.77576	2.25573	0.528713	4.26646	1.99e-05	0.000159197
WBGene00017978	msrp-1	F32B5.4	15.1252	4.76591	2.25275	0.506967	4.44359	8.85e-06	7.83e-05
WBGene00001828	hch-1	F40E10.1	11.6344	4.76069	2.25117	0.89057	2.52779	0.0114784	0.0364533
WBGene00017647	F20H11.4	F20H11.4	14.536	4.75621	2.24981	0.480742	4.67988	2.87e-06	2.87e-05
WBGene00015044	cyp-34A9	B0213.15	273.077	4.73324	2.24283	0.248779	9.01534	1.96e-19	1.21e-17
WBGene00013304	Y57G11C.6	Y57G11C.6	8.08813	4.73227	2.24253	0.627986	3.57099	0.000355628	0.0019745
WBGene00000457	ceh-36	C37E2.4	8.95306	4.72913	2.24157	0.781467	2.86842	0.0041253	0.015728
WBGene00014029	ZK637.12	ZK637.12	4.42056	4.71625	2.23764	0.871507	2.56755	0.0102419	0.0331841
WBGene00021858	Y54F10BM.3	Y54F10BM.3	24.0121	4.70075	2.23289	0.383047	5.82928	5.57e-09	9.45e-08
WBGene00016083	C25A8.2	C25A8.2	6.23243	4.66367	2.22147	0.827113	2.68581	0.0072355	0.0248285
WBGene00013303	Y57G11C.5	Y57G11C.5	13.8643	4.65796	2.2197	0.523565	4.23959	2.24e-05	0.000176977
WBGene00015765	C14C11.1	C14C11.1	8.44923	4.65597	2.21908	0.691942	3.20704	0.00134111	0.00611477
WBGene00000771	cpb-2	C30B5.3	7.66897	4.6529	2.21813	0.67717	3.27559	0.00105442	0.00499369
WBGene00009895	scl-2	F49E11.10	313.573	4.64553	2.21584	0.219534	10.0934	5.91e-24	5.4e-22
WBGene00016416	C34F11.5	C34F11.5	25.8183	4.63425	2.21234	0.394833	5.60322	2.1e-08	3.2e-07
WBGene00011918	T22C1.8	T22C1.8	17.7356	4.63014	2.21106	0.445455	4.96359	6.92e-07	7.86e-06
WBGene00003444	msp-51	ZK354.5	15.0569	4.60289	2.20254	0.461614	4.77139	1.83e-06	1.9e-05
WBGene00016440	gipc-1	C35D10.2	140.511	4.59942	2.20145	0.259562	8.4814	2.22e-17	1.16e-15
WBGene00008529	F02E9.3	F02E9.3	17.2284	4.59143	2.19894	0.458863	4.79216	1.65e-06	1.73e-05
WBGene00020117	R155.3	R155.3	4.1616	4.5912	2.19887	0.887978	2.47627	0.0132764	0.0411051
WBGene00015689	spch-2	C10G11.9	7.50841	4.5886	2.19805	0.679766	3.23354	0.00122265	0.00564762
WBGene00010514	K02E11.5	K02E11.5	6.82633	4.56744	2.19139	0.708892	3.09128	0.00199293	0.00855708
WBGene00016468	C36B7.5	C36B7.5	5.05575	4.54933	2.18565	0.847851	2.57788	0.00994098	0.0324327
WBGene00013104	Y51H4A.8	Y51H4A.8	18.7671	4.54787	2.18519	0.432531	5.0521	4.37e-07	5.12e-06
WBGene00016388	C34B2.3	C34B2.3	5.23948	4.5371	2.18177	0.869012	2.51063	0.0120515	0.0378926
WBGene00018083	F36A4.4	F36A4.4	9.86258	4.53672	2.18165	0.595899	3.66111	0.000251126	0.00146112
WBGene00000019	abt-1	C24F3.5	15.1454	4.53554	2.18128	0.467627	4.66457	3.09e-06	3.06e-05
WBGene00016125	C26B2.2	C26B2.2	4.91774	4.53376	2.18071	0.81972	2.66031	0.00780689	0.0265015
WBGene00020084	R105.1	R105.1	15.7518	4.5317	2.18005	0.481429	4.52829	5.95e-06	5.5e-05
WBGene00010679	K08F4.5	K08F4.5	5.831	4.53095	2.17981	0.793393	2.74746	0.00600588	0.0213577
WBGene00012689	Y39B6A.30	Y39B6A.30	9.83207	4.52403	2.17761	0.571859	3.80795	0.000140123	0.000874989
WBGene00000653	col-77	M195.1	7.07885	4.5192	2.17607	0.756769	2.87547	0.00403424	0.0154118
WBGene00009429	irg-5	F35E12.5	16.6355	4.50708	2.17219	0.443828	4.89423	9.87e-07	1.09e-05
WBGene00006409	hdl-2	C09G9.4	5.51392	4.49927	2.16969	0.783409	2.76955	0.00561339	0.0202034
WBGene00016414	C34F11.2	C34F11.2	8.86877	4.496	2.16864	0.63474	3.41659	0.000634115	0.00326195
WBGene00003739	nlp-1	C01C4.1	8.84299	4.47663	2.16241	0.614791	3.51731	0.00043594	0.00235827
WBGene00006056	sss-1	F32B6.5	59.689	4.46929	2.16005	0.243977	8.85349	8.48e-19	4.86e-17
WBGene00014169	ZK945.7	ZK945.7	32.326	4.4663	2.15908	0.325055	6.6422	3.09e-11	7.33e-10
WBGene00011699	cyp-34A2	T10H4.11	7.12961	4.42929	2.14708	0.754093	2.84723	0.00441013	0.0165724
WBGene00002186	kel-10	T16H12.6	17.9574	4.40473	2.13905	0.470575	4.54562	5.48e-06	5.1e-05
WBGene00014158	ZK938.1	ZK938.1	49.1776	4.39989	2.13747	0.260113	8.21745	2.08e-16	9.8e-15
WBGene00017208	fbxb-35	F07E5.2	9.18901	4.39948	2.13733	0.748294	2.85627	0.00428648	0.016196
WBGene00010612	K07A1.5	K07A1.5	5.94686	4.39514	2.13591	0.778484	2.74368	0.00607549	0.0215497
WBGene00016424	C34H4.1	C34H4.1	31.7942	4.39127	2.13464	0.324246	6.58339	4.6e-11	1.06e-09
WBGene00014197	ZK1053.2	ZK1053.2	12.7128	4.36867	2.1272	0.522891	4.06814	4.74e-05	0.000337919
WBGene00011919	T22C1.9	T22C1.9	9.827	4.36003	2.12434	0.62578	3.3947	0.000687038	0.00347735
WBGene00021586	clec-75	Y46C8AL.9	9.14435	4.35819	2.12373	0.611542	3.47274	0.000515166	0.00272849
WBGene00019410	K05F1.9	K05F1.9	13.8545	4.34768	2.12025	0.489038	4.33554	1.45e-05	0.000121093
WBGene00007778	C27D8.2	C27D8.2	23.4887	4.34599	2.11968	0.412238	5.14189	2.72e-07	3.35e-06
WBGene00000601	col-12	F15H10.1	11.0904	4.34116	2.11808	0.563908	3.75607	0.000172601	0.00104888
WBGene00008602	oac-14	F09B9.1	21.6394	4.33941	2.1175	0.419674	5.04559	4.52e-07	5.29e-06
WBGene00175035	F54C9.14	F54C9.14	8.51702	4.32962	2.11424	0.640074	3.30312	0.000956157	0.00459573
WBGene00018930	F56B3.6	F56B3.6	17.6876	4.30651	2.10652	0.436026	4.83118	1.36e-06	1.45e-05
WBGene00007440	C08E8.4	C08E8.4	7.40872	4.30294	2.10532	0.645872	3.25965	0.00111548	0.00523547
WBGene00018195	btb-16	F39E9.2	26.7275	4.30254	2.10519	0.359321	5.85881	4.66e-09	8.08e-08
WBGene00016825	C50E10.1	C50E10.1	10.1822	4.28333	2.09873	0.569386	3.68595	0.000227847	0.00134266
WBGene00011748	T13F2.9	T13F2.9	26.3176	4.28292	2.09859	0.38873	5.39859	6.72e-08	9.31e-07
WBGene00009457	F36A2.10	F36A2.10	28.4403	4.27706	2.09662	0.342048	6.1296	8.81e-10	1.69e-08
WBGene00011493	T05F1.8	T05F1.8	12.6752	4.2603	2.09095	0.509766	4.10179	4.1e-05	0.000299651
WBGene00009016	F21D9.2	F21D9.2	7.35721	4.25812	2.09022	0.715072	2.92309	0.00346581	0.0135228
WBGene00013107	Y51H4A.13	Y51H4A.13	5.45414	4.25624	2.08958	0.783478	2.66705	0.00765192	0.0260481
WBGene00000096	ahr-1	C41G7.5	5.37206	4.24417	2.08548	0.826534	2.52316	0.0116304	0.036805
WBGene00021532	Y42G9A.2	Y42G9A.2	11.4101	4.24373	2.08533	0.52608	3.96391	7.37e-05	0.000497878
WBGene00003750	nlp-12	M01D7.5	32.2382	4.23815	2.08343	0.312724	6.66221	2.7e-11	6.49e-10
WBGene00045417	Y37H2A.13	Y37H2A.13	5.12075	4.2371	2.08308	0.827813	2.51636	0.0118574	0.0373673
WBGene00017553	nep-8	F18A12.4	9.92885	4.23653	2.08288	0.611876	3.40409	0.000663841	0.0033882
WBGene00016322	C32E8.4	C32E8.4	9.9032	4.23188	2.0813	0.613235	3.39396	0.000688888	0.00348324
WBGene00012547	Y37D8A.5	Y37D8A.5	5.96053	4.21183	2.07445	0.770688	2.69168	0.00710923	0.0244949
WBGene00008433	marc-2	D2089.2	4.59146	4.21098	2.07416	0.85077	2.43798	0.0147698	0.0447306
WBGene00016058	nspd-3	C24D10.7	15.4181	4.20885	2.07342	0.494845	4.19005	2.79e-05	0.000215589
WBGene00269388	F45C12.17	F45C12.17	7.60426	4.20861	2.07334	0.797	2.60143	0.00928353	0.0306635
WBGene00007354	C06A1.3	C06A1.3	14.7722	4.20253	2.07126	0.470699	4.40039	1.08e-05	9.33e-05
WBGene00017529	F16G10.15	F16G10.15	12.5381	4.19738	2.06949	0.574507	3.6022	0.000315537	0.00178788
WBGene00012169	ttbk-4	W01B6.2	14.6273	4.19434	2.06844	0.498126	4.15245	3.29e-05	0.000248194
WBGene00007448	C08F8.6	C08F8.6	13.4546	4.18606	2.06559	0.509393	4.05501	5.01e-05	0.000354143
WBGene00003747	nlp-9	E03D2.2	14.7786	4.16358	2.05783	0.47237	4.35638	1.32e-05	0.000111099
WBGene00022623	ZC487.1	ZC487.1	22.2689	4.15992	2.05656	0.375214	5.48102	4.23e-08	6.09e-07
WBGene00010290	F58H1.7	F58H1.7	16.4594	4.15787	2.05584	0.43806	4.69307	2.69e-06	2.71e-05
WBGene00007320	C05B5.2	C05B5.2	21.2509	4.13692	2.04856	0.403459	5.07748	3.82e-07	4.54e-06
WBGene00044280	W02A2.9	W02A2.9	21.4307	4.13338	2.04732	0.450227	4.54731	5.43e-06	5.07e-05
WBGene00010920	M117.4	M117.4	5.9417	4.13025	2.04623	0.777799	2.63079	0.00851856	0.0285407
WBGene00007733	smz-1	C25G4.6	65.0525	4.107	2.03809	0.234759	8.68162	3.9e-18	2.13e-16
WBGene00016085	C25A8.5	C25A8.5	6.76894	4.10673	2.03799	0.718306	2.83722	0.00455087	0.0170422
WBGene00001463	flp-20	E01H11.3	8.51684	4.10343	2.03683	0.598759	3.40175	0.000669557	0.0034094
WBGene00019090	F59A7.2	F59A7.2	5.69759	4.10174	2.03624	0.719334	2.83072	0.00464427	0.017315
WBGene00017303	F09F7.6	F09F7.6	57.4995	4.10134	2.03609	0.265146	7.67913	1.6e-14	5.96e-13
WBGene00011708	T11B7.5	T11B7.5	14.0918	4.08987	2.03205	0.491496	4.13443	3.56e-05	0.000264943
WBGene00009548	F38H4.4	F38H4.4	12.1675	4.08384	2.02993	0.553472	3.66762	0.000244817	0.00143099
WBGene00017179	wht-4	F02E11.1	4.76398	4.08285	2.02958	0.833933	2.43374	0.0149436	0.0451882
WBGene00000720	col-147	T06E4.4	35.9622	4.07793	2.02784	0.321312	6.3111	2.77e-10	5.7e-09
WBGene00044633	F54H12.7	F54H12.7	10.1165	4.07645	2.02731	0.60622	3.34418	0.000825248	0.00406437
WBGene00013452	Y67A10A.3	Y67A10A.3	5.81304	4.07616	2.02721	0.765972	2.64658	0.00813091	0.0274357
WBGene00001487	frk-1	T04B2.2	8.22194	4.06886	2.02462	0.692815	2.92231	0.00347441	0.0135529
WBGene00006039	ssp-10	K07F5.9	55.8616	4.06095	2.02182	0.250078	8.08475	6.23e-16	2.73e-14
WBGene00016800	C50C3.2	C50C3.2	13.0379	4.05771	2.02067	0.497826	4.05899	4.93e-05	0.00034882
WBGene00023490	F36A2.14	F36A2.14	16.66	4.05164	2.01851	0.455746	4.42902	9.47e-06	8.31e-05
WBGene00009835	F47H4.2	F47H4.2	38.2281	4.04771	2.0171	0.309551	6.51622	7.21e-11	1.61e-09
WBGene00020293	nep-20	T06D4.4	5.43694	4.04479	2.01606	0.821915	2.45288	0.0141716	0.0432849
WBGene00001476	fmo-1	K08C7.2	88.125	4.03848	2.01381	0.203333	9.90403	4e-23	3.47e-21
WBGene00044529	irld-1	D2063.4	5.51785	4.0309	2.0111	0.766456	2.6239	0.00869302	0.0290302
WBGene00009839	fbxa-188	F47H4.8	10.4016	4.02189	2.00787	0.583823	3.43918	0.00058347	0.00303621
WBGene00010795	M01A8.1	M01A8.1	25.4378	4.01844	2.00664	0.362584	5.53427	3.13e-08	4.61e-07
WBGene00019260	H34I24.1	H34I24.1	6.24442	4.00882	2.00318	0.701323	2.85628	0.00428633	0.016196
WBGene00007957	C35C5.8	C35C5.8	47.912	3.99618	1.99862	0.271264	7.36782	1.73e-13	5.61e-12
WBGene00021288	clec-123	Y25C1A.1	21.0681	3.98749	1.99548	0.413447	4.82645	1.39e-06	1.48e-05
WBGene00021337	Y34F4.2	Y34F4.2	10.3725	3.98744	1.99546	0.575789	3.46561	0.000529024	0.00278826
WBGene00017600	ttr-10	F19F10.4	32.0766	3.97328	1.99033	0.314331	6.33196	2.42e-10	5.03e-09
WBGene00013723	Y106G6H.13	Y106G6H.13	24.6122	3.96208	1.98626	0.394188	5.03887	4.68e-07	5.46e-06
WBGene00008820	nlp-55	F14F11.2	9.13326	3.96162	1.98609	0.62324	3.18672	0.00143895	0.0064926
WBGene00009605	F40G12.10	F40G12.10	10.3109	3.95626	1.98414	0.578417	3.43029	0.000602936	0.00312251
WBGene00044684	T08G11.2	T08G11.2	6.30888	3.94351	1.97948	0.718558	2.75479	0.00587294	0.0209734
WBGene00013987	ZK512.8	ZK512.8	17.7801	3.93458	1.97621	0.431958	4.57501	4.76e-06	4.52e-05
WBGene00016612	C43G2.3	C43G2.3	7.73335	3.93409	1.97603	0.650567	3.03739	0.00238633	0.0099342
WBGene00011974	xbx-5	T24A11.2	9.59884	3.93005	1.97455	0.580249	3.40294	0.000666661	0.00339916
WBGene00012138	T28F4.3	T28F4.3	9.00265	3.92523	1.97278	0.619411	3.18493	0.00144791	0.00652139
WBGene00007986	C36F7.5	C36F7.5	5.45771	3.92328	1.97206	0.766208	2.57379	0.0100591	0.0327548
WBGene00010366	H05L14.1	H05L14.1	18.6003	3.92073	1.97112	0.434512	4.53641	5.72e-06	5.31e-05
WBGene00014179	ZK1010.5	ZK1010.5	18.5799	3.91988	1.97081	0.453667	4.34418	1.4e-05	0.00011683
WBGene00018563	F47D12.7	F47D12.7	14.5594	3.91082	1.96747	0.502798	3.91305	9.11e-05	0.000602051
WBGene00018158	comp-1	F37E3.3	8.90292	3.90675	1.96597	0.58641	3.35255	0.000800713	0.00396721
WBGene00044300	D1022.9	D1022.9	4.87291	3.90534	1.96545	0.818885	2.40015	0.0163883	0.0487068
WBGene00077775	nlp-58	T07C12.15	11.7858	3.88169	1.95668	0.511869	3.82262	0.000132039	0.000831698
WBGene00013713	Y106G6G.4	Y106G6G.4	31.9639	3.87804	1.95533	0.331244	5.90299	3.57e-09	6.31e-08
WBGene00022816	fbn-1	ZK783.1	56.2202	3.85342	1.94614	0.312403	6.22958	4.68e-10	9.31e-09
WBGene00008313	C54G4.3	C54G4.3	6.19098	3.85124	1.94532	0.722862	2.69114	0.00712077	0.0245291
WBGene00009471	F36D3.5	F36D3.5	6.82406	3.84065	1.94135	0.693996	2.79735	0.00515238	0.01888
WBGene00007397	C07A4.2	C07A4.2	6.03112	3.8309	1.93768	0.757006	2.55967	0.0104773	0.0337829
WBGene00021214	hasp-2	Y18H1A.10	6.74862	3.82279	1.93463	0.732058	2.64272	0.00822419	0.0277135
WBGene00009156	clec-196	F26D10.12	30.6115	3.8151	1.93172	0.415224	4.65224	3.28e-06	3.23e-05
WBGene00020580	T19D12.5	T19D12.5	5.83009	3.80225	1.92685	0.764917	2.51904	0.0117676	0.0371772
WBGene00007763	C27B7.6	C27B7.6	5.94761	3.80172	1.92665	0.738914	2.60741	0.00912295	0.0301857
WBGene00019092	F59A7.5	F59A7.5	5.77015	3.77907	1.91803	0.726468	2.64022	0.00828534	0.0278824
WBGene00013449	Y67A6A.1	Y67A6A.1	5.94477	3.77446	1.91627	0.77908	2.45966	0.0139069	0.0426396
WBGene00006509	tag-164	Y76A2A.1	16.0635	3.75305	1.90807	0.443498	4.3023	1.69e-05	0.000138417
WBGene00011850	T20B3.1	T20B3.1	100.948	3.75101	1.90728	0.19364	9.84961	6.88e-23	5.83e-21
WBGene00021862	fbxa-48	Y54F10BM.7	6.04997	3.72993	1.89915	0.779	2.43793	0.0147717	0.0447306
WBGene00009005	F21C3.6	F21C3.6	5.71124	3.72786	1.89835	0.780716	2.43155	0.0150345	0.0454359
WBGene00014082	ZK795.2	ZK795.2	16.1217	3.72274	1.89637	0.464682	4.081	4.48e-05	0.000323991
WBGene00012637	Y38H8A.3	Y38H8A.3	17.8692	3.71472	1.89325	0.432831	4.37412	1.22e-05	0.000103411
WBGene00012296	spe-46	W06D4.2	15.084	3.70924	1.89112	0.472341	4.00372	6.24e-05	0.000428644
WBGene00016462	C35E7.10	C35E7.10	13.8511	3.70066	1.88778	0.499613	3.77849	0.000157783	0.000970361
WBGene00013103	Y51H4A.7	Y51H4A.7	196.66	3.69468	1.88545	0.127239	14.8182	1.12e-49	6.78e-47
WBGene00021787	Y51H7C.9	Y51H7C.9	9.35614	3.69285	1.88473	0.63723	2.9577	0.00309945	0.0123344
WBGene00012781	nspd-7	Y43C5A.1	38.5789	3.68724	1.88254	0.300511	6.26446	3.74e-10	7.62e-09
WBGene00017290	F09E5.12	F09E5.12	6.3971	3.68266	1.88075	0.691045	2.7216	0.00649669	0.0227459
WBGene00119203	T04A8.18	T04A8.18	6.19011	3.67947	1.8795	0.752069	2.4991	0.0124509	0.0389304
WBGene00195060	linc-14	C18D4.11	6.61396	3.67074	1.87607	0.681012	2.75483	0.00587232	0.0209734
WBGene00009056	F22D6.15	F22D6.15	7.11533	3.66589	1.87416	0.646342	2.89965	0.00373585	0.0144277
WBGene00010062	lipl-1	F54F3.3	189.389	3.66397	1.87341	0.140369	13.3463	1.24e-40	3.93e-38
WBGene00044445	C02F5.14	C02F5.14	25.8047	3.66293	1.873	0.339333	5.51965	3.4e-08	4.97e-07
WBGene00009416	F35E2.9	F35E2.9	13.5088	3.66229	1.87275	0.521748	3.58937	0.000331475	0.0018622
WBGene00045355	D1086.17	D1086.17	26.4296	3.65254	1.8689	0.363015	5.14828	2.63e-07	3.25e-06
WBGene00000878	cyn-2	ZK520.5	64.3507	3.64989	1.86785	0.238986	7.81575	5.46e-15	2.16e-13
WBGene00000023	abt-5	Y53C10A.9	12.0014	3.63983	1.86387	0.531578	3.50629	0.000454394	0.00245198
WBGene00018384	F43C11.7	F43C11.7	153.036	3.63473	1.86185	0.258132	7.21277	5.48e-13	1.66e-11
WBGene00009388	F35B12.9	F35B12.9	29.1805	3.62068	1.85626	0.320984	5.78303	7.34e-09	1.21e-07
WBGene00010368	H06A10.1	H06A10.1	19.1129	3.61535	1.85414	0.409596	4.52674	5.99e-06	5.53e-05
WBGene00011968	T23G11.1	T23G11.1	40.1063	3.61165	1.85266	0.286822	6.45926	1.05e-10	2.32e-09
WBGene00020774	T24E12.5	T24E12.5	8.59073	3.60713	1.85085	0.608059	3.04387	0.0023356	0.00976319
WBGene00010719	K09E4.1	K09E4.1	26.0834	3.60058	1.84823	0.3968	4.65783	3.2e-06	3.15e-05
WBGene00018590	nlp-37	F48B9.4	5.48575	3.59892	1.84756	0.755146	2.44663	0.0144199	0.0438669
WBGene00021880	Y54G2A.15	Y54G2A.15	10.3103	3.58774	1.84307	0.555951	3.31517	0.000915865	0.00442823
WBGene00011429	T04C12.7	T04C12.7	6.58574	3.58598	1.84237	0.711786	2.58837	0.00964311	0.0316788
WBGene00017418	F13B6.3	F13B6.3	42.4458	3.58473	1.84187	0.277004	6.64925	2.95e-11	7.01e-10
WBGene00001450	flp-7	F49E10.3	17.296	3.58268	1.84104	0.410844	4.48111	7.43e-06	6.71e-05
WBGene00017713	F22E5.20	F22E5.20	6.94888	3.5623	1.83281	0.764779	2.39652	0.0165516	0.0490535
WBGene00014116	ZK858.2	ZK858.2	28.1417	3.55904	1.83149	0.349305	5.24323	1.58e-07	2.03e-06
WBGene00012638	Y38H8A.4	Y38H8A.4	8.1009	3.5535	1.82924	0.637288	2.87035	0.00410016	0.0156483
WBGene00020363	fbxa-3	T08E11.7	8.3639	3.54809	1.82704	0.628122	2.90874	0.00362894	0.0140869
WBGene00007082	acs-10	AH10.1	16.1599	3.54362	1.82522	0.453657	4.02336	5.74e-05	0.000399905
WBGene00016491	acdh-5	C37A2.3	9.27523	3.53728	1.82264	0.577871	3.15406	0.00161017	0.00713364
WBGene00018261	cyp-33C5	F41B5.3	6.53024	3.53121	1.82016	0.701088	2.5962	0.00942622	0.0310546
WBGene00007977	gska-3	C36B1.10	13.1444	3.50773	1.81054	0.470233	3.8503	0.000117972	0.000752778
WBGene00017698	F22B7.9	F22B7.9	32.7055	3.4858	1.80149	0.342378	5.2617	1.43e-07	1.86e-06
WBGene00018135	F37A4.5	F37A4.5	10.4832	3.47659	1.79767	0.574338	3.12999	0.00174814	0.00764227
WBGene00017755	zip-8	F23F12.9	64.5446	3.47131	1.79548	0.422105	4.25364	2.1e-05	0.000167534
WBGene00000546	clp-6	Y77E11A.10	23.8703	3.46869	1.79439	0.371831	4.82582	1.39e-06	1.49e-05
WBGene00021581	clec-70	Y46C8AL.3	11.0899	3.45453	1.78849	0.571106	3.13162	0.00173845	0.00760902
WBGene00194717	ZC239.22	ZC239.22	10.8842	3.45434	1.78841	0.531118	3.36725	0.000759213	0.00378833
WBGene00000986	dhs-23	R08H2.1	28.792	3.45421	1.78836	0.348301	5.13451	2.83e-07	3.47e-06
WBGene00000657	col-81	F38A3.1	892.186	3.45129	1.78714	0.229077	7.80147	6.12e-15	2.41e-13
WBGene00010082	F55A11.11	F55A11.11	17.6163	3.45065	1.78687	0.442759	4.03576	5.44e-05	0.000380587
WBGene00004300	ram-2	F38A3.2	60.8189	3.43648	1.78093	0.235421	7.56487	3.88e-14	1.39e-12
WBGene00077443	Y71A12B.19	Y71A12B.19	6.37069	3.43223	1.77915	0.665922	2.6717	0.00754671	0.0257392
WBGene00022349	Y82E9BR.17	Y82E9BR.17	65.8295	3.41352	1.77126	0.317148	5.58497	2.34e-08	3.53e-07
WBGene00017613	F20A1.1	F20A1.1	46.8518	3.40499	1.76765	0.256329	6.89602	5.35e-12	1.45e-10
WBGene00012741	Y40H4A.2	Y40H4A.2	6.4128	3.40339	1.76697	0.677924	2.60645	0.00914862	0.0302574
WBGene00004264	qua-1	T05C12.10	6.83611	3.3981	1.76473	0.718454	2.45629	0.0140381	0.042955
WBGene00018926	F56A11.6	F56A11.6	12.9516	3.39047	1.76149	0.502273	3.50703	0.00045314	0.00244675
WBGene00019026	F58A6.9	F58A6.9	11.7783	3.38767	1.76029	0.54141	3.25132	0.00114872	0.00535999
WBGene00009308	F32A11.3	F32A11.3	37.712	3.37313	1.75409	0.319597	5.48843	4.06e-08	5.85e-07
WBGene00000712	col-139	F41F3.4	1319.82	3.36991	1.75271	0.194796	8.99767	2.31e-19	1.39e-17
WBGene00000719	col-146	T06E4.6	6.2374	3.36771	1.75177	0.729084	2.4027	0.0162747	0.0484198
WBGene00011486	T05E12.3	T05E12.3	72.2658	3.36635	1.75119	0.207395	8.44373	3.07e-17	1.58e-15
WBGene00021772	math-45	Y51H7BM.1	21.9248	3.36623	1.75113	0.435781	4.01838	5.86e-05	0.000407039
WBGene00003471	mtd-1	ZK337.5	8.02132	3.36618	1.75111	0.598127	2.92766	0.00341524	0.0133597
WBGene00010175	F56H11.2	F56H11.2	8.00199	3.34779	1.74321	0.647555	2.69199	0.00710273	0.0244781
WBGene00000256	bli-6	Y73B6BL.34	35.0144	3.32772	1.73453	0.303388	5.71721	1.08e-08	1.75e-07
WBGene00001188	egl-20	W08D2.1	30.9776	3.31008	1.72687	0.309931	5.57178	2.52e-08	3.77e-07
WBGene00003689	nhr-99	M02H5.1	32.1864	3.30789	1.72591	0.319514	5.40168	6.6e-08	9.16e-07
WBGene00017058	msrp-6	D2062.6	8.46402	3.29691	1.72112	0.647297	2.65892	0.00783904	0.0265928
WBGene00010747	K10D11.3	K10D11.3	13.5614	3.28102	1.71414	0.494193	3.46857	0.000523245	0.00276453
WBGene00011894	ttr-23	T21C9.8	10.0447	3.28009	1.71373	0.576089	2.97477	0.00293205	0.0117639
WBGene00003569	ncx-4	F35C12.2	37.9378	3.2753	1.71163	0.304626	5.61878	1.92e-08	2.94e-07
WBGene00013710	Y106G6G.1	Y106G6G.1	12.5496	3.27458	1.71131	0.515767	3.31799	0.00090668	0.0043885
WBGene00002048	ida-1	B0244.2	161.565	3.27452	1.71128	0.141136	12.125	7.78e-34	1.41e-31
WBGene00008358	nspc-18	D1025.7	8.71632	3.27266	1.71046	0.618013	2.76768	0.0056457	0.0203053
WBGene00001158	ech-9	F01G10.3	27.0691	3.26509	1.70712	0.337844	5.05299	4.35e-07	5.1e-06
WBGene00000602	col-13	F15H10.2	6.7019	3.26311	1.70625	0.701171	2.43343	0.0149567	0.0452189
WBGene00000722	col-149	B0024.1	62.7644	3.24853	1.69979	0.255765	6.64588	3.01e-11	7.16e-10
WBGene00012219	W03C9.1	W03C9.1	8.87266	3.24035	1.69615	0.637486	2.66069	0.00779818	0.0264779
WBGene00000684	col-110	F19C7.7	11.419	3.23359	1.69314	0.497801	3.40123	0.00067084	0.00341473
WBGene00011495	T05F1.11	T05F1.11	27.3959	3.22985	1.69147	0.342129	4.94395	7.66e-07	8.59e-06
WBGene00016866	coel-1	C52B9.3	82.2419	3.21629	1.6854	0.206007	8.18124	2.81e-16	1.3e-14
WBGene00010707	cyp-14A3	K09A11.4	14.8276	3.20906	1.68215	0.445456	3.77625	0.000159208	0.000976092
WBGene00009115	F25F2.1	F25F2.1	14.2504	3.20897	1.68211	0.471195	3.56988	0.000357143	0.00198078
WBGene00017226	fbxa-53	F07G6.7	13.9322	3.1991	1.67766	0.469222	3.57542	0.000349672	0.00194713
WBGene00001483	fog-3	C03C11.2	9.11052	3.18721	1.67229	0.565533	2.95702	0.00310626	0.012355
WBGene00018489	F46E10.2	F46E10.2	22.6411	3.1845	1.67107	0.445104	3.75433	0.000173808	0.00105579
WBGene00019165	mpz-4	H06H21.9	7.76361	3.17374	1.66618	0.606543	2.74701	0.00601406	0.0213768
WBGene00020155	T02B11.3	T02B11.3	105.019	3.16433	1.6619	0.307174	5.4103	6.29e-08	8.75e-07
WBGene00019512	K08A2.2	K08A2.2	7.71348	3.16432	1.6619	0.629759	2.63894	0.00831657	0.0279441
WBGene00008215	C49F8.3	C49F8.3	8.24257	3.15712	1.65861	0.603566	2.74802	0.0059957	0.0213265
WBGene00000707	col-133	F52B11.4	40.88	3.14841	1.65463	0.55025	3.00704	0.00263802	0.0108071
WBGene00012937	Y47D3A.31	Y47D3A.31	13.2053	3.14539	1.65324	0.489238	3.37921	0.000726952	0.00365136
WBGene00014091	ZK822.4	ZK822.4	92.3075	3.13818	1.64993	0.207529	7.95034	1.86e-15	7.63e-14
WBGene00006870	vab-3	F14F3.1	11.2154	3.10996	1.6369	0.579347	2.82541	0.00472196	0.0175572
WBGene00016362	C33G8.4	C33G8.4	17.2411	3.10487	1.63453	0.413494	3.95297	7.72e-05	0.000519386
WBGene00000703	col-129	M18.1	1970.01	3.09623	1.63051	0.205599	7.93053	2.18e-15	8.92e-14
WBGene00001451	flp-8	F31F6.4	7.10554	3.09496	1.62992	0.651722	2.50094	0.0123863	0.0387844
WBGene00000951	deg-3	K03B8.9	6.83139	3.0944	1.62966	0.653501	2.49373	0.0126407	0.039459
WBGene00011522	srap-1	T06D8.1	181.078	3.09306	1.62904	0.13578	11.9976	3.66e-33	6.31e-31
WBGene00022705	ZK354.2	ZK354.2	22.1989	3.09053	1.62785	0.371463	4.38227	1.17e-05	0.000100121
WBGene00003748	nlp-10	F37A8.4	32.3684	3.09005	1.62763	0.294754	5.522	3.35e-08	4.91e-07
WBGene00017193	F07C3.2	F07C3.2	7.27875	3.08292	1.6243	0.636433	2.55219	0.0107048	0.0343996
WBGene00003742	nlp-4	F59C6.6	8.09157	3.07048	1.61846	0.603909	2.67998	0.00736267	0.0251965
WBGene00012784	Y43C5A.4	Y43C5A.4	6.94357	3.05592	1.61161	0.673085	2.39436	0.0166495	0.0492858
WBGene00021520	Y41D4B.18	Y41D4B.18	8.11271	3.05198	1.60975	0.630438	2.55338	0.0106684	0.0342971
WBGene00015740	C13E3.1	C13E3.1	43.6866	3.03984	1.60399	0.261792	6.12699	8.96e-10	1.71e-08
WBGene00010513	K02E11.4	K02E11.4	8.7651	3.02724	1.598	0.564247	2.8321	0.0046244	0.017264
WBGene00019111	F59E11.5	F59E11.5	31.8117	3.02513	1.597	0.353283	4.52044	6.17e-06	5.68e-05
WBGene00009843	F48C5.2	F48C5.2	7.33132	3.0161	1.59268	0.657396	2.42271	0.0154051	0.0462955
WBGene00009995	F53F4.13	F53F4.13	94.4963	3.0156	1.59244	0.177483	8.9724	2.9e-19	1.75e-17
WBGene00011799	T16G1.5	T16G1.5	11.9916	3.01396	1.59166	0.516231	3.08323	0.00204768	0.00874267
WBGene00016309	sdz-4	C32B5.16	19.0199	3.01347	1.59143	0.532153	2.99054	0.00278483	0.0112915
WBGene00017597	F19C7.8	F19C7.8	7.92056	3.01227	1.59085	0.61887	2.57057	0.010153	0.0329957
WBGene00012819	Y43F8B.9	Y43F8B.9	28.6025	3.01051	1.59001	0.324004	4.90737	9.23e-07	1.02e-05
WBGene00018773	F53G12.8	F53G12.8	14.2514	3.00668	1.58817	0.496694	3.19749	0.00138629	0.00628304
WBGene00008598	spin-3	F09A5.1	36.613	3.0029	1.58636	0.284827	5.56954	2.55e-08	3.81e-07
WBGene00001392	far-8	K02F3.3	113.465	3.00288	1.58635	0.166459	9.52997	1.57e-21	1.19e-19
WBGene00044807	T19H5.6	T19H5.6	12.5095	2.99739	1.58371	0.557042	2.84306	0.00446822	0.0167699
WBGene00014121	ZK858.8	ZK858.8	16.4472	2.99355	1.58186	0.424976	3.72222	0.000197475	0.00118391
WBGene00001781	gst-33	C02A12.1	8.78709	2.98175	1.57616	0.588674	2.67747	0.00741804	0.0253688
WBGene00021018	W04B5.1	W04B5.1	25.6935	2.98137	1.57598	0.341856	4.61007	4.03e-06	3.9e-05
WBGene00015574	irg-1	C07G3.2	9.0195	2.97669	1.57371	0.5963	2.63913	0.00831203	0.0279441
WBGene00020841	T27A3.5	T27A3.5	7.63398	2.97481	1.5728	0.62685	2.50904	0.0121058	0.0380318
WBGene00020567	adt-3	T19D2.1	21.2046	2.97406	1.57243	0.369293	4.25796	2.06e-05	0.000164587
WBGene00015947	C18A11.1	C18A11.1	31.1622	2.96704	1.56903	0.336037	4.66921	3.02e-06	3e-05
WBGene00017382	F11D5.5	F11D5.5	9.61499	2.96294	1.56703	0.564621	2.77536	0.00551399	0.019926
WBGene00018729	F53A9.6	F53A9.6	34.3123	2.96058	1.56588	0.320149	4.89109	1e-06	1.1e-05
WBGene00021075	W07E6.3	W07E6.3	10.5188	2.94883	1.56014	0.561153	2.78024	0.00543184	0.0196854
WBGene00016658	C45B2.1	C45B2.1	339.726	2.94722	1.55936	0.109928	14.1853	1.13e-45	5.36e-43
WBGene00044347	Y71G12B.30	Y71G12B.30	12.9569	2.94674	1.55912	0.486759	3.20307	0.00135972	0.00618292
WBGene00011445	T04F8.7	T04F8.7	55.629	2.93599	1.55385	0.251442	6.17974	6.42e-10	1.25e-08
WBGene00011733	T12D8.5	T12D8.5	190.002	2.93356	1.55265	0.241722	6.42328	1.33e-10	2.89e-09
WBGene00022555	btb-12	ZC204.3	14.2842	2.93322	1.55248	0.481897	3.2216	0.00127475	0.00584912
WBGene00016181	C28C12.11	C28C12.11	10.4109	2.92609	1.54897	0.640945	2.4167	0.0156619	0.0469577
WBGene00019495	sdz-24	K07E8.3	64.5334	2.92087	1.5464	0.224768	6.87999	5.99e-12	1.6e-10
WBGene00044514	R09E12.9	R09E12.9	100.382	2.90896	1.5405	0.299324	5.1466	2.65e-07	3.27e-06
WBGene00044615	B0252.8	B0252.8	8.06606	2.89483	1.53348	0.609388	2.51642	0.0118553	0.0373673
WBGene00003751	nlp-13	E03D2.1	25.1564	2.88703	1.52958	0.358465	4.26704	1.98e-05	0.000158868
WBGene00014159	arrd-4	ZK938.2	16.6689	2.88623	1.52918	0.515568	2.96602	0.00301685	0.0120499
WBGene00044719	clec-172	K03H6.7	17.2066	2.87554	1.52383	0.435396	3.49987	0.000465479	0.0025029
WBGene00011019	R05A10.2	R05A10.2	12.7948	2.86184	1.51694	0.47401	3.20024	0.00137316	0.00623467
WBGene00021463	zeel-1	Y39G10AR.5	20.7036	2.85954	1.51578	0.477757	3.1727	0.00151028	0.00676016
WBGene00000723	col-150	B0024.2	8.56135	2.85378	1.51288	0.588469	2.57087	0.0101444	0.0329759
WBGene00006983	zig-6	T03G11.8	9.66563	2.8413	1.50655	0.545686	2.76084	0.00576534	0.0206768
WBGene00017653	F21C10.3	F21C10.3	10.9794	2.83887	1.50532	0.507425	2.96658	0.00301133	0.012031
WBGene00001623	glt-5	Y53C12A.2	33.5107	2.83598	1.50385	0.317347	4.73881	2.15e-06	2.2e-05
WBGene00014002	ZK593.2	ZK593.2	10.7412	2.83532	1.50351	0.526208	2.85726	0.00427314	0.0161617
WBGene00019200	H14E04.3	H14E04.3	20.7111	2.83383	1.50275	0.392222	3.83139	0.00012742	0.000807296
WBGene00019586	K09F6.3	K09F6.3	26.6107	2.8285	1.50004	0.347531	4.31626	1.59e-05	0.000131014
WBGene00009991	F53F4.8	F53F4.8	10.4555	2.82827	1.49992	0.530315	2.82836	0.00467877	0.0174265
WBGene00010246	F58D5.7	F58D5.7	13.8317	2.82394	1.49771	0.501892	2.98413	0.00284388	0.0114738
WBGene00019488	K07D4.9	K07D4.9	8.46648	2.81848	1.49492	0.619922	2.41146	0.0158889	0.0475163
WBGene00006464	bath-47	T07H3.1	9.57078	2.81678	1.49405	0.571758	2.61308	0.00897308	0.0297785
WBGene00022314	Y77E11A.14	Y77E11A.14	8.7734	2.81455	1.4929	0.575501	2.59409	0.00948409	0.0312105
WBGene00002090	ins-7	ZK1251.2	12.5721	2.81086	1.49101	0.492308	3.02862	0.00245676	0.0101605
WBGene00010585	K05C4.9	K05C4.9	22.4908	2.81083	1.491	0.44916	3.31952	0.000901711	0.00436585
WBGene00012605	Y38F1A.1	Y38F1A.1	18.8522	2.7791	1.47462	0.403308	3.6563	0.00025588	0.00148422
WBGene00017312	pitr-5	F09G2.3	12.8268	2.77184	1.47084	0.477092	3.08293	0.00204973	0.00874896
WBGene00020450	fbxa-10	T12B5.3	12.9117	2.77026	1.47002	0.50159	2.93072	0.00338175	0.0132577
WBGene00000726	col-153	F17C11.3	61.4597	2.764	1.46676	0.220065	6.66511	2.64e-11	6.38e-10
WBGene00044316	F41G3.21	F41G3.21	10.5543	2.7619	1.46566	0.538576	2.72136	0.00650133	0.0227569
WBGene00003526	nas-7	C07D10.4	25.6939	2.75637	1.46277	0.349853	4.1811	2.9e-05	0.000223229
WBGene00018380	decr-1.1	F43C11.3	10.9418	2.75365	1.46135	0.529478	2.75998	0.00578057	0.0207215
WBGene00011517	cgt-1	T06C12.10	11.7584	2.75269	1.46084	0.534913	2.73099	0.00631446	0.0222258
WBGene00009577	F40F8.4	F40F8.4	21.5474	2.74786	1.45831	0.350932	4.15553	3.25e-05	0.000246002
WBGene00009377	F34D10.8	F34D10.8	16.7092	2.74772	1.45824	0.433599	3.3631	0.000770725	0.00383819
WBGene00016088	clec-266	C25B8.4	153.234	2.74732	1.45803	0.335988	4.33951	1.43e-05	0.000119187
WBGene00017364	clec-7	F10G2.3	92.7941	2.74681	1.45776	0.187383	7.77955	7.28e-15	2.84e-13
WBGene00013556	Y75B8A.23	Y75B8A.23	8.93391	2.74652	1.4576	0.597051	2.44134	0.014633	0.0444082
WBGene00010684	K08F9.1	K08F9.1	15.0234	2.73377	1.45089	0.454053	3.19543	0.00139622	0.00632237
WBGene00003746	nlp-8	D2005.2	13.9103	2.72541	1.44647	0.462398	3.1282	0.00175883	0.00767791
WBGene00000529	clh-2	B0491.8	8.97342	2.72222	1.44479	0.594885	2.42868	0.0151539	0.0457058
WBGene00003387	mod-5	Y54E10BR.7	13.8306	2.72037	1.4438	0.48294	2.98961	0.00279334	0.0113151
WBGene00007365	C06B3.6	C06B3.6	173.346	2.72033	1.44378	0.148721	9.70799	2.79e-22	2.3e-20
WBGene00045400	C54D10.13	C54D10.13	11.2453	2.71618	1.44158	0.532491	2.70724	0.00678461	0.0235475
WBGene00005649	srp-8	F20D6.3	15.7898	2.71345	1.44013	0.44318	3.24953	0.00115595	0.00538384
WBGene00018033	F35B3.7	F35B3.7	9.37901	2.71259	1.43967	0.579155	2.48581	0.0129257	0.0401915
WBGene00008356	nspc-20	D1025.4	10.6322	2.70812	1.43729	0.556787	2.5814	0.00983998	0.0321793
WBGene00019699	math-34	M01D1.2	10.9953	2.70741	1.43691	0.524222	2.74104	0.00612449	0.0216526
WBGene00020537	fbxb-37	T16A1.8	16.6591	2.69935	1.43261	0.555356	2.57963	0.00989061	0.032317
WBGene00011213	R10E8.8	R10E8.8	42.8334	2.69299	1.42921	0.271542	5.2633	1.41e-07	1.84e-06
WBGene00011072	tag-209	R06F6.11	23.4162	2.68085	1.42269	0.363352	3.91547	9.02e-05	0.000596314
WBGene00009929	abts-2	F52D10.1	10.5348	2.67741	1.42084	0.520464	2.72995	0.0063344	0.0222857
WBGene00017013	ensh-1	D1009.3	9.53818	2.67562	1.41987	0.569991	2.49104	0.0127369	0.039702
WBGene00003171	mec-7	ZK154.3	66.9166	2.67247	1.41817	0.212844	6.66297	2.68e-11	6.46e-10
WBGene00018437	btb-8	F45C12.6	26.4581	2.66934	1.41648	0.452213	3.13233	0.00173423	0.00759457
WBGene00017434	F13H8.1	F13H8.1	16.3266	2.66395	1.41357	0.419371	3.37069	0.000749811	0.00375128
WBGene00015710	C12D5.9	C12D5.9	9.25497	2.65676	1.40967	0.528425	2.66768	0.00763767	0.0260085
WBGene00016883	C52E2.4	C52E2.4	29.2871	2.65436	1.40836	0.314637	4.47615	7.6e-06	6.84e-05
WBGene00018931	ugt-52	F56B3.7	16.7497	2.64901	1.40546	0.427479	3.28777	0.00100983	0.00481707
WBGene00018286	F41E6.5	F41E6.5	73.3811	2.63827	1.39959	0.209688	6.67466	2.48e-11	6.02e-10
WBGene00009560	psa-3	F39D8.2	15.258	2.63783	1.39935	0.509878	2.74449	0.00606053	0.0215117
WBGene00022597	ZC395.5	ZC395.5	27.1653	2.63774	1.3993	0.356379	3.92644	8.62e-05	0.000573264
WBGene00022849	acs-6	ZK1127.2	20.5776	2.62908	1.39456	0.388193	3.59243	0.000327604	0.00184387
WBGene00001898	his-24	M163.3	385.164	2.62242	1.3909	0.277353	5.01491	5.31e-07	6.11e-06
WBGene00010706	cyp-14A2	K09A11.3	119.724	2.61022	1.38417	0.320865	4.31387	1.6e-05	0.000132009
WBGene00006747	unc-7	R07D5.1	11.4228	2.60636	1.38204	0.512509	2.69661	0.00700494	0.024163
WBGene00013146	Y53C12B.7	Y53C12B.7	10.5666	2.60331	1.38035	0.538785	2.56197	0.0104081	0.0335956
WBGene00011289	R102.2	R102.2	13.9694	2.59707	1.37688	0.441314	3.11997	0.00180871	0.0078595
WBGene00000781	cpr-1	C52E4.1	6541.39	2.59441	1.37541	0.115883	11.869	1.72e-32	2.83e-30
WBGene00009500	F36H2.3	F36H2.3	24.3724	2.59385	1.3751	0.338844	4.0582	4.95e-05	0.000349828
WBGene00018724	F53A9.1	F53A9.1	30.9534	2.59275	1.37448	0.301999	4.55129	5.33e-06	4.99e-05
WBGene00008028	scl-6	C39E9.4	18.0528	2.59117	1.3736	0.416615	3.29706	0.000977039	0.00468423
WBGene00008914	F17C11.2	F17C11.2	21.2235	2.58418	1.36971	0.406873	3.36642	0.000761497	0.00379722
WBGene00021358	Y37E11AL.2	Y37E11AL.2	12.2488	2.58225	1.36863	0.499746	2.73864	0.0061693	0.0217806
WBGene00021198	npp-26	Y17G9B.1	10.7755	2.5809	1.36788	0.551972	2.47816	0.0132062	0.0409545
WBGene00011212	R10E8.6	R10E8.6	82.2834	2.57347	1.36371	0.194435	7.01372	2.32e-12	6.58e-11
WBGene00007409	C07B5.4	C07B5.4	26.6728	2.56992	1.36172	0.342746	3.97299	7.1e-05	0.000482531
WBGene00019717	trx-3	M01H9.1	16.766	2.56444	1.35864	0.438854	3.09589	0.00196222	0.0084449
WBGene00021641	Y47G6A.15	Y47G6A.15	17.4234	2.55934	1.35577	0.416495	3.25519	0.00113318	0.00530999
WBGene00020237	phat-4	T05B4.3	35.5634	2.55479	1.3532	0.301703	4.48521	7.28e-06	6.6e-05
WBGene00012786	Y43C5B.3	Y43C5B.3	33.3555	2.55221	1.35175	0.289481	4.66956	3.02e-06	3e-05
WBGene00009840	fbxa-189	F47H4.9	49.3693	2.5447	1.3475	0.267446	5.03838	4.69e-07	5.47e-06
WBGene00000667	col-92	W05B2.6	83.7154	2.54408	1.34714	0.195399	6.89432	5.41e-12	1.46e-10
WBGene00003618	nhr-19	E02H1.7	68.4284	2.53587	1.34248	0.205038	6.54745	5.85e-11	1.32e-09
WBGene00017340	F10D7.3	F10D7.3	32.24	2.53473	1.34183	0.328422	4.08569	4.39e-05	0.000318757
WBGene00044554	F41E6.15	F41E6.15	22.6826	2.52404	1.33573	0.350345	3.81262	0.000137504	0.000861826
WBGene00012910	Y46G5A.20	Y46G5A.20	10.7942	2.52272	1.33498	0.541892	2.46356	0.0137565	0.0422554
WBGene00009846	F48F5.2	F48F5.2	9.73676	2.52208	1.33462	0.558097	2.39137	0.0167858	0.0495926
WBGene00000715	col-142	T15B7.4	951.523	2.52023	1.33355	0.138386	9.63649	5.61e-22	4.39e-20
WBGene00022650	ZK84.2	ZK84.2	12.7376	2.51249	1.32912	0.491216	2.70577	0.00681453	0.0236333
WBGene00044401	Y55B1BR.6	Y55B1BR.6	9.40683	2.51119	1.32837	0.552881	2.40264	0.0162772	0.0484198
WBGene00016407	C34D10.2	C34D10.2	372.546	2.50551	1.3251	0.100935	13.1283	2.27e-39	6.37e-37
WBGene00013898	ZC443.3	ZC443.3	74.2227	2.50172	1.32292	0.196787	6.72259	1.79e-11	4.49e-10
WBGene00003173	mec-9	C50H2.3	10.8089	2.49694	1.32016	0.539494	2.44704	0.0144036	0.0438259
WBGene00012144	T28H10.3	T28H10.3	593.065	2.49122	1.31685	0.148627	8.86014	7.99e-19	4.59e-17
WBGene00016422	noah-1	C34G6.6	126.634	2.48632	1.31401	0.192102	6.84016	7.91e-12	2.08e-10
WBGene00000425	ced-11	ZK512.3	46.8859	2.48469	1.31306	0.272262	4.82279	1.42e-06	1.5e-05
WBGene00017483	lgc-22	F15E6.2	70.2891	2.48103	1.31094	0.209936	6.24445	4.25e-10	8.57e-09
WBGene00010413	H25K10.4	H25K10.4	11.9491	2.47761	1.30895	0.483915	2.70491	0.00683225	0.0236708
WBGene00000714	col-141	T15B7.5	24.3757	2.47751	1.30889	0.339413	3.85635	0.000115095	0.000737521
WBGene00008519	cyp-13B1	F02C12.5	17.7892	2.47249	1.30597	0.425852	3.06672	0.00216422	0.00916037
WBGene00006306	sue-1	F07A5.5	10.3028	2.47245	1.30594	0.529252	2.46753	0.0136051	0.0418664
WBGene00012013	ugt-54	T25B9.7	33.6701	2.47214	1.30576	0.286946	4.55053	5.35e-06	5e-05
WBGene00007642	C17E4.2	C17E4.2	22.4158	2.46359	1.30076	0.434966	2.99049	0.0027853	0.0112915
WBGene00001461	flp-18	Y48D7A.2	15.5243	2.46125	1.29939	0.433951	2.99433	0.00275048	0.0111832
WBGene00008233	C50F4.8	C50F4.8	54.3808	2.45638	1.29653	0.233497	5.55267	2.81e-08	4.17e-07
WBGene00007404	best-5	C07A9.8	16.5682	2.4563	1.29649	0.427852	3.03022	0.00244376	0.0101178
WBGene00012444	Y15E3A.5	Y15E3A.5	29.2621	2.45105	1.2934	0.344911	3.74996	0.000176865	0.00107136
WBGene00008038	C40H1.2	C40H1.2	28.6395	2.4435	1.28895	0.337389	3.82037	0.000133251	0.000838634
WBGene00009803	F47B8.2	F47B8.2	35.8982	2.44111	1.28754	0.301246	4.27404	1.92e-05	0.000154756
WBGene00009238	selt-1.2	F28H7.4	12.4751	2.43793	1.28566	0.484747	2.65222	0.00799649	0.0270604
WBGene00009842	igeg-2	F48C5.1	11.0586	2.4373	1.28528	0.536231	2.39688	0.0165353	0.0490244
WBGene00016461	C35E7.9	C35E7.9	11.5392	2.43402	1.28334	0.53359	2.40511	0.0161677	0.0482172
WBGene00002188	kgb-2	ZC416.4	13.6921	2.42796	1.27975	0.459084	2.78761	0.00530991	0.0193405
WBGene00019580	oac-58	K09E10.2	10.8256	2.42705	1.2792	0.511506	2.50086	0.0123892	0.0387857
WBGene00006310	sul-3	C54D2.4	35.82	2.42662	1.27895	0.29007	4.4091	1.04e-05	9.01e-05
WBGene00003752	nlp-14	D1009.4	11.3697	2.42167	1.276	0.50672	2.51816	0.011797	0.0372561
WBGene00194769	Y32B12C.5	Y32B12C.5	68.2281	2.42083	1.2755	0.218012	5.85061	4.9e-09	8.45e-08
WBGene00011397	T03E6.8	T03E6.8	90.0465	2.41946	1.27469	0.195962	6.50475	7.78e-11	1.73e-09
WBGene00020054	R13D7.2	R13D7.2	10.5426	2.4192	1.27453	0.514577	2.47685	0.0132547	0.0410715
WBGene00017246	F08D12.2	F08D12.2	42.2045	2.41678	1.27309	0.266052	4.78509	1.71e-06	1.79e-05
WBGene00007919	cup-16	C34C6.7	46.9063	2.41599	1.27262	0.285296	4.46068	8.17e-06	7.33e-05
WBGene00019343	nep-18	K02F6.9	25.9445	2.4128	1.27071	0.337294	3.76736	0.000164984	0.00100865
WBGene00012491	Y20C6A.1	Y20C6A.1	43.5636	2.41141	1.26988	0.276576	4.59143	4.4e-06	4.21e-05
WBGene00004002	pgp-8	T21E8.3	12.1881	2.40224	1.26438	0.469633	2.69227	0.00709669	0.0244628
WBGene00017621	F20A1.10	F20A1.10	32.3939	2.39529	1.2602	0.295109	4.27029	1.95e-05	0.00015698
WBGene00007248	catp-4	C01G12.8	53.7216	2.39213	1.25829	0.247634	5.08127	3.75e-07	4.46e-06
WBGene00016119	C25H3.10	C25H3.10	40.0209	2.39162	1.25799	0.277638	4.53104	5.87e-06	5.44e-05
WBGene00004993	spp-8	C28C12.5	1103.88	2.38737	1.25542	0.0646539	19.4176	5.48e-84	1.19e-80
WBGene00000616	col-39	C09G5.4	57.7282	2.38669	1.25501	0.273211	4.59355	4.36e-06	4.17e-05
WBGene00011203	R10E4.7	R10E4.7	40.5092	2.38644	1.25486	0.303507	4.13453	3.56e-05	0.000264943
WBGene00010745	dod-17	K10D11.1	14.1014	2.38619	1.25471	0.440611	2.84766	0.00440426	0.0165544
WBGene00022445	Y110A2AL.9	Y110A2AL.9	12.6726	2.38572	1.25442	0.500721	2.50523	0.0122371	0.0383489
WBGene00009096	fipr-1	F23H12.8	22.3464	2.38157	1.25191	0.367297	3.40845	0.00065332	0.00334576
WBGene00235352	ZK250.13	ZK250.13	43.9866	2.37697	1.24912	0.255808	4.88305	1.04e-06	1.14e-05
WBGene00013165	Y53F4B.19	Y53F4B.19	17.1912	2.37134	1.2457	0.439887	2.83187	0.00462768	0.0172659
WBGene00000699	col-125	C29F4.1	13.16	2.37028	1.24506	0.503	2.47526	0.0133139	0.0411961
WBGene00016898	C53C9.2	C53C9.2	81.5988	2.36867	1.24407	0.209088	5.95	2.68e-09	4.8e-08
WBGene00009110	F25D1.5	F25D1.5	56.6089	2.3606	1.23915	0.243116	5.09697	3.45e-07	4.14e-06
WBGene00007368	C06B8.2	C06B8.2	16.8961	2.35762	1.23733	0.400236	3.0915	0.0019915	0.00855335
WBGene00003179	mec-18	C52B9.9	11.7521	2.35406	1.23515	0.485097	2.5462	0.0108904	0.0348778
WBGene00016663	C45E1.4	C45E1.4	21.7977	2.35333	1.2347	0.37557	3.28754	0.00101065	0.00481799
WBGene00001820	ham-1	F53B2.6	34.8411	2.35171	1.23371	0.356544	3.4602	0.000539781	0.00283578
WBGene00019540	K08D12.6	K08D12.6	2080.69	2.35034	1.23287	0.171202	7.20125	5.97e-13	1.79e-11
WBGene00010133	F55H12.2	F55H12.2	40.8248	2.34968	1.23246	0.265396	4.64386	3.42e-06	3.36e-05
WBGene00219859	C49F5.11	C49F5.11	16.9104	2.34883	1.23194	0.42752	2.8816	0.00395659	0.0151609
WBGene00004192	prx-2	ZK809.7	15.6039	2.34272	1.22819	0.479111	2.56347	0.0103631	0.0334744
WBGene00016677	C45G9.6	C45G9.6	50.969	2.34269	1.22817	0.247992	4.95245	7.33e-07	8.27e-06
WBGene00003175	mec-12	C44B11.3	106.76	2.34133	1.22733	0.180467	6.80086	1.04e-11	2.69e-10
WBGene00013836	fbxa-29	ZC47.3	24.4161	2.34111	1.22719	0.349871	3.50755	0.000452246	0.002443
WBGene00017484	F15E6.3	F15E6.3	21.9018	2.34052	1.22683	0.376249	3.26068	0.00111144	0.00521973
WBGene00010944	M176.5	M176.5	20.0274	2.33401	1.22281	0.389114	3.14255	0.00167483	0.00735995
WBGene00009813	haly-1	F47B10.2	371.161	2.33279	1.22205	0.0927375	13.1776	1.18e-39	3.45e-37
WBGene00011383	T02E9.5	T02E9.5	29.9676	2.32684	1.21837	0.35766	3.40651	0.000657982	0.00336396
WBGene00017247	F08D12.3	F08D12.3	63.5755	2.32682	1.21836	0.224889	5.41761	6.04e-08	8.44e-07
WBGene00015476	C05D9.9	C05D9.9	50.1412	2.32601	1.21786	0.252858	4.81637	1.46e-06	1.55e-05
WBGene00011244	R11D1.3	R11D1.3	17.2565	2.3258	1.21773	0.410323	2.96773	0.00300008	0.0119956
WBGene00019014	F57C12.2	F57C12.2	19.2232	2.32456	1.21695	0.406129	2.99647	0.00273123	0.0111234
WBGene00020003	R11E3.1	R11E3.1	17.086	2.31841	1.21314	0.428384	2.83189	0.00462738	0.0172659
WBGene00219423	C23H5.15	C23H5.15	12.8228	2.31824	1.21303	0.468507	2.58914	0.00962148	0.0316215
WBGene00016523	C39B5.5	C39B5.5	52.1727	2.31819	1.213	0.244446	4.96225	6.97e-07	7.91e-06
WBGene00023408	cex-2	T09A5.1	24.1332	2.31753	1.21259	0.340274	3.56357	0.000365847	0.0020202
WBGene00017102	E02H9.4	E02H9.4	12.1558	2.31371	1.21021	0.481098	2.51551	0.0118859	0.0374339
WBGene00194985	Y25C1A.14	Y25C1A.14	14.2556	2.31317	1.20987	0.461044	2.62419	0.00868544	0.0290165
WBGene00008332	C55A6.3	C55A6.3	16.2167	2.30344	1.20379	0.452666	2.65934	0.00782948	0.0265722
WBGene00015759	C14C6.5	C14C6.5	343.273	2.30307	1.20356	0.0933091	12.8986	4.58e-38	1.14e-35
WBGene00017678	asp-12	F21F8.4	122.131	2.29274	1.19707	0.186544	6.4171	1.39e-10	2.98e-09
WBGene00009696	F44F1.4	F44F1.4	31.8874	2.27849	1.18808	0.355413	3.34281	0.000829353	0.00407532
WBGene00012538	Y37A1B.5	Y37A1B.5	198.236	2.27327	1.18477	0.126011	9.4021	5.35e-21	3.85e-19
WBGene00013899	ZC443.4	ZC443.4	22.7938	2.272	1.18396	0.369303	3.20593	0.00134625	0.00613185
WBGene00000213	asm-3	W03G1.7	369.431	2.27046	1.18299	0.0939711	12.5888	2.43e-36	5.06e-34
WBGene00019324	K02F2.5	K02F2.5	24.2349	2.26961	1.18244	0.360714	3.27807	0.00104521	0.0049578
WBGene00270321	Y41C4A.32	Y41C4A.32	21.8236	2.26864	1.18183	0.386172	3.06036	0.00221069	0.00931806
WBGene00001523	gbh-2	M05D6.7	111.653	2.2686	1.1818	0.173438	6.81396	9.49e-12	2.48e-10
WBGene00011026	R05D7.1	R05D7.1	14.6552	2.26571	1.17996	0.439668	2.68376	0.00727984	0.0249524
WBGene00011984	T24C2.5	T24C2.5	35.616	2.26313	1.17832	0.307638	3.83021	0.000128032	0.00081016
WBGene00016976	C56E10.3	C56E10.3	15.5416	2.26117	1.17707	0.452939	2.59873	0.00935694	0.0308724
WBGene00000503	cht-1	C04F6.3	288.507	2.26091	1.1769	0.30891	3.80984	0.000139054	0.000869749
WBGene00001786	gst-38	F35E8.8	14.615	2.2605	1.17664	0.481717	2.4426	0.0145819	0.0442619
WBGene00019703	fbxb-41	M01D1.8	19.0998	2.25748	1.17472	0.485026	2.42196	0.0154369	0.0463748
WBGene00021898	Y54G2A.36	Y54G2A.36	168.201	2.25546	1.17342	0.143069	8.20178	2.37e-16	1.11e-14
WBGene00006366	sym-1	C44H4.3	51.2011	2.25289	1.17178	0.293648	3.99042	6.6e-05	0.000450615
WBGene00001699	grd-10	F09D12.1	54.1741	2.2509	1.1705	0.230245	5.08372	3.7e-07	4.41e-06
WBGene00004972	spe-26	R10H10.2	16.9253	2.2504	1.17018	0.482248	2.42652	0.0152445	0.0458967
WBGene00019644	cpt-4	K11D12.4	93.7346	2.24955	1.16963	0.183881	6.36081	2.01e-10	4.2e-09
WBGene00020722	T23B12.8	T23B12.8	17.0771	2.24499	1.16671	0.434742	2.68368	0.00728175	0.0249533
WBGene00003165	mec-1	T07H8.4	23.5521	2.23929	1.16304	0.344987	3.37126	0.000748241	0.00374466
WBGene00006583	tnc-2	ZK673.7	33.1833	2.22936	1.15663	0.296735	3.89786	9.7e-05	0.000636379
WBGene00016781	C49G7.3	C49G7.3	155.275	2.22512	1.15389	0.155702	7.41086	1.25e-13	4.1e-12
WBGene00019105	asp-8	F59D6.3	44.4685	2.21713	1.14869	0.255556	4.49488	6.96e-06	6.35e-05
WBGene00011852	clec-26	T20B3.12	22.736	2.21545	1.1476	0.349064	3.28766	0.00101025	0.0048176
WBGene00007112	B0035.13	B0035.13	415.304	2.21352	1.14634	0.0905466	12.6603	9.82e-37	2.1e-34
WBGene00007414	C07E3.3	C07E3.3	31.1342	2.20975	1.14388	0.303655	3.76705	0.000165189	0.0010095
WBGene00007791	C28A5.6	C28A5.6	45.0691	2.20097	1.13814	0.263004	4.32746	1.51e-05	0.000125071
WBGene00010740	K10D3.6	K10D3.6	23.8578	2.19404	1.13359	0.349479	3.24365	0.00118008	0.00547602
WBGene00007958	C35C5.9	C35C5.9	24.5094	2.19375	1.1334	0.365405	3.10176	0.00192374	0.00830703
WBGene00022108	Y71F9AL.2	Y71F9AL.2	14.329	2.19274	1.13274	0.474142	2.38902	0.0168932	0.0498517
WBGene00003632	nhr-42	C33G8.6	62.45	2.19233	1.13246	0.216709	5.22574	1.73e-07	2.21e-06
WBGene00004773	sem-4	F15C11.1	50.9206	2.18816	1.12972	0.238093	4.74486	2.09e-06	2.15e-05
WBGene00017048	D2021.4	D2021.4	45.1693	2.18489	1.12756	0.246837	4.56804	4.92e-06	4.65e-05
WBGene00019659	K11H12.3	K11H12.3	22.6475	2.18243	1.12593	0.382589	2.94293	0.00325126	0.0128209
WBGene00020438	T12A2.3	T12A2.3	19.746	2.17983	1.12422	0.381677	2.94546	0.00322474	0.0127519
WBGene00002265	lec-2	F52H3.7	1948.76	2.1677	1.11617	0.158389	7.04698	1.83e-12	5.24e-11
WBGene00019300	swt-1	K02D7.5	25.8868	2.16243	1.11265	0.340563	3.26709	0.00108657	0.0051204
WBGene00021885	Y54G2A.20	Y54G2A.20	14.3802	2.16037	1.11128	0.445977	2.49178	0.0127103	0.0396356
WBGene00009043	F22B5.5	F22B5.5	14.7552	2.15336	1.10659	0.460198	2.4046	0.0161904	0.048253
WBGene00012525	Y32B12C.1	Y32B12C.1	27.4975	2.15075	1.10484	0.323551	3.41473	0.000638455	0.00327848
WBGene00013418	Y65A5A.1	Y65A5A.1	18.987	2.15036	1.10458	0.445917	2.47709	0.0132457	0.0410604
WBGene00019444	frpr-11	K06C4.8	34.7394	2.14815	1.1031	0.300786	3.66738	0.000245048	0.00143179
WBGene00000732	col-159	F57B1.3	542.435	2.14358	1.10002	0.161048	6.83042	8.47e-12	2.22e-10
WBGene00009785	F46C5.10	F46C5.10	27.6952	2.13811	1.09634	0.321938	3.40543	0.000660609	0.00337625
WBGene00009968	fig-1	F53B7.5	15.844	2.1285	1.08984	0.399784	2.72607	0.00640934	0.0224972
WBGene00019436	K06A9.2	K06A9.2	20.885	2.12796	1.08947	0.366049	2.9763	0.00291745	0.0117146
WBGene00022649	ZK84.1	ZK84.1	40.214	2.12776	1.08933	0.263843	4.12871	3.65e-05	0.000270819
WBGene00003178	mec-17	F57H12.7	67.244	2.12631	1.08835	0.211775	5.13918	2.76e-07	3.4e-06
WBGene00012152	cnc-10	VK10D6R.1	20.9335	2.12559	1.08786	0.39509	2.75345	0.00589705	0.0210397
WBGene00004878	smf-3	Y69A2AR.4	52.604	2.12357	1.08649	0.241231	4.50393	6.67e-06	6.1e-05
WBGene00021876	Y54G2A.11	Y54G2A.11	184.946	2.1226	1.08583	0.132024	8.22453	1.96e-16	9.26e-15
WBGene00007811	C29F7.2	C29F7.2	315.063	2.12196	1.0854	0.123546	8.78536	1.56e-18	8.76e-17
WBGene00010769	asah-1	K11D2.2	1245.05	2.11932	1.0836	0.0588433	18.415	9.95e-76	1.68e-72
WBGene00001707	grh-1	Y48G8AR.1	20.7573	2.1184	1.08298	0.389464	2.78069	0.00542433	0.0196676
WBGene00007479	C09F9.2	C09F9.2	29.2759	2.11803	1.08273	0.423079	2.55916	0.0104926	0.0338252
WBGene00022012	Y59H11AR.4	Y59H11AR.4	49.644	2.11571	1.08114	0.231	4.68026	2.87e-06	2.87e-05
WBGene00015047	faah-1	B0218.1	245.569	2.11425	1.08015	0.116025	9.30955	1.28e-20	9.02e-19
WBGene00008438	DH11.5	DH11.5	35.1628	2.11166	1.07838	0.315963	3.413	0.000642524	0.00329714
WBGene00020343	acs-3	T08B1.6	78.508	2.10985	1.07714	0.212711	5.06388	4.11e-07	4.85e-06
WBGene00016786	cyp-35A4	C49G7.8	23.0398	2.10824	1.07604	0.359591	2.9924	0.00276794	0.0112362
WBGene00004173	pqn-94	ZC15.8	24.9145	2.10661	1.07492	0.35925	2.99213	0.00277038	0.011243
WBGene00009595	F40F12.7	F40F12.7	155.543	2.10514	1.07391	0.143157	7.50166	6.3e-14	2.15e-12
WBGene00011869	dod-6	T20G5.7	84.8841	2.10063	1.07082	0.196075	5.46128	4.73e-08	6.73e-07
WBGene00003779	nob-1	Y75B8A.2	34.2548	2.09803	1.06903	0.284823	3.75334	0.000174497	0.0010587
WBGene00009089	jmjd-3.2	F23D12.5	27.033	2.09321	1.06572	0.403832	2.63901	0.00831497	0.0279441
WBGene00010475	K01F9.2	K01F9.2	38.2082	2.09132	1.06441	0.281998	3.77454	0.000160303	0.000982009
WBGene00003514	myo-2	T18D3.4	120.019	2.08987	1.06341	0.174864	6.08137	1.19e-09	2.24e-08
WBGene00004226	ptr-12	K07A3.2	30.1118	2.08899	1.0628	0.323724	3.28306	0.00102688	0.00488157
WBGene00011166	chil-22	R09D1.10	48.2649	2.08644	1.06104	0.25494	4.16193	3.16e-05	0.000240624
WBGene00044068	syd-9	ZK867.1	26.8376	2.08526	1.06023	0.364984	2.90485	0.00367424	0.0142299
WBGene00009638	nspc-14	F42F12.7	19.4964	2.08434	1.05959	0.394489	2.68597	0.00723192	0.0248274
WBGene00007867	C32H11.4	C32H11.4	33.9738	2.08077	1.05712	0.317529	3.32921	0.000870943	0.0042426
WBGene00012777	lact-8	Y42A5A.2	16.64	2.08044	1.05689	0.417287	2.53277	0.0113166	0.0360147
WBGene00012420	Y7A9D.1	Y7A9D.1	19.4745	2.07787	1.0551	0.412967	2.55493	0.0106208	0.0341876
WBGene00004096	pqm-1	F40F8.7	184.518	2.07558	1.05351	0.126054	8.35763	6.4e-17	3.22e-15
WBGene00009738	hecw-1	F45H7.6	18.8886	2.07507	1.05316	0.395122	2.66541	0.0076894	0.0261612
WBGene00011801	T16G1.7	T16G1.7	361.085	2.07471	1.05291	0.101392	10.3846	2.92e-25	2.95e-23
WBGene00011364	T02B5.3	T02B5.3	145.622	2.07232	1.05125	0.152606	6.88866	5.63e-12	1.51e-10
WBGene00020456	fbxa-60	T12B5.10	142.37	2.07231	1.05124	0.141015	7.45481	9e-14	3e-12
WBGene00017961	nhr-180	F31F4.12	29.1542	2.06858	1.04864	0.314161	3.3379	0.000844137	0.00413725
WBGene00000983	dhs-20	F35B12.2	119.545	2.06645	1.04716	0.178617	5.86258	4.56e-09	7.91e-08
WBGene00017350	F10E7.9	F10E7.9	20.0082	2.05976	1.04248	0.370052	2.81711	0.00484576	0.017934
WBGene00012239	W04A8.4	W04A8.4	42.6802	2.05955	1.04233	0.289803	3.59668	0.000322305	0.00181944
WBGene00012585	lips-15	Y38E10A.7	89.7282	2.05645	1.04016	0.179174	5.80529	6.43e-09	1.07e-07
WBGene00016884	C52E2.5	C52E2.5	38.3094	2.05435	1.03868	0.268483	3.86871	0.000109414	0.000705585
WBGene00017781	F25E2.3	F25E2.3	47.9922	2.05422	1.03859	0.263669	3.93899	8.18e-05	0.000547788
WBGene00077757	E02H4.7	E02H4.7	53.6903	2.05049	1.03597	0.23316	4.44315	8.87e-06	7.84e-05
WBGene00007331	pho-11	C05C10.4	1795.96	2.05021	1.03577	0.0758698	13.652	1.96e-42	7.1e-40
WBGene00015197	B0454.6	B0454.6	42.8582	2.04839	1.03449	0.248943	4.15553	3.25e-05	0.000246002
WBGene00011475	T05D4.2	T05D4.2	43.3197	2.04773	1.03402	0.341492	3.02796	0.00246209	0.0101798
WBGene00022562	ZC204.12	ZC204.12	81.6147	2.04679	1.03337	0.2001	5.16425	2.41e-07	3e-06
WBGene00003634	nhr-44	T19A5.4	19.3029	2.04129	1.02948	0.393098	2.61889	0.00882171	0.0293683
WBGene00015057	gad-3	B0222.9	251.31	2.04025	1.02874	0.1219	8.43923	3.19e-17	1.63e-15
WBGene00008841	F15A4.6	F15A4.6	66.9092	2.03808	1.02721	0.207769	4.94399	7.65e-07	8.59e-06
WBGene00043062	clec-80	Y54G2A.39	137.361	2.03676	1.02628	0.148064	6.93128	4.17e-12	1.14e-10
WBGene00018346	F42C5.4	F42C5.4	28.0145	2.03613	1.02583	0.319691	3.20881	0.00133284	0.00608269
WBGene00011821	cdf-2	T18D3.3	47.5141	2.03475	1.02485	0.252751	4.05479	5.02e-05	0.000354318
WBGene00018976	daam-1	F56E10.2	20.5302	2.02553	1.0183	0.380955	2.67303	0.00751697	0.0256551
WBGene00012140	T28F4.5	T28F4.5	1113.32	2.02204	1.01582	0.0660215	15.3861	2.03e-53	1.4e-50
WBGene00011660	T09E11.11	T09E11.11	18.5128	2.01907	1.01369	0.382462	2.65043	0.00803902	0.027174
WBGene00009221	acs-2	F28F8.2	240.249	2.01837	1.01319	0.350855	2.88776	0.00387992	0.014901
WBGene00018282	F41D9.2	F41D9.2	45.4273	2.01625	1.01167	0.252646	4.00431	6.22e-05	0.000427839
WBGene00000111	alh-5	T08B1.3	76.8112	2.01579	1.01135	0.185153	5.46222	4.7e-08	6.71e-07
WBGene00007139	mnp-1	B0285.7	81.1666	2.01457	1.01047	0.223211	4.52697	5.98e-06	5.52e-05
WBGene00017840	ttm-2	F26G1.4	94.9937	2.01288	1.00926	0.187517	5.38224	7.36e-08	1.01e-06
WBGene00019298	K02D7.1	K02D7.1	512.574	2.01248	1.00897	0.08886	11.3546	7.03e-30	9.88e-28
WBGene00010215	nhr-193	F57G8.6	39.6839	2.01081	1.00778	0.2912	3.46078	0.000538612	0.00283125
WBGene00019404	K05B2.4	K05B2.4	20.7949	2.01061	1.00763	0.3656	2.75611	0.00584941	0.020914
WBGene00000169	aqp-1	F32A5.5	499.196	2.01026	1.00738	0.0868373	11.6008	4.08e-31	6.13e-29
WBGene00017867	slc-28.1	F27E11.1	21.7019	2.00957	1.00689	0.365715	2.7532	0.00590149	0.0210506
WBGene00021371	nape-1	Y37E11AR.4	34.8311	2.00749	1.00539	0.309799	3.24531	0.00117322	0.0054475
WBGene00010453	fozi-1	K01B6.1	63.4504	2.00529	1.00381	0.217949	4.60572	4.11e-06	3.96e-05
WBGene00021396	cutl-24	Y38C1AA.5	21.9192	2.00513	1.00369	0.367486	2.73124	0.00630971	0.0222143
WBGene00012783	Y43C5A.3	Y43C5A.3	52.5094	2.00278	1.00201	0.240705	4.1628	3.14e-05	0.000239834
WBGene00019337	K02F6.3	K02F6.3	27.9558	1.9974	0.998123	0.325002	3.07113	0.00213252	0.00904891
WBGene00017184	ncam-1	F02G3.1	34.8571	1.99734	0.998082	0.326699	3.05505	0.0022502	0.00947144
WBGene00018303	F41G3.10	F41G3.10	94.2316	1.99522	0.996551	0.177839	5.60367	2.1e-08	3.19e-07
WBGene00017198	nhr-36	F07C3.10	27.4945	1.99274	0.994755	0.343155	2.89885	0.00374529	0.0144498
WBGene00043982	B0403.6	B0403.6	18.6468	1.99226	0.994403	0.405747	2.45079	0.0142542	0.0434837
WBGene00018576	F47G3.1	F47G3.1	40.0094	1.99102	0.993505	0.267145	3.71897	0.000200037	0.00119738
WBGene00022144	pghm-1	Y71G12B.4	48.244	1.99094	0.993453	0.248488	3.99798	6.39e-05	0.00043804
WBGene00009358	F33C8.4	F33C8.4	47.2274	1.98879	0.99189	0.28015	3.54057	0.000399268	0.00218481
WBGene00009743	sptf-1	F45H11.1	28.1056	1.9884	0.991605	0.350294	2.83078	0.00464346	0.017315
WBGene00021913	cec-8	Y55B1BR.3	91.6221	1.98405	0.988445	0.229795	4.30142	1.7e-05	0.000138863
WBGene00001459	flp-16	F15D4.8	23.1895	1.98303	0.987705	0.361977	2.72864	0.00635953	0.022343
WBGene00007358	lact-6	C06A12.5	27.6392	1.98258	0.98738	0.371368	2.65876	0.00784279	0.0265936
WBGene00014300	D2023.1	D2023.1	20.107	1.9775	0.983674	0.375021	2.62298	0.00871634	0.0291005
WBGene00007973	C36B1.6	C36B1.6	35.6413	1.97669	0.983089	0.281459	3.49283	0.000477927	0.00255849
WBGene00021576	fbxc-51	Y46B2A.1	74.7958	1.97561	0.982301	0.247286	3.97232	7.12e-05	0.000483442
WBGene00012123	T28D6.3	T28D6.3	32.761	1.97512	0.981938	0.320582	3.06298	0.00219142	0.00925482
WBGene00017980	F32B5.7	F32B5.7	37.9899	1.97234	0.979907	0.277466	3.53162	0.000413019	0.00225032
WBGene00044283	spp-22	ZK867.3	22.3638	1.96963	0.977927	0.355828	2.74831	0.00599028	0.0213122
WBGene00021531	Y42G9A.1	Y42G9A.1	63.526	1.96675	0.97581	0.220449	4.42647	9.58e-06	8.39e-05
WBGene00003096	lys-7	C02A12.4	870.145	1.9658	0.975113	0.125374	7.77762	7.39e-15	2.88e-13
WBGene00007565	clec-48	C14A6.1	192.267	1.96417	0.973918	0.119274	8.16536	3.2e-16	1.47e-14
WBGene00022353	pals-18	Y82E9BR.21	20.6452	1.96335	0.97332	0.386589	2.51771	0.011812	0.0372784
WBGene00019902	R05G6.10	R05G6.10	112.114	1.96329	0.973274	0.166778	5.83574	5.36e-09	9.13e-08
WBGene00004057	pmk-3	F42G8.4	188.724	1.9627	0.97284	0.125357	7.76058	8.45e-15	3.27e-13
WBGene00010485	ant-1.3	K01H12.2	22.3306	1.96062	0.971309	0.365985	2.65396	0.00795526	0.0269449
WBGene00018354	F42G2.5	F42G2.5	20.8487	1.95459	0.966867	0.379822	2.54558	0.0109097	0.0349248
WBGene00009984	F53F1.6	F53F1.6	29.1163	1.95158	0.964639	0.348361	2.76908	0.00562147	0.0202229
WBGene00008593	clec-227	F08H9.5	37.1637	1.95105	0.964252	0.272426	3.5395	0.000400889	0.00219232
WBGene00009962	F53B6.7	F53B6.7	26.3053	1.95054	0.963872	0.343857	2.80312	0.00506103	0.0185992
WBGene00004969	spe-15	F47G6.4	186.613	1.94805	0.962033	0.127395	7.55156	4.3e-14	1.52e-12
WBGene00010822	M01G12.9	M01G12.9	60.4746	1.94554	0.960171	0.222814	4.3093	1.64e-05	0.000134549
WBGene00006765	unc-29	T08G11.5	30.5479	1.94216	0.957666	0.292985	3.26865	0.00108061	0.00510021
WBGene00018200	btb-17	F39E9.11	35.0334	1.94004	0.956088	0.279608	3.41938	0.000627633	0.00323276
WBGene00004007	pgp-13	F22E10.2	32.4863	1.93395	0.951554	0.292802	3.24982	0.00115477	0.00538161
WBGene00010034	F54B11.11	F54B11.11	35.4157	1.93207	0.950146	0.284231	3.34286	0.000829198	0.00407532
WBGene00016455	C35E7.3	C35E7.3	21.23	1.93066	0.949091	0.367707	2.58111	0.00984836	0.0321928
WBGene00022202	Y72A10A.1	Y72A10A.1	18.9948	1.92867	0.947605	0.382652	2.47642	0.0132709	0.0410963
WBGene00000674	col-99	F29C4.8	27.1768	1.92839	0.947398	0.343651	2.75686	0.00583585	0.0208754
WBGene00002259	lbp-7	T22G5.2	105.339	1.9277	0.946879	0.188644	5.01939	5.18e-07	5.99e-06
WBGene00014233	ZK1128.7	ZK1128.7	70.1649	1.92707	0.946407	0.204599	4.62567	3.73e-06	3.64e-05
WBGene00016716	acs-17	C46F4.2	151.727	1.92652	0.945996	0.13887	6.8121	9.62e-12	2.5e-10
WBGene00019963	R08E5.3	R08E5.3	87.4685	1.92565	0.945342	0.186067	5.08066	3.76e-07	4.47e-06
WBGene00003999	pgp-5	C05A9.1	168.642	1.92432	0.944347	0.131703	7.1703	7.48e-13	2.22e-11
WBGene00021336	Y34F4.1	Y34F4.1	63.8003	1.92359	0.943801	0.220546	4.27939	1.87e-05	0.000151534
WBGene00022331	fbxa-19	Y82E9BL.15	21.3095	1.92273	0.943154	0.373634	2.52427	0.0115939	0.0367047
WBGene00012085	T27D12.1	T27D12.1	154.888	1.92229	0.942829	0.135165	6.97539	3.05e-12	8.56e-11
WBGene00004924	snt-4	T23H2.2	45.0986	1.92225	0.942799	0.264293	3.56725	0.00036075	0.00199636
WBGene00011683	phat-6	T10B10.6	18.3604	1.92191	0.94254	0.392705	2.40012	0.0163897	0.0487068
WBGene00017537	F17A9.5	F17A9.5	119.443	1.92124	0.942037	0.152218	6.18874	6.06e-10	1.19e-08
WBGene00013699	Y106G6D.2	Y106G6D.2	37.5803	1.91939	0.940644	0.351718	2.67443	0.00748563	0.0255711
WBGene00011870	T20G5.8	T20G5.8	37.3621	1.91533	0.937591	0.287775	3.25806	0.00112175	0.00526163
WBGene00000981	dhs-18	C45B11.3	315.091	1.9152	0.937498	0.104891	8.93783	3.97e-19	2.35e-17
WBGene00017464	sulp-2	F14D12.5	71.2193	1.91448	0.936956	0.205113	4.568	4.92e-06	4.65e-05
WBGene00044176	C30G7.2	C30G7.2	18.7767	1.91411	0.936676	0.385954	2.42691	0.015228	0.0458654
WBGene00016782	phat-3	C49G7.4	24.2575	1.9127	0.93561	0.337249	2.77424	0.00553309	0.01997
WBGene00007392	fbxa-156	C06H5.1	29.0232	1.91011	0.933652	0.330564	2.82442	0.0047366	0.017603
WBGene00009634	nspc-9	F42F12.1	21.8091	1.90767	0.931813	0.376639	2.47402	0.0133601	0.041311
WBGene00001452	flp-9	C36H8.3	24.7276	1.90522	0.929954	0.336614	2.76267	0.00573305	0.0205814
WBGene00007073	ugt-2	AC3.8	59.8617	1.90483	0.92966	0.218824	4.24843	2.15e-05	0.000171024
WBGene00015756	C14C6.2	C14C6.2	118.328	1.90234	0.927775	0.160079	5.79573	6.8e-09	1.13e-07
WBGene00006809	unc-77	C11D2.6	50.8174	1.90171	0.927295	0.247355	3.74884	0.000177654	0.00107571
WBGene00021048	W05H9.1	W05H9.1	897.409	1.90167	0.927266	0.07135	12.996	1.29e-38	3.56e-36
WBGene00003696	nhr-106	T01G6.4	41.9033	1.89737	0.924004	0.266537	3.4667	0.000526882	0.00277987
WBGene00044330	alr-1	R08B4.2	27.7589	1.89716	0.923843	0.355428	2.59924	0.00934298	0.0308398
WBGene00019435	K06A9.1	K06A9.1	114.277	1.89696	0.923688	0.161131	5.73251	9.9e-09	1.61e-07
WBGene00008599	F09A5.2	F09A5.2	20.4194	1.89639	0.923259	0.366653	2.51807	0.0118	0.0372561
WBGene00017026	ipla-4	D1037.5	23.1062	1.89627	0.923166	0.370474	2.49185	0.0127079	0.0396356
WBGene00009215	thn-2	F28D1.5	494.612	1.89124	0.919334	0.0803222	11.4456	2.47e-30	3.51e-28
WBGene00009504	F37B12.1	F37B12.1	45.6073	1.89118	0.91929	0.254226	3.61603	0.000299154	0.00170589
WBGene00000799	crn-6	K04H4.6	112.218	1.88961	0.91809	0.170358	5.3892	7.08e-08	9.72e-07
WBGene00013119	Y51H4A.25	Y51H4A.25	38.7125	1.88925	0.917813	0.271365	3.3822	0.000719066	0.00361894
WBGene00014057	ZK673.1	ZK673.1	186.283	1.88629	0.915555	0.13673	6.69606	2.14e-11	5.27e-10
WBGene00014562	Y17D7B.7	Y17D7B.7	24.2113	1.88431	0.914035	0.362064	2.52451	0.011586	0.0366934
WBGene00000692	col-118	T11B7.3	235.718	1.88421	0.913958	0.111114	8.2254	1.95e-16	9.22e-15
WBGene00005003	spp-18	F27C8.4	356.145	1.88071	0.911281	0.09563	9.52924	1.58e-21	1.19e-19
WBGene00020735	T23F2.2	T23F2.2	57.4538	1.87721	0.908592	0.226723	4.0075	6.14e-05	0.000422545
WBGene00022505	ZC21.3	ZC21.3	34.5614	1.87673	0.908224	0.288422	3.14894	0.00163862	0.00722802
WBGene00013091	Y51B9A.9	Y51B9A.9	22.7986	1.86944	0.902608	0.353448	2.55373	0.0106577	0.0342846
WBGene00000968	dhs-4	T05F1.10	32.9034	1.86854	0.901908	0.313915	2.8731	0.0040647	0.0155242
WBGene00003707	nhr-117	F16B4.12	41.1469	1.86824	0.901682	0.265869	3.39146	0.000695221	0.00351292
WBGene00044073	tag-244	C34H4.3	53.9402	1.86637	0.900236	0.239468	3.75931	0.000170383	0.00103664
WBGene00007934	C34E7.4	C34E7.4	86.1893	1.86477	0.898996	0.213622	4.20835	2.57e-05	0.000200171
WBGene00007384	swt-3	C06G8.1	42.4194	1.86469	0.898936	0.283461	3.17128	0.00151767	0.00678924
WBGene00011579	T07D4.2	T07D4.2	36.3155	1.86421	0.898565	0.278211	3.2298	0.00123878	0.00570303
WBGene00010811	hmit-1.3	M01F1.5	312.364	1.8635	0.898018	0.110449	8.13061	4.27e-16	1.91e-14
WBGene00018413	cyp-33C4	F44C8.1	25.4837	1.85777	0.893571	0.361491	2.4719	0.0134395	0.0414833
WBGene00008886	F16C3.2	F16C3.2	35.7846	1.85662	0.892679	0.285478	3.12696	0.00176621	0.0077013
WBGene00000212	asm-2	ZK455.4	218.535	1.85626	0.892403	0.115987	7.69402	1.43e-14	5.36e-13
WBGene00000286	cal-2	C18E9.1	29.2026	1.85419	0.890787	0.314892	2.82887	0.00467132	0.0174073
WBGene00000170	aqp-2	C01G6.1	224.303	1.85373	0.890431	0.138119	6.44686	1.14e-10	2.51e-09
WBGene00005643	srp-2	C05E4.1	86.062	1.85359	0.890324	0.188677	4.71878	2.37e-06	2.41e-05
WBGene00008915	F17C11.4	F17C11.4	168.339	1.85242	0.889415	0.129245	6.8816	5.92e-12	1.58e-10
WBGene00008572	F08B12.4	F08B12.4	303.028	1.85203	0.889104	0.104839	8.48069	2.24e-17	1.16e-15
WBGene00004056	pmk-2	F42G8.3	153.428	1.8518	0.888932	0.138652	6.41125	1.44e-10	3.09e-09
WBGene00022743	mlt-7	ZK430.8	233.024	1.84999	0.887515	0.119273	7.44105	9.99e-14	3.31e-12
WBGene00008298	C54D10.3	C54D10.3	193.923	1.84953	0.887156	0.128152	6.92267	4.43e-12	1.21e-10
WBGene00077764	F59C6.16	F59C6.16	68.6976	1.84652	0.884808	0.208693	4.23975	2.24e-05	0.000176977
WBGene00017658	F21C10.9	F21C10.9	109.327	1.84551	0.884021	0.162255	5.44833	5.08e-08	7.19e-07
WBGene00018052	F35F10.1	F35F10.1	44.9826	1.84343	0.882396	0.250681	3.52	0.000431547	0.00233784
WBGene00017582	F18G5.6	F18G5.6	195.099	1.83885	0.878807	0.134762	6.52117	6.98e-11	1.56e-09
WBGene00008296	cdr-2	C54D10.1	125.46	1.83871	0.878693	0.168983	5.19988	1.99e-07	2.51e-06
WBGene00016332	C32F10.4	C32F10.4	244.246	1.83862	0.878627	0.124576	7.05295	1.75e-12	5.02e-11
WBGene00001190	egl-23	Y37A1B.11	25.7518	1.83313	0.874308	0.338957	2.57941	0.00989702	0.032331
WBGene00008476	E03H4.8	E03H4.8	58.7608	1.83233	0.873677	0.219611	3.97829	6.94e-05	0.000472736
WBGene00001172	egl-3	C51E3.7	167.168	1.83183	0.873282	0.131648	6.63347	3.28e-11	7.76e-10
WBGene00019939	lips-17	R07G3.2	35.3013	1.83057	0.872293	0.287357	3.03557	0.00240081	0.00997807
WBGene00017834	F26F12.3	F26F12.3	891.457	1.82988	0.871748	0.0704209	12.3791	3.39e-35	6.68e-33
WBGene00018569	F47F2.1	F47F2.1	33.6356	1.82798	0.870248	0.295565	2.94435	0.0032363	0.0127851
WBGene00016283	zmp-3	C31B8.8	50.485	1.82698	0.869459	0.255937	3.39716	0.000680902	0.00345321
WBGene00019837	R02F2.8	R02F2.8	49.6016	1.82558	0.868352	0.232065	3.74185	0.000182668	0.00110211
WBGene00016719	math-24	C46F9.3	64.1534	1.82369	0.866857	0.215194	4.02826	5.62e-05	0.000392195
WBGene00018907	F55G1.15	F55G1.15	48.4438	1.82084	0.864608	0.240939	3.5885	0.00033259	0.00186777
WBGene00003006	lin-17	Y71F9B.5	68.136	1.81625	0.860963	0.205558	4.18841	2.81e-05	0.000216816
WBGene00017968	skpo-3	F32A5.2	373.85	1.81193	0.857529	0.0889791	9.63742	5.56e-22	4.37e-20
WBGene00014000	ZK550.6	ZK550.6	513.446	1.81115	0.856902	0.0818897	10.4641	1.26e-25	1.31e-23
WBGene00018958	F56C11.6	F56C11.6	61.687	1.81068	0.856535	0.225375	3.80049	0.00014441	0.000898434
WBGene00008707	F11E6.3	F11E6.3	2439.45	1.80846	0.854759	0.08107	10.5435	5.44e-26	5.82e-24
WBGene00007353	C06A1.2	C06A1.2	24.3579	1.80776	0.854204	0.351376	2.43102	0.0150562	0.0454652
WBGene00017429	F13D11.4	F13D11.4	30.1022	1.80511	0.852088	0.304678	2.79669	0.00516297	0.0189123
WBGene00004023	pho-4	T16D1.2	75.4692	1.80368	0.850947	0.191961	4.43291	9.3e-06	8.17e-05
WBGene00007748	C26E1.2	C26E1.2	70.3678	1.80322	0.850576	0.210951	4.0321	5.53e-05	0.000386205
WBGene00009476	F36F2.2	F36F2.2	62.8596	1.80272	0.850177	0.216149	3.93329	8.38e-05	0.000559623
WBGene00015055	pitr-3	B0222.3	45.4841	1.80247	0.849973	0.259534	3.27499	0.00105664	0.00500108
WBGene00010884	M7.8	M7.8	28.045	1.80245	0.849962	0.310019	2.74164	0.00611325	0.0216342
WBGene00019282	mps-2	K01A2.8	28.8435	1.80103	0.848819	0.344109	2.46672	0.0136357	0.0419438
WBGene00045461	C25F9.14	C25F9.14	28.4355	1.79868	0.846935	0.319019	2.65481	0.00793524	0.0268831
WBGene00010595	haao-1	K06A4.5	289.549	1.79736	0.845875	0.104492	8.0951	5.72e-16	2.52e-14
WBGene00011392	sbt-1	T03D8.3	107.411	1.79635	0.845072	0.162748	5.19253	2.07e-07	2.61e-06
WBGene00010124	F55G11.4	F55G11.4	108.71	1.79605	0.844825	0.16296	5.18424	2.17e-07	2.72e-06
WBGene00017964	F31F7.1	F31F7.1	1009.04	1.79521	0.844149	0.061317	13.767	4.03e-43	1.53e-40
WBGene00017071	aagr-1	D2096.3	598.315	1.7927	0.842138	0.0786421	10.7085	9.29e-27	1.08e-24
WBGene00006752	unc-13	ZK524.2	74.9791	1.79216	0.841698	0.196614	4.28095	1.86e-05	0.000150682
WBGene00017054	gstk-2	D2024.7	36.8064	1.79071	0.84053	0.276575	3.03907	0.00237312	0.00988463
WBGene00003710	nhr-120	C25B8.6	44.6379	1.78844	0.8387	0.260552	3.21894	0.00128666	0.00589662
WBGene00019519	K08B5.2	K08B5.2	26.843	1.78322	0.834484	0.319018	2.61579	0.00890209	0.0295969
WBGene00017361	F10E9.12	F10E9.12	66.9117	1.78234	0.83377	0.237964	3.50376	0.000458731	0.00247187
WBGene00020649	sma-10	T21D12.9	260.145	1.78148	0.833077	0.110912	7.51117	5.86e-14	2.01e-12
WBGene00008366	tpra-1	D1046.5	100.022	1.7805	0.832284	0.167122	4.9801	6.36e-07	7.26e-06
WBGene00011262	pho-8	R13H4.3	35.8269	1.78042	0.83222	0.276927	3.0052	0.0026541	0.0108612
WBGene00015609	math-4	C08F1.5	131.876	1.78006	0.831928	0.154214	5.39465	6.87e-08	9.46e-07
WBGene00008831	F14H3.12	F14H3.12	32.8077	1.77722	0.829623	0.294695	2.81519	0.00487477	0.018015
WBGene00001852	hil-1	C30G7.1	71.1661	1.77157	0.825031	0.201999	4.08434	4.42e-05	0.000320304
WBGene00010522	K03A11.5	K03A11.5	36.0221	1.77105	0.824603	0.280174	2.94318	0.00324855	0.0128168
WBGene00012989	Y48C3A.5	Y48C3A.5	41.1018	1.76961	0.823435	0.267829	3.07448	0.0021087	0.00896285
WBGene00019780	M60.4	M60.4	292.646	1.7682	0.82228	0.109319	7.52181	5.4e-14	1.86e-12
WBGene00022123	Y71F9AR.2	Y71F9AR.2	31.9911	1.76803	0.822139	0.299714	2.74308	0.00608664	0.0215791
WBGene00045387	K09H9.8	K09H9.8	43.5906	1.76785	0.822	0.257467	3.19265	0.00140976	0.00637605
WBGene00219316	F21A3.11	F21A3.11	97.2935	1.76715	0.821423	0.185098	4.43776	9.09e-06	8.01e-05
WBGene00017430	bcl-11	F13H6.1	185.25	1.76678	0.821119	0.123924	6.626	3.45e-11	8.14e-10
WBGene00017671	pgal-1	F21F3.1	74.3617	1.76584	0.820356	0.198486	4.13306	3.58e-05	0.00026639
WBGene00020854	T27C4.1	T27C4.1	41.7659	1.76438	0.819163	0.264079	3.10197	0.00192241	0.00830361
WBGene00002067	ifp-1	C43C3.1	67.2433	1.76307	0.818087	0.200579	4.07863	4.53e-05	0.000326102
WBGene00019489	K07E1.1	K07E1.1	199.188	1.76303	0.818055	0.123566	6.62038	3.58e-11	8.43e-10
WBGene00011824	T18D3.7	T18D3.7	60.7874	1.76246	0.817589	0.243223	3.36148	0.000775272	0.00385578
WBGene00001399	fat-7	F10D2.9	256.691	1.76234	0.817493	0.116248	7.03232	2.03e-12	5.79e-11
WBGene00003388	moe-3	F32A11.6	57.2942	1.76079	0.816222	0.223777	3.64748	0.000264829	0.00153145
WBGene00002348	myo-1	R06C7.10	128.218	1.76055	0.816029	0.158896	5.13562	2.81e-07	3.45e-06
WBGene00015052	clec-52	B0218.8	59.8955	1.75832	0.814201	0.232463	3.5025	0.000460922	0.00248103
WBGene00009430	F35E12.6	F35E12.6	325.496	1.75742	0.813455	0.0915543	8.88495	6.4e-19	3.7e-17
WBGene00003688	nhr-98	M02H5.6	27.4725	1.75738	0.813427	0.322219	2.52445	0.0115879	0.0366934
WBGene00007745	C26D10.4	C26D10.4	36.2683	1.75437	0.810955	0.275093	2.94793	0.00319906	0.0126743
WBGene00009723	F45D3.3	F45D3.3	144.329	1.75388	0.810549	0.14336	5.65392	1.57e-08	2.46e-07
WBGene00020448	fbxa-51	T12B5.1	44.9823	1.75318	0.809976	0.251864	3.21592	0.00130026	0.00595176
WBGene00007875	dod-24	C32H11.12	75.6828	1.75169	0.808749	0.194734	4.15309	3.28e-05	0.000247753
WBGene00003640	nhr-50	C06C6.5	24.6378	1.751	0.808179	0.333704	2.42184	0.015442	0.0463809
WBGene00013585	cyp-42A1	Y80D3A.5	28.5334	1.75052	0.807783	0.314618	2.5675	0.0102435	0.0331841
WBGene00010961	nduo-2	MTCE.16	499.882	1.74946	0.806911	0.2442	3.3043	0.000952122	0.00457779
WBGene00023069	rncs-1	F55A4.9	83.2654	1.74935	0.80682	0.209843	3.84488	0.000120612	0.00076833
WBGene00018725	kreg-1	F53A9.2	38.2997	1.74849	0.806111	0.32716	2.46397	0.0137408	0.0422155
WBGene00020740	T23F4.2	T23F4.2	52.5394	1.74747	0.805271	0.239468	3.36275	0.000771702	0.0038418
WBGene00015794	C15F1.1	C15F1.1	86.7159	1.74638	0.804372	0.182011	4.41935	9.9e-06	8.63e-05
WBGene00011003	R04B5.5	R04B5.5	112.379	1.74489	0.803133	0.171114	4.69355	2.69e-06	2.7e-05
WBGene00004310	ras-1	C44C11.1	160.788	1.74231	0.801001	0.137596	5.8214	5.84e-09	9.88e-08
WBGene00044213	Y102A5C.36	Y102A5C.36	50.221	1.74213	0.80085	0.228711	3.50158	0.000462502	0.00248865
WBGene00050943	ZC412.10	ZC412.10	51.7465	1.74207	0.800805	0.243047	3.29486	0.000984697	0.00471499
WBGene00008425	D2045.8	D2045.8	64.4506	1.74128	0.800147	0.22229	3.59956	0.000318752	0.00180273
WBGene00017089	poml-2	E01A2.7	47.5436	1.74104	0.799945	0.251247	3.1839	0.00145306	0.00654265
WBGene00012664	Y39B6A.1	Y39B6A.1	3709.71	1.73993	0.799026	0.208365	3.83474	0.000125697	0.000798379
WBGene00045013	F08A7.1	F08A7.1	57.7384	1.73959	0.798747	0.22436	3.56011	0.000370694	0.00204394
WBGene00007926	C34C12.7	C34C12.7	46.3446	1.73949	0.798662	0.245609	3.25176	0.00114694	0.00535499
WBGene00008042	C40H1.7	C40H1.7	123.061	1.73883	0.798114	0.155725	5.12514	2.97e-07	3.61e-06
WBGene00019547	K09C4.1	K09C4.1	82.0307	1.73861	0.797932	0.191097	4.17554	2.97e-05	0.000228175
WBGene00044743	crb-3	C35B8.4	32.5632	1.73855	0.797883	0.297565	2.68138	0.00733201	0.0251029
WBGene00020052	R13A5.10	R13A5.10	27.1344	1.73829	0.797669	0.31034	2.5703	0.010161	0.0330025
WBGene00018485	F46C8.3	F46C8.3	28.5414	1.7366	0.796266	0.325006	2.45	0.0142855	0.0435453
WBGene00015480	C05D10.4	C05D10.4	76.5909	1.73567	0.795493	0.191838	4.1467	3.37e-05	0.000253508
WBGene00010063	dhrs-4	F54F3.4	192.213	1.73485	0.79481	0.125523	6.33198	2.42e-10	5.03e-09
WBGene00007228	acs-7	C01G6.7	314.624	1.73385	0.793977	0.0996328	7.96903	1.6e-15	6.58e-14
WBGene00022177	Y71H2AM.12	Y71H2AM.12	42.0648	1.73095	0.791562	0.268913	2.94356	0.00324464	0.0128081
WBGene00017151	EGAP9.3	EGAP9.3	35.0824	1.73004	0.790802	0.298666	2.64778	0.00810214	0.0273691
WBGene00077701	poml-3	E01A2.10	57.5076	1.72665	0.787975	0.222645	3.53915	0.000401414	0.00219339
WBGene00013895	ZC434.9	ZC434.9	205.206	1.72663	0.787957	0.126503	6.22877	4.7e-10	9.35e-09
WBGene00019955	R08C7.12	R08C7.12	118.742	1.7262	0.787597	0.166063	4.74276	2.11e-06	2.17e-05
WBGene00014153	vab-23	ZK930.3	30.0134	1.72459	0.786257	0.316537	2.48393	0.012994	0.0403873
WBGene00011090	R07B7.6	R07B7.6	76.2929	1.72425	0.785966	0.196681	3.99615	6.44e-05	0.000441038
WBGene00011554	T07A5.1	T07A5.1	42.0123	1.72412	0.785861	0.266467	2.94918	0.00318615	0.0126302
WBGene00002253	lbp-1	F40F4.3	466.064	1.72176	0.783881	0.0901617	8.69417	3.49e-18	1.92e-16
WBGene00000524	clc-3	ZK563.4	31.822	1.72138	0.78357	0.309319	2.53321	0.0113025	0.0359848
WBGene00018356	islo-1	F42G8.5	60.7115	1.72108	0.783316	0.217015	3.60949	0.000306796	0.00174422
WBGene00021909	Y55B1BL.1	Y55B1BL.1	53.1707	1.72093	0.783185	0.235246	3.32922	0.000870897	0.0042426
WBGene00017900	F28E10.1	F28E10.1	37.5716	1.71874	0.78135	0.274279	2.84874	0.00438925	0.0165138
WBGene00018886	npr-28	F55E10.7	89.8518	1.71785	0.780602	0.200707	3.88925	0.000100553	0.000656254
WBGene00007677	C18D4.8	C18D4.8	40.1254	1.71771	0.780486	0.270574	2.88456	0.00391964	0.0150345
WBGene00017557	nep-11	F18A12.8	48.4447	1.71565	0.778754	0.241243	3.22809	0.0012462	0.00573548
WBGene00000910	daf-14	F01G10.8	107.302	1.71453	0.777816	0.159988	4.86172	1.16e-06	1.26e-05
WBGene00007749	ceh-79	C26E1.3	48.9139	1.71436	0.777673	0.245758	3.16439	0.00155411	0.0069257
WBGene00013499	Y70G10A.3	Y70G10A.3	68.1311	1.71329	0.776765	0.210144	3.69635	0.000218722	0.00129543
WBGene00011436	T04F3.1	T04F3.1	574.774	1.71313	0.776634	0.0771566	10.0657	7.83e-24	7.08e-22
WBGene00003628	nhr-35	C07A12.3	200.763	1.71193	0.775622	0.125064	6.20178	5.58e-10	1.1e-08
WBGene00004221	ptr-6	C54A12.1	29.8222	1.71033	0.774278	0.297936	2.59881	0.00935472	0.0308718
WBGene00020865	T27E4.7	T27E4.7	57.8677	1.70915	0.773283	0.231137	3.34556	0.000821164	0.00404688
WBGene00002055	ifc-1	F37B4.2	338.36	1.7068	0.771291	0.0961703	8.02006	1.06e-15	4.51e-14
WBGene00050904	Y70C5A.3	Y70C5A.3	38.0065	1.70651	0.77105	0.271143	2.8437	0.00445926	0.0167404
WBGene00001059	dpf-6	F44B9.1	29.8879	1.70589	0.770525	0.303297	2.5405	0.0110694	0.0353467
WBGene00017952	F31E3.6	F31E3.6	61.8514	1.70485	0.769644	0.232099	3.31601	0.00091312	0.00441686
WBGene00018971	clec-67	F56D6.2	45.2206	1.70464	0.769465	0.257011	2.9939	0.00275441	0.0111932
WBGene00022633	ZC581.3	ZC581.3	77.3879	1.70463	0.769455	0.18855	4.08091	4.49e-05	0.000323991
WBGene00003515	myo-3	K12F2.1	532.551	1.70437	0.769238	0.0931524	8.25785	1.48e-16	7.12e-15
WBGene00006705	ubc-8	Y94H6A.6	86.7664	1.70346	0.768467	0.1872	4.10506	4.04e-05	0.000296501
WBGene00019022	F58A6.1	F58A6.1	127.604	1.70258	0.767724	0.151176	5.07834	3.81e-07	4.52e-06
WBGene00000784	cpr-4	F44C4.3	2759.01	1.70182	0.76708	0.0412767	18.5838	4.34e-77	8.24e-74
WBGene00016506	abhd-5.1	C37H5.2	40.4452	1.70144	0.766753	0.263324	2.91183	0.00359318	0.0139588
WBGene00023432	K12B6.9	K12B6.9	75.7005	1.70062	0.766064	0.201286	3.80585	0.000141319	0.000881372
WBGene00044500	T19E7.6	T19E7.6	36.333	1.69641	0.762485	0.274051	2.78227	0.00539794	0.0195953
WBGene00013643	Y105C5A.24	Y105C5A.24	128.354	1.69398	0.760416	0.150812	5.04215	4.6e-07	5.37e-06
WBGene00004004	pgp-10	C54D1.1	38.1074	1.69329	0.75983	0.269207	2.82248	0.00476539	0.0177014
WBGene00007751	C26G2.2	C26G2.2	100.15	1.69216	0.758868	0.164504	4.61307	3.97e-06	3.85e-05
WBGene00021469	Y39G10AR.11	Y39G10AR.11	309.797	1.69182	0.758578	0.100541	7.54498	4.52e-14	1.58e-12
WBGene00000367	cca-1	C54D2.5	70.8391	1.6902	0.75719	0.206368	3.66913	0.000243376	0.00142476
WBGene00021895	clec-84	Y54G2A.33	210.414	1.68929	0.756419	0.119081	6.35213	2.12e-10	4.43e-09
WBGene00009271	glna-3	F30F8.2	70.1359	1.68892	0.756104	0.199557	3.7889	0.000151314	0.000937922
WBGene00000963	dhp-1	R06C7.3	128.499	1.68834	0.75561	0.152342	4.95994	7.05e-07	7.98e-06
WBGene00008177	C48D1.1	C48D1.1	45.7082	1.68721	0.754636	0.261981	2.88049	0.00397053	0.0152067
WBGene00011269	R17.3	R17.3	43.8412	1.68666	0.75417	0.260736	2.89247	0.0038223	0.0147095
WBGene00005018	sqt-3	F23H12.4	68.7595	1.6838	0.751719	0.23754	3.1646	0.00155296	0.00692277
WBGene00001592	glc-2	F25F8.2	50.0291	1.68351	0.751473	0.242953	3.09308	0.00198092	0.00851758
WBGene00004316	rbf-1	F37A4.7	47.1161	1.68203	0.750206	0.239278	3.13529	0.00171682	0.00752487
WBGene00019922	fbxc-28	R07C3.6	39.6686	1.68028	0.748697	0.310533	2.411	0.0159087	0.0475567
WBGene00012531	Y32F6B.1	Y32F6B.1	153.112	1.67802	0.746758	0.141776	5.26717	1.39e-07	1.81e-06
WBGene00003678	nhr-88	K08A2.5	245.002	1.67796	0.746711	0.110403	6.76349	1.35e-11	3.44e-10
WBGene00021260	Y22D7AR.6	Y22D7AR.6	66.3498	1.67709	0.745964	0.206189	3.61787	0.000297035	0.00169635
WBGene00018435	btb-9	F45C12.4	63.6208	1.67666	0.745589	0.216942	3.43681	0.000588609	0.00305875
WBGene00010545	cbp-2	K03H1.10	147.177	1.67415	0.743426	0.14079	5.28039	1.29e-07	1.7e-06
WBGene00013477	Y69E1A.5	Y69E1A.5	172.309	1.67376	0.74309	0.140863	5.27525	1.33e-07	1.74e-06
WBGene00009295	fbxa-180	F31E9.1	48.2853	1.67336	0.742746	0.241697	3.07305	0.00211884	0.00900093
WBGene00020135	aakg-4	T01B6.3	92.7229	1.6723	0.741835	0.182086	4.07409	4.62e-05	0.00033126
WBGene00003699	nhr-109	T12C9.5	55.9559	1.67056	0.740335	0.224028	3.30466	0.000950924	0.00457493
WBGene00016757	C49A9.3	C49A9.3	60.6263	1.66889	0.738885	0.216324	3.41565	0.00063631	0.00327079
WBGene00004395	rol-3	C16D9.2	57.2521	1.66841	0.738471	0.222638	3.31692	0.00091016	0.00440394
WBGene00003566	ncx-1	Y113G7A.4	264.816	1.66753	0.73771	0.108803	6.78026	1.2e-11	3.08e-10
WBGene00016269	C30G4.4	C30G4.4	87.0293	1.66719	0.737417	0.18859	3.91017	9.22e-05	0.000608225
WBGene00019368	K03H6.2	K03H6.2	302.042	1.66547	0.735928	0.099565	7.39144	1.45e-13	4.73e-12
WBGene00015336	C02D5.2	C02D5.2	40.1384	1.66543	0.735897	0.273845	2.68728	0.00720368	0.0247529
WBGene00000437	ceh-13	R13A5.5	47.7174	1.6654	0.735866	0.25728	2.86018	0.00423405	0.0160478
WBGene00009642	F42G4.5	F42G4.5	139.018	1.6653	0.735782	0.144842	5.07989	3.78e-07	4.49e-06
WBGene00020917	W01B11.6	W01B11.6	91.1365	1.66516	0.735662	0.178534	4.12058	3.78e-05	0.00027878
WBGene00001591	glc-1	F11A5.10	116.398	1.66407	0.734713	0.164944	4.45431	8.42e-06	7.51e-05
WBGene00017093	E02C12.8	E02C12.8	40.0453	1.66239	0.733258	0.278061	2.63704	0.00836322	0.028076
WBGene00019116	nhr-143	F59E11.11	49.7209	1.66188	0.732814	0.239649	3.05786	0.0022292	0.00938825
WBGene00022538	ZC190.4	ZC190.4	81.0588	1.66118	0.732212	0.186347	3.9293	8.52e-05	0.000567741
WBGene00013904	ugt-6	ZC455.4	43.0737	1.66096	0.732019	0.26427	2.76997	0.00560623	0.0201872
WBGene00015933	C17H12.8	C17H12.8	140.455	1.65993	0.731122	0.149413	4.89329	9.92e-07	1.09e-05
WBGene00009532	ccch-1	F38B7.1	319.799	1.6593	0.730579	0.0968153	7.5461	4.48e-14	1.58e-12
WBGene00009982	F53F1.4	F53F1.4	343.477	1.65817	0.729591	0.104427	6.9866	2.82e-12	7.93e-11
WBGene00007453	fbxa-98	C08F11.5	32.3082	1.6579	0.729355	0.302009	2.41501	0.0157347	0.0471483
WBGene00000036	ace-2	Y44E3A.2	79.4845	1.65778	0.72925	0.185975	3.92124	8.81e-05	0.000584253
WBGene00020015	nhr-210	R11G11.12	45.2882	1.65765	0.72914	0.247925	2.94097	0.00327188	0.0128921
WBGene00012216	W02D9.10	W02D9.10	47.6964	1.65751	0.72902	0.255394	2.85449	0.00431056	0.0162707
WBGene00011330	T01D3.6	T01D3.6	959.746	1.65712	0.728677	0.072393	10.0656	7.84e-24	7.08e-22
WBGene00010001	F53F8.4	F53F8.4	75.9897	1.65702	0.728594	0.200578	3.63247	0.000280716	0.00161287
WBGene00019407	lect-2	K05F1.5	34.2397	1.65692	0.728501	0.29697	2.45311	0.0141625	0.0432659
WBGene00022861	dve-1	ZK1193.5	134.729	1.65676	0.728363	0.144623	5.0363	4.75e-07	5.51e-06
WBGene00006575	tir-1	F13B10.1	150.831	1.65671	0.728317	0.142702	5.10375	3.33e-07	4.01e-06
WBGene00012383	ttr-17	Y5F2A.2	291.861	1.65653	0.728166	0.105342	6.91242	4.76e-12	1.3e-10
WBGene00004013	pha-4	F38A6.1	68.7952	1.65645	0.728091	0.215704	3.37541	0.000737061	0.00369358
WBGene00045366	Y17D7C.3	Y17D7C.3	117.729	1.65584	0.727559	0.165813	4.38782	1.14e-05	9.8e-05
WBGene00008451	E01G6.3	E01G6.3	69.6364	1.6542	0.726131	0.201652	3.6009	0.000317112	0.00179614
WBGene00044253	M117.6	M117.6	43.7758	1.65289	0.724989	0.245862	2.94876	0.00319053	0.0126438
WBGene00022246	acp-7	Y73B6BL.25	78.404	1.65231	0.724481	0.185021	3.91567	9.02e-05	0.000596064
WBGene00004220	ptr-5	C53C11.3	53.2096	1.65215	0.724348	0.235769	3.07228	0.00212431	0.00902162
WBGene00017322	clec-160	F09G8.8	192.655	1.6518	0.72404	0.123657	5.85523	4.76e-09	8.25e-08
WBGene00009877	F49C12.7	F49C12.7	274.787	1.65098	0.723322	0.104276	6.93664	4.02e-12	1.11e-10
WBGene00044468	Y69A2AL.2	Y69A2AL.2	137.07	1.64986	0.722346	0.149122	4.844	1.27e-06	1.37e-05
WBGene00016218	pals-23	C29F9.3	117.933	1.64951	0.722038	0.164318	4.39415	1.11e-05	9.56e-05
WBGene00011668	clec-47	T09F5.9	116.161	1.64939	0.721932	0.163709	4.40986	1.03e-05	8.98e-05
WBGene00002011	hsp-12.2	C14B9.1	85.3556	1.6492	0.721767	0.181505	3.97656	6.99e-05	0.000475757
WBGene00017667	ttr-37	F21E9.3	64.9216	1.64748	0.72026	0.210686	3.41864	0.000629352	0.00324051
WBGene00008621	F09C8.1	F09C8.1	383.428	1.64712	0.719942	0.109813	6.55604	5.53e-11	1.26e-09
WBGene00019273	H43E16.1	H43E16.1	76.6314	1.64711	0.719933	0.198112	3.63398	0.000279085	0.00160556
WBGene00008211	C49F5.7	C49F5.7	217.21	1.64478	0.717896	0.122056	5.88168	4.06e-09	7.12e-08
WBGene00044607	K02A11.4	K02A11.4	87.0476	1.6445	0.717647	0.190619	3.76482	0.000166667	0.00101648
WBGene00017659	F21C10.10	F21C10.10	333.503	1.64295	0.716287	0.236201	3.03253	0.00242516	0.0100572
WBGene00019619	asp-14	K10C2.3	982.664	1.64201	0.71546	0.0650571	10.9974	3.93e-28	4.97e-26
WBGene00021321	Y34B4A.5	Y34B4A.5	80.2791	1.64165	0.715149	0.196943	3.63125	0.000282056	0.00161995
WBGene00000103	akt-2	F28H6.1	123.644	1.64096	0.714541	0.158845	4.49837	6.85e-06	6.26e-05
WBGene00010449	K01A11.1	K01A11.1	43.9773	1.63994	0.713645	0.291696	2.44654	0.0144235	0.0438691
WBGene00008450	E01G6.2	E01G6.2	34.0315	1.63951	0.713266	0.292475	2.43872	0.0147394	0.0446507
WBGene00014947	Y71A12B.14	Y71A12B.14	39.8679	1.63927	0.713057	0.279402	2.55208	0.0107082	0.0344033
WBGene00006788	unc-53	F45E10.1	122.408	1.63868	0.712531	0.150554	4.73274	2.22e-06	2.26e-05
WBGene00017717	F22F4.4	F22F4.4	228.114	1.63825	0.712156	0.117087	6.08227	1.18e-09	2.23e-08
WBGene00018874	tag-234	F55C12.7	117.289	1.63699	0.711044	0.163005	4.36209	1.29e-05	0.0001086
WBGene00008652	F10D11.6	F10D11.6	69.1511	1.63698	0.711033	0.222485	3.19587	0.00139411	0.00631469
WBGene00003617	nhr-18	F44C8.3	37.8637	1.63652	0.710633	0.283386	2.50765	0.0121538	0.0381509
WBGene00008341	ttr-44	C56A3.2	190.645	1.63632	0.710453	0.139598	5.08929	3.59e-07	4.29e-06
WBGene00019204	H14N18.4	H14N18.4	66.0412	1.63572	0.709923	0.218634	3.24708	0.00116595	0.00541962
WBGene00008220	C50B6.7	C50B6.7	505.571	1.63563	0.709842	0.0770317	9.21494	3.11e-20	2.06e-18
WBGene00022196	gpa-17	Y71H2B.7	58.9246	1.6351	0.709382	0.216089	3.28283	0.00102772	0.004884
WBGene00022893	ZK1290.13	ZK1290.13	81.7635	1.63411	0.708505	0.199522	3.551	0.000383763	0.00211063
WBGene00017592	F19C7.2	F19C7.2	79.2118	1.633	0.707528	0.18896	3.74433	0.000180878	0.00109261
WBGene00016093	srsx-34	C25E10.3	49.6441	1.63233	0.706934	0.241173	2.93123	0.00337621	0.0132413
WBGene00003143	max-1	C34B4.1	33.3861	1.63229	0.706896	0.293722	2.40668	0.0160981	0.0480633
WBGene00003686	nhr-96	F44C8.11	39.7493	1.62919	0.704153	0.280931	2.5065	0.0121934	0.0382436
WBGene00019060	acox-3	F58F9.7	440.141	1.62852	0.703561	0.0927523	7.58538	3.32e-14	1.19e-12
WBGene00012970	Y48A6B.9	Y48A6B.9	107.921	1.6277	0.70283	0.165003	4.25949	2.05e-05	0.000163546
WBGene00007904	C33G3.4	C33G3.4	116.098	1.62611	0.701426	0.169	4.15046	3.32e-05	0.000250239
WBGene00006986	zip-1	Y75B8A.35	173.674	1.62568	0.701047	0.129549	5.41143	6.25e-08	8.71e-07
WBGene00020940	W02D7.4	W02D7.4	62.1484	1.62318	0.698826	0.2133	3.27626	0.0010519	0.00498643
WBGene00018473	cima-1	F45E4.11	50.6244	1.62317	0.698813	0.234129	2.98473	0.00283828	0.0114573
WBGene00022590	ZC317.7	ZC317.7	153.306	1.62313	0.698779	0.128731	5.42822	5.69e-08	7.97e-07
WBGene00016191	C28G1.6	C28G1.6	38.013	1.6226	0.698304	0.267342	2.61202	0.00900077	0.0298531
WBGene00000516	cki-1	T05A6.1	51.8023	1.62037	0.696323	0.238725	2.91684	0.00353594	0.0137646
WBGene00012113	T28B8.1	T28B8.1	180.129	1.62031	0.696269	0.132351	5.26078	1.43e-07	1.86e-06
WBGene00013317	Y57G11C.22	Y57G11C.22	58.4193	1.62008	0.696065	0.228151	3.05089	0.00228162	0.00958508
WBGene00018351	F42G2.2	F42G2.2	102.479	1.61942	0.695474	0.165188	4.21021	2.55e-05	0.000199048
WBGene00018225	nep-14	F40B5.1	92.2426	1.61888	0.694997	0.173721	4.00064	6.32e-05	0.000433731
WBGene00003943	pbo-4	K09C8.1	168.756	1.61823	0.694414	0.129645	5.35627	8.5e-08	1.15e-06
WBGene00015220	B0507.3	B0507.3	53.194	1.61802	0.694232	0.242246	2.86582	0.00415935	0.015836
WBGene00019593	K09F6.10	K09F6.10	43.5554	1.61769	0.693938	0.249712	2.77895	0.00545351	0.0197451
WBGene00016335	gba-1	C33C12.3	219.645	1.61637	0.692759	0.116059	5.96904	2.39e-09	4.31e-08
WBGene00019411	K05F1.10	K05F1.10	54.3196	1.61627	0.692671	0.226089	3.06371	0.00218608	0.00923486
WBGene00050957	C10A4.10	C10A4.10	45.41	1.61547	0.69195	0.254675	2.71699	0.00658786	0.0229961
WBGene00043980	F11D5.7	F11D5.7	39.1884	1.61285	0.689614	0.262964	2.62246	0.00872969	0.0291322
WBGene00020862	fip-2	T27E4.4	100.846	1.61283	0.689596	0.175986	3.91848	8.91e-05	0.000590195
WBGene00020981	W03D2.6	W03D2.6	85.7755	1.61175	0.68863	0.190093	3.6226	0.000291656	0.00166878
WBGene00006675	twk-22	T01B4.2	85.1936	1.61105	0.688004	0.182715	3.76545	0.000166248	0.00101433
WBGene00017478	F15A8.6	F15A8.6	49.2488	1.61049	0.687499	0.249788	2.75233	0.00591725	0.021087
WBGene00014052	ZK669.2	ZK669.2	40.8386	1.61008	0.687131	0.261234	2.63033	0.00853031	0.0285674
WBGene00021464	ugt-31	Y39G10AR.6	95.0468	1.60993	0.686998	0.173595	3.95748	7.57e-05	0.000510361
WBGene00003764	nlp-26	Y43F8C.2	49.3744	1.60785	0.685131	0.262198	2.61303	0.00897437	0.0297785
WBGene00015897	nhr-156	C17E7.1	32.7492	1.60778	0.685066	0.282106	2.4284	0.0151657	0.0457322
WBGene00004370	rig-3	C53B7.1	156.328	1.6077	0.684996	0.143655	4.76834	1.86e-06	1.93e-05
WBGene00015131	B0303.11	B0303.11	197.771	1.60503	0.682602	0.118422	5.76415	8.21e-09	1.35e-07
WBGene00019097	F59B1.2	F59B1.2	1179.7	1.60415	0.68181	0.0545576	12.4971	7.74e-36	1.59e-33
WBGene00007260	olrn-1	C02C6.2	39.0884	1.60407	0.681734	0.28464	2.39507	0.016617	0.0491993
WBGene00001395	fat-3	W08D2.4	2530.06	1.60385	0.681538	0.0888915	7.66708	1.76e-14	6.51e-13
WBGene00008492	F01D5.1	F01D5.1	41.6001	1.60194	0.679823	0.269288	2.52452	0.0115856	0.0366934
WBGene00021262	fbxa-74	Y22D7AR.9	88.26	1.60071	0.678713	0.190475	3.56327	0.00036627	0.00202175
WBGene00010150	F56D5.6	F56D5.6	250.409	1.60002	0.678091	0.108845	6.22988	4.67e-10	9.31e-09
WBGene00017445	sid-5	F14B8.2	61.9663	1.59977	0.677868	0.214204	3.16459	0.00155299	0.00692277
WBGene00000768	cor-1	R01H10.3	68.4437	1.59831	0.676544	0.20792	3.25387	0.00113844	0.00532263
WBGene00008097	ugt-15	C44H9.1	59.5782	1.59772	0.676014	0.235505	2.87049	0.00409831	0.0156483
WBGene00003700	nhr-110	Y46H3D.5	55.0269	1.59669	0.675084	0.23067	2.92662	0.00342666	0.0133873
WBGene00008260	C52G5.2	C52G5.2	55.68	1.59665	0.675049	0.230582	2.92758	0.00341609	0.0133597
WBGene00000219	asp-6	F21F8.7	16491.8	1.59574	0.674222	0.0505426	13.3397	1.36e-40	4.21e-38
WBGene00009926	noah-2	F52B11.3	104.362	1.59552	0.674027	0.203836	3.30672	0.000943967	0.00454578
WBGene00004858	sma-4	R12B2.1	166.606	1.59482	0.673391	0.140307	4.79942	1.59e-06	1.67e-05
WBGene00008498	F01D5.8	F01D5.8	51.3295	1.59387	0.672534	0.250744	2.68215	0.0073151	0.0250506
WBGene00008499	cyp-37A1	F01D5.9	188.562	1.59263	0.671415	0.12297	5.46001	4.76e-08	6.77e-07
WBGene00009389	F35B12.10	F35B12.10	107.457	1.59183	0.67069	0.159369	4.20841	2.57e-05	0.000200171
WBGene00016425	C34H4.2	C34H4.2	105.298	1.59144	0.670332	0.170448	3.93277	8.4e-05	0.000560094
WBGene00021369	siah-1	Y37E11AR.2	256.692	1.59024	0.669244	0.115673	5.78566	7.22e-09	1.2e-07
WBGene00018260	cyp-33C7	F41B5.2	44.0831	1.58985	0.668889	0.245312	2.72669	0.00639728	0.0224601
WBGene00008803	lips-10	F14E5.5	55.5887	1.58971	0.668761	0.230779	2.89785	0.00375734	0.0144816
WBGene00009677	F44A6.5	F44A6.5	44.7008	1.58963	0.668688	0.253902	2.63364	0.00844742	0.0283273
WBGene00009562	flp-22	F39H2.1	68.0151	1.5894	0.668478	0.203493	3.28502	0.00101976	0.0048538
WBGene00015823	C16B8.3	C16B8.3	299.448	1.58842	0.667589	0.0995367	6.70696	1.99e-11	4.93e-10
WBGene00019294	K02A6.3	K02A6.3	93.3793	1.58803	0.667236	0.183933	3.62761	0.00028606	0.00163945
WBGene00020813	T25G12.6	T25G12.6	95.4881	1.58774	0.666971	0.181005	3.68482	0.000228862	0.00134812
WBGene00006508	tns-1	M01E11.7	553.297	1.58737	0.66664	0.0712756	9.35299	8.52e-21	6.07e-19
WBGene00020455	fbxa-59	T12B5.8	65.6269	1.58722	0.666498	0.215196	3.09717	0.0019538	0.00841526
WBGene00016219	pals-24	C29F9.4	113.523	1.58702	0.666324	0.163226	4.0822	4.46e-05	0.000322496
WBGene00008395	D1086.8	D1086.8	35.5014	1.58688	0.666195	0.275686	2.4165	0.0156706	0.0469746
WBGene00021879	clec-83	Y54G2A.14	460.44	1.58626	0.665632	0.0892853	7.45511	8.98e-14	3e-12
WBGene00022781	pmt-1	ZK622.3	2661.49	1.58617	0.665548	0.0744333	8.94153	3.84e-19	2.28e-17
WBGene00020378	T09B4.4	T09B4.4	46.2231	1.58616	0.665541	0.250414	2.65776	0.00786612	0.0266608
WBGene00008784	F14B6.3	F14B6.3	51.2241	1.58572	0.665136	0.269366	2.46926	0.0135392	0.041702
WBGene00006602	tps-1	ZK54.2	337.743	1.58565	0.665074	0.107541	6.18438	6.23e-10	1.22e-08
WBGene00013257	Y57A10A.14	Y57A10A.14	49.2261	1.5855	0.664939	0.248728	2.67336	0.0075095	0.0256354
WBGene00004237	ptr-23	ZK270.1	155.041	1.58488	0.66437	0.133203	4.98764	6.11e-07	6.99e-06
WBGene00019960	ztf-16	R08E3.4	52.8083	1.58394	0.663518	0.239049	2.77566	0.00550897	0.0199126
WBGene00018101	math-27	F36H5.2	156.75	1.58384	0.663423	0.136097	4.87465	1.09e-06	1.19e-05
WBGene00021893	ndnf-1	Y54G2A.29	40.0648	1.58304	0.662698	0.271255	2.44309	0.0145623	0.0442201
WBGene00001776	gst-28	Y53F4B.31	86.2644	1.58238	0.6621	0.183231	3.61347	0.000302131	0.00172027
WBGene00022175	Y71H2AM.10	Y71H2AM.10	48.7606	1.57941	0.659388	0.235387	2.8013	0.00508976	0.0186821
WBGene00009781	F46C5.6	F46C5.6	48.4677	1.57937	0.659347	0.250532	2.63178	0.00849377	0.0284639
WBGene00011756	ctg-2	T13H5.2	78.7058	1.57935	0.659328	0.188902	3.49032	0.000482434	0.00257562
WBGene00001099	dsc-4	K02D7.4	946.613	1.57913	0.65913	0.0596729	11.0457	2.3e-28	2.98e-26
WBGene00003753	nlp-15	CC4.2	43.9962	1.57897	0.658984	0.267021	2.46791	0.0135904	0.0418297
WBGene00009192	asah-2	F27E5.1	447.191	1.57886	0.658883	0.080045	8.23141	1.85e-16	8.8e-15
WBGene00006831	unc-104	C52E12.2	129.686	1.57862	0.658663	0.151023	4.36134	1.29e-05	0.000108914
WBGene00019867	R04B3.2	R04B3.2	53.7713	1.57775	0.657867	0.241539	2.72364	0.00645659	0.0226212
WBGene00011737	sqst-1	T12G3.1	388.334	1.57712	0.657291	0.106187	6.18996	6.02e-10	1.18e-08
WBGene00002200	kin-16	M176.7	45.7976	1.57685	0.657042	0.251474	2.61276	0.00898144	0.0297954
WBGene00021533	Y42G9A.3	Y42G9A.3	72.1472	1.57501	0.655363	0.201118	3.25859	0.00111966	0.00525349
WBGene00006762	unc-25	Y37D8A.23	52.4093	1.57477	0.655139	0.23451	2.79365	0.00521166	0.0190497
WBGene00016028	flp-24	C24A1.1	42.7629	1.57147	0.652115	0.255575	2.55156	0.0107241	0.0344471
WBGene00003978	pes-4	Y119D3B.17	176.334	1.57122	0.651883	0.134413	4.84985	1.24e-06	1.33e-05
WBGene00014053	ZK669.3	ZK669.3	46.1008	1.57013	0.650886	0.254023	2.56231	0.0103979	0.0335768
WBGene00016210	C29F5.1	C29F5.1	249.432	1.5691	0.649937	0.109059	5.9595	2.53e-09	4.55e-08
WBGene00019188	H11E01.3	H11E01.3	89.4374	1.56908	0.64992	0.188469	3.44842	0.000563871	0.00294333
WBGene00015472	C05D9.3	C05D9.3	59.8699	1.56818	0.649089	0.228487	2.84081	0.0044999	0.0168763
WBGene00019720	M01H9.4	M01H9.4	45.4202	1.56728	0.648265	0.260297	2.49048	0.0127571	0.0397568
WBGene00008229	C50F4.1	C50F4.1	485.799	1.56726	0.648242	0.0808828	8.01458	1.11e-15	4.7e-14
WBGene00000698	col-124	C24F3.6	14620.2	1.56702	0.648025	0.103656	6.25171	4.06e-10	8.21e-09
WBGene00000240	pah-1	K08F8.4	738.115	1.5669	0.647911	0.0616879	10.5031	8.36e-26	8.81e-24
WBGene00007130	B0272.4	B0272.4	148.955	1.56618	0.647249	0.161483	4.00816	6.12e-05	0.000421957
WBGene00022083	Y69A2AR.12	Y69A2AR.12	47.6841	1.56567	0.646777	0.25181	2.56852	0.0102135	0.0331256
WBGene00009081	F23B12.4	F23B12.4	171.791	1.56543	0.64656	0.131738	4.90793	9.2e-07	1.02e-05
WBGene00017443	F13H8.11	F13H8.11	51.1491	1.56411	0.645337	0.242402	2.66226	0.0077618	0.026378
WBGene00013882	msa-1	ZC410.5	197.116	1.56382	0.645071	0.121699	5.30056	1.15e-07	1.53e-06
WBGene00018594	aman-3	F48C1.1	58.3343	1.56361	0.644877	0.225027	2.86577	0.00415991	0.015836
WBGene00003402	mpk-2	C04G6.1	61.6182	1.56216	0.643538	0.215661	2.98403	0.00284479	0.0114744
WBGene00009142	F26A3.4	F26A3.4	248.867	1.56171	0.643126	0.113066	5.68804	1.29e-08	2.06e-07
WBGene00016768	cyp-33E1	C49C8.4	93.2601	1.56002	0.641563	0.181423	3.53629	0.000405792	0.00221493
WBGene00022490	Y119D3B.13	Y119D3B.13	199.306	1.55909	0.640702	0.124955	5.12748	2.94e-07	3.57e-06
WBGene00002235	kqt-3	Y54G9A.3	62.8431	1.55871	0.640356	0.214646	2.98331	0.00285152	0.0114955
WBGene00016848	klo-1	C50F7.10	116.233	1.55713	0.638886	0.163847	3.89928	9.65e-05	0.000632944
WBGene00017901	igeg-1	F28E10.2	58.9798	1.55666	0.638454	0.219754	2.90532	0.0036688	0.0142161
WBGene00000083	adt-2	F08C6.1	361.139	1.55661	0.638409	0.0968384	6.59251	4.32e-11	9.97e-10
WBGene00000669	col-94	W05B2.1	137.369	1.55638	0.638194	0.154262	4.13707	3.52e-05	0.000262559
WBGene00010850	M04C3.1	M04C3.1	256.537	1.55501	0.636926	0.103706	6.14164	8.17e-10	1.57e-08
WBGene00004810	skr-4	Y60A3A.18	124.059	1.55205	0.634178	0.149801	4.23347	2.3e-05	0.000181011
WBGene00019730	asns-2	M02D8.4	418.967	1.55204	0.634162	0.090661	6.99487	2.66e-12	7.49e-11
WBGene00022131	Y71F9B.13	Y71F9B.13	90.4267	1.55054	0.632771	0.189326	3.34223	0.000831089	0.00408121
WBGene00014826	R13H4.2	R13H4.2	532.982	1.55029	0.632542	0.0746717	8.47098	2.43e-17	1.25e-15
WBGene00019361	K03E5.2	K03E5.2	146.351	1.54984	0.632124	0.142287	4.4426	8.89e-06	7.85e-05
WBGene00045271	F07G6.10	F07G6.10	54.5576	1.54962	0.631915	0.244696	2.58245	0.00981019	0.0321095
WBGene00001644	gly-19	F22D6.12	67.5415	1.54931	0.631624	0.209712	3.01187	0.00259644	0.0106597
WBGene00003604	nhr-5	Y73F8A.21	71.0898	1.5459	0.628451	0.199309	3.15315	0.00161518	0.00714957
WBGene00009361	F33E2.5	F33E2.5	111.78	1.54548	0.62805	0.179729	3.49443	0.000475078	0.00254459
WBGene00006863	gyg-1	F56B6.4	274.479	1.54222	0.625013	0.106477	5.86996	4.36e-09	7.59e-08
WBGene00019779	endu-2	M60.2	1979.94	1.54176	0.624579	0.0425637	14.674	9.46e-49	5.52e-46
WBGene00003517	nac-1	F31F6.6	105.538	1.54148	0.624313	0.165114	3.78111	0.000156133	0.000962682
WBGene00013859	ZC247.1	ZC247.1	108.285	1.53967	0.622619	0.156963	3.96668	7.29e-05	0.00049305
WBGene00021645	Y47G6A.19	Y47G6A.19	250.676	1.53966	0.62261	0.11285	5.51714	3.45e-08	5.02e-07
WBGene00045245	ttr-34	F09A5.9	108.114	1.53701	0.620128	0.166752	3.71886	0.000200121	0.00119741
WBGene00007725	C25F9.5	C25F9.5	95.0162	1.53651	0.619656	0.169391	3.65814	0.000254051	0.00147417
WBGene00016838	C50F2.4	C50F2.4	81.3493	1.53554	0.61875	0.187048	3.30798	0.000939713	0.00452817
WBGene00001184	egl-15	F58A3.2	58.5667	1.53545	0.618659	0.222309	2.78287	0.00538796	0.0195684
WBGene00002263	lea-1	K08H10.1	6347.52	1.53461	0.617868	0.051236	12.0592	1.73e-33	3.06e-31
WBGene00004234	ptr-20	Y53F4B.28	60.2264	1.53287	0.616238	0.231059	2.66702	0.00765272	0.0260481
WBGene00021635	Y47G6A.5	Y47G6A.5	219.097	1.53193	0.615348	0.116712	5.27234	1.35e-07	1.76e-06
WBGene00007103	crm-1	B0024.14	176.168	1.53141	0.614863	0.130481	4.71229	2.45e-06	2.48e-05
WBGene00010628	ceeh-2	K07C5.5	126.831	1.53132	0.614771	0.165705	3.71004	0.000207224	0.00123464
WBGene00006636	tsp-10	T14B4.4	98.5427	1.53001	0.613539	0.178832	3.43081	0.000601776	0.00311784
WBGene00017565	ddo-2	F18E3.7	236.157	1.52994	0.613472	0.108996	5.62839	1.82e-08	2.8e-07
WBGene00014035	seb-2	ZK643.3	51.0868	1.5286	0.612207	0.236172	2.59221	0.00953623	0.0313753
WBGene00020436	T12A2.1	T12A2.1	63.7043	1.52777	0.61143	0.207466	2.94714	0.00320732	0.0126938
WBGene00003659	nhr-69	T23H4.2	190.651	1.52748	0.611157	0.12726	4.80243	1.57e-06	1.65e-05
WBGene00014669	zipt-2.1	C06G8.3	232.258	1.52715	0.610845	0.108106	5.65045	1.6e-08	2.5e-07
WBGene00006585	tni-3	T20B3.2	136.221	1.52503	0.608841	0.149219	4.08018	4.5e-05	0.000324705
WBGene00004108	pqn-18	C34E7.1	116.815	1.52475	0.60857	0.156787	3.88151	0.00010381	0.000674033
WBGene00020453	fbxa-55	T12B5.6	49.9965	1.51878	0.602913	0.235321	2.56209	0.0104045	0.0335909
WBGene00009023	F21G4.1	F21G4.1	68.9672	1.51839	0.602546	0.198106	3.04154	0.00235372	0.00982549
WBGene00019018	abts-3	F57F10.1	58.6255	1.51784	0.602021	0.21545	2.79425	0.00520202	0.019028
WBGene00013639	Y105C5A.15	Y105C5A.15	101.504	1.5178	0.601986	0.16722	3.59995	0.000318277	0.00180139
WBGene00003567	ncx-2	C10G8.5	125.962	1.51757	0.601766	0.154902	3.88483	0.000102403	0.000666323
WBGene00007689	C18E9.9	C18E9.9	196.168	1.51731	0.601518	0.133342	4.51109	6.45e-06	5.92e-05
WBGene00020559	best-17	T19C3.1	49.7398	1.51717	0.601379	0.246825	2.43646	0.0148317	0.0448775
WBGene00016061	hpo-15	C24G6.6	1548.36	1.51674	0.600976	0.105977	5.67081	1.42e-08	2.25e-07
WBGene00001189	egl-21	F01D4.4	268.368	1.51626	0.600516	0.104501	5.7465	9.11e-09	1.49e-07
WBGene00006462	svh-5	C33A11.4	55.8421	1.5161	0.600367	0.236974	2.53347	0.0112938	0.0359649
WBGene00016314	C32D5.6	C32D5.6	197.063	1.51575	0.600032	0.125658	4.77514	1.8e-06	1.87e-05
WBGene00010470	cdr-4	K01D12.11	103.901	1.51489	0.599215	0.173209	3.45949	0.000541201	0.0028406
WBGene00003991	pfn-3	K03E6.6	78.8139	1.51424	0.598598	0.187925	3.1853	0.00144606	0.00651693
WBGene00012134	T28F3.8	T28F3.8	241.787	1.51359	0.597976	0.109479	5.46199	4.71e-08	6.71e-07
WBGene00022797	best-24	ZK688.2	100.259	1.51206	0.596515	0.169227	3.52494	0.000423582	0.00230044
WBGene00044178	C30G7.4	C30G7.4	52.5037	1.5111	0.595595	0.245185	2.42917	0.0151335	0.0456531
WBGene00000002	aat-1	F27C8.1	53.3234	1.51094	0.595448	0.231829	2.56848	0.0102145	0.0331256
WBGene00020732	T23E7.2	T23E7.2	750.246	1.51066	0.595181	0.114763	5.18619	2.15e-07	2.69e-06
WBGene00022129	lron-11	Y71F9B.8	85.2641	1.51044	0.594972	0.192398	3.09241	0.0019854	0.00853004
WBGene00012443	Y15E3A.4	Y15E3A.4	118.651	1.50944	0.594018	0.152794	3.8877	0.000101199	0.000659906
WBGene00020158	T02C5.1	T02C5.1	1420.6	1.50874	0.593347	0.047768	12.4214	2e-35	4.04e-33
WBGene00006787	unc-52	ZC101.2	1562.78	1.50869	0.593296	0.0905631	6.55118	5.71e-11	1.29e-09
WBGene00008644	F10C2.3	F10C2.3	59.815	1.508	0.592633	0.222072	2.66865	0.00761564	0.0259471
WBGene00016379	C33H5.13	C33H5.13	99.0785	1.50702	0.591703	0.17823	3.31988	0.000900553	0.00436303
WBGene00004856	sma-2	ZK370.2	48.9019	1.50654	0.591238	0.238156	2.48257	0.0130438	0.0405173
WBGene00011800	T16G1.6	T16G1.6	109.6	1.50645	0.591156	0.181865	3.25052	0.00115193	0.00537
WBGene00013080	Y51A2D.13	Y51A2D.13	519.212	1.5061	0.590814	0.0795316	7.42867	1.1e-13	3.62e-12
WBGene00021050	W05H9.3	W05H9.3	587.004	1.50541	0.590161	0.081843	7.21089	5.56e-13	1.68e-11
WBGene00019205	kcc-2	H16O14.1	589.941	1.50489	0.589653	0.0830999	7.09571	1.29e-12	3.74e-11
WBGene00000831	ctl-2	Y54G11A.5	632.34	1.50439	0.589174	0.0703878	8.37039	5.74e-17	2.89e-15
WBGene00008127	ddo-1	C47A10.5	77.2771	1.50408	0.588877	0.193107	3.04949	0.00229234	0.00961679
WBGene00010047	F54D1.6	F54D1.6	298.252	1.50348	0.588302	0.101708	5.78424	7.28e-09	1.2e-07
WBGene00019170	H06I04.6	H06I04.6	99.7523	1.50333	0.58816	0.172628	3.4071	0.000656566	0.00336011
WBGene00012487	Y18D10A.23	Y18D10A.23	176.898	1.50296	0.587806	0.121361	4.84344	1.28e-06	1.37e-05
WBGene00019587	K09F6.4	K09F6.4	47.1922	1.50245	0.587316	0.231513	2.53686	0.0111851	0.035671
WBGene00000298	cat-4	F32G8.6	586.981	1.50127	0.586187	0.0725378	8.08112	6.42e-16	2.8e-14
WBGene00010772	K11D9.3	K11D9.3	124.375	1.50108	0.585999	0.15427	3.79853	0.000145556	0.000904817
WBGene00013976	hizr-1	ZK455.6	55.0634	1.50089	0.585821	0.227805	2.57159	0.0101233	0.0329214
WBGene00003725	nhr-135	VC5.5	53.1615	1.50008	0.585039	0.240666	2.43092	0.0150605	0.0454692
WBGene00008779	F14B4.1	F14B4.1	51.4934	1.50162	-0.586519	0.24294	-2.41425	0.0157676	0.0472187
WBGene00010483	K01G12.3	K01G12.3	125.842	1.50452	-0.589303	0.152781	-3.85716	0.000114711	0.000735371
WBGene00008534	F02H6.1	F02H6.1	95.8464	1.51132	-0.595814	0.174	-3.42422	0.000616557	0.00318327
WBGene00004922	snt-2	F42G9.7	503.703	1.52537	-0.609158	0.0825138	-7.3825	1.55e-13	5.05e-12
WBGene00021055	W06A11.4	W06A11.4	77.2828	1.53227	-0.615671	0.200416	-3.07197	0.0021265	0.00902588
WBGene00015037	B0212.3	B0212.3	281.296	1.53417	-0.617456	0.108254	-5.70377	1.17e-08	1.89e-07
WBGene00015111	B0281.4	B0281.4	51.171	1.53784	-0.620907	0.244087	-2.54379	0.0109658	0.03506
WBGene00016823	C50E3.12	C50E3.12	403.283	1.5476	-0.630037	0.0859586	-7.32954	2.31e-13	7.35e-12
WBGene00219374	C25A11.10	C25A11.10	227.663	1.56911	-0.649943	0.120419	-5.39736	6.76e-08	9.34e-07
WBGene00020988	W03D8.7	W03D8.7	45.4897	1.5756	-0.655898	0.250593	-2.61738	0.0088607	0.0294821
WBGene00010294	fbxa-129	F59A1.8	104.506	1.57747	-0.657609	0.158961	-4.13691	3.52e-05	0.000262606
WBGene00015861	C16D9.6	C16D9.6	55.8501	1.63281	-0.707355	0.258348	-2.73799	0.00618151	0.0218186
WBGene00010953	clec-190	M199.4	115.794	1.633	-0.707523	0.160322	-4.41312	1.02e-05	8.86e-05
WBGene00020502	T14B4.8	T14B4.8	50.5048	1.64707	-0.719898	0.240912	-2.98823	0.00280602	0.0113482
WBGene00206380	C42D4.18	C42D4.18	36.2545	1.64775	-0.720497	0.290887	-2.47689	0.0132531	0.0410715
WBGene00017583	F19B10.1	F19B10.1	173.352	1.67123	-0.74091	0.128198	-5.77943	7.5e-09	1.23e-07
WBGene00009310	F32A11.5	F32A11.5	50.3967	1.67261	-0.742099	0.23587	-3.14622	0.00165398	0.00728306
WBGene00000373	cyp-14A5	F08F3.7	126.413	1.70141	-0.766732	0.149119	-5.14176	2.72e-07	3.35e-06
WBGene00044638	F23A7.8	F23A7.8	916.445	1.81285	-0.858263	0.0596242	-14.3945	5.6e-47	2.93e-44
WBGene00021853	Y54F10AM.11	Y54F10AM.11	540.366	1.81488	-0.859878	0.0766673	-11.2157	3.41e-29	4.59e-27
WBGene00012198	W02B8.2	W02B8.2	1014.31	1.85549	-0.8918	0.0558464	-15.9688	2.11e-57	1.88e-54
WBGene00015559	npr-17	C06G4.5	30.7651	1.87398	-0.906106	0.296915	-3.05173	0.00227526	0.009561
WBGene00011680	T10B10.3	T10B10.3	914.937	1.88393	-0.913743	0.0631237	-14.4754	1.73e-47	9.39e-45
WBGene00007925	C34C12.6	C34C12.6	33.7633	1.95402	-0.966445	0.288734	-3.34718	0.000816367	0.00402847
WBGene00219609	linc-7	T22E6.2	684.072	1.96934	-0.977711	0.0699326	-13.9807	2.04e-44	8.38e-42
WBGene00011107	R07E3.6	R07E3.6	20.3768	1.97165	-0.9794	0.394478	-2.48278	0.0130362	0.0405051
WBGene00003019	lin-33	H32C10.2	100.457	2.05077	-1.03616	0.163303	-6.34503	2.22e-10	4.64e-09
WBGene00020408	T10D4.6	T10D4.6	566.834	2.11128	-1.07812	0.0797796	-13.5137	1.3e-41	4.28e-39
WBGene00016086	C25A11.1	C25A11.1	76.2807	2.12454	-1.08715	0.206701	-5.25953	1.44e-07	1.87e-06
WBGene00012492	fbxb-7	Y20C6A.2	121.347	2.15802	-1.10971	0.159982	-6.93644	4.02e-12	1.11e-10
WBGene00012185	W01F3.2	W01F3.2	297.889	2.17827	-1.12318	0.0980149	-11.4593	2.11e-30	3.02e-28
WBGene00020183	T03D3.5	T03D3.5	279.575	2.20899	-1.14339	0.108351	-10.5527	4.94e-26	5.35e-24
WBGene00020235	T05A12.4	T05A12.4	1329.92	2.23628	-1.1611	0.0492593	-23.5711	7.62e-123	1.93e-119
WBGene00004747	sdc-3	C25D7.3	741.804	2.28264	-1.1907	0.0647352	-18.3934	1.48e-75	2.25e-72
WBGene00044989	Y37A1B.17	Y37A1B.17	1247.76	2.3129	-1.2097	0.0488813	-24.7477	3.28e-135	1.24e-131
WBGene00017796	F25G6.1	F25G6.1	87.9479	2.35149	-1.23358	0.211546	-5.83125	5.5e-09	9.36e-08
WBGene00001387	far-3	F15B9.1	113.905	2.35541	-1.23598	0.179126	-6.90006	5.2e-12	1.41e-10
WBGene00219886	F09E10.15	F09E10.15	40.6567	2.36328	-1.24079	0.276894	-4.4811	7.43e-06	6.71e-05
WBGene00010061	F54E12.2	F54E12.2	5527.59	2.40483	-1.26594	0.0286706	-44.1545	0	0
WBGene00021797	plep-1	Y52E8A.4	47.0479	2.46688	-1.30268	0.25748	-5.05937	4.21e-07	4.96e-06
WBGene00008048	hpo-41	C40H5.6	13.0171	2.6408	-1.40098	0.50328	-2.78369	0.00537441	0.0195338
WBGene00019047	F58E2.3	F58E2.3	27.2019	3.01266	-1.59104	0.33162	-4.79777	1.6e-06	1.68e-05
WBGene00044901	Y41G9A.10	Y41G9A.10	35.0856	3.08244	-1.62407	0.284962	-5.69926	1.2e-08	1.94e-07
WBGene00004054	AC8.1	AC8.1	12.0601	3.23349	-1.69309	0.573117	-2.95418	0.00313497	0.0124594
WBGene00017714	F22F1.2	F22F1.2	12.5381	3.60799	-1.85119	0.509482	-3.63348	0.00027962	0.00160779
WBGene00194708	Y36E3A.2	Y36E3A.2	6.52152	3.62119	-1.85646	0.69055	-2.68839	0.00717985	0.0246877
WBGene00007131	pals-26	B0284.1	9.0887	3.70311	-1.88874	0.593329	-3.18329	0.00145612	0.00655059
WBGene00010209	fbxa-191	F57G4.4	27.7725	3.97234	-1.98999	0.331618	-6.00085	1.96e-09	3.6e-08
WBGene00021529	Y41G9A.5	Y41G9A.5	11.5631	4.193	-2.06798	0.5313	-3.89231	9.93e-05	0.000649432
WBGene00011606	T08D2.1	T08D2.1	26.2377	4.34758	-2.12021	0.418174	-5.07017	3.97e-07	4.7e-06
WBGene00022211	Y73B3A.9	Y73B3A.9	523.676	4.4526	-2.15465	0.0906533	-23.768	7.16e-125	2.17e-121
WBGene00010212	fbxa-192	F57G4.8	84.9813	5.54665	-2.47162	0.202199	-12.2237	2.32e-34	4.41e-32
WBGene00044700	T08D2.9	T08D2.9	30.9737	6.03199	-2.59263	0.373697	-6.9378	3.98e-12	1.1e-10
WBGene00011607	T08D2.2	T08D2.2	39.3207	6.79221	-2.76388	0.370143	-7.46705	8.2e-14	2.76e-12
WBGene00022227	Y73B3B.5	Y73B3B.5	120.378	7.3513	-2.878	0.212497	-13.5437	8.63e-42	2.98e-39
WBGene00010295	fbxa-193	F59A1.9	95.4322	7.43613	-2.89455	0.199106	-14.5377	6.99e-48	3.93e-45
WBGene00011608	T08D2.3	T08D2.3	54.0245	8.48981	-3.08573	0.326086	-9.46294	2.99e-21	2.21e-19
WBGene00011613	T08D2.8	T08D2.8	98.701	10.1676	-3.34591	0.258249	-12.9561	2.17e-38	5.68e-36
WBGene00011611	T08D2.6	T08D2.6	82.0836	10.1921	-3.34939	0.291406	-11.4939	1.42e-30	2.07e-28
WBGene00011612	T08D2.7	T08D2.7	49.725	10.8263	-3.43647	0.380054	-9.04207	1.54e-19	9.56e-18
WBGene00020613	T20D4.7	T20D4.7	12.2187	13.0693	-3.70811	0.645267	-5.74664	9.1e-09	1.49e-07
WBGene00022189	Y71H2AR.2	Y71H2AR.2	1.79518	14.8243	-3.88989	1.57869	-2.464	0.0137394	0.0422155
WBGene00011610	T08D2.5	T08D2.5	13.2154	14.9004	-3.89728	0.818618	-4.76081	1.93e-06	2e-05
WBGene00021342	Y35H6.3	Y35H6.3	92.2368	15.5621	-3.95997	0.30987	-12.7794	2.14e-37	4.91e-35
WBGene00008350	CE7X_3.2	CE7X_3.2	4.24506	17.828	-4.15607	1.36676	-3.04082	0.00235931	0.00984063
WBGene00022219	Y73B3A.18	Y73B3A.18	111.62	25.2861	-4.66027	0.34917	-13.3467	1.24e-40	3.93e-38
WBGene00022223	Y73B3B.1	Y73B3B.1	2.38822	25.4298	-4.66845	1.4799	-3.15458	0.00160729	0.00712296
WBGene00044379	F40H7.12	F40H7.12	10.6852	48.9337	-5.61276	1.11052	-5.05415	4.32e-07	5.08e-06
WBGene00022203	Y73B3A.1	Y73B3A.1	754.192	86.0324	-6.42681	0.231755	-27.731	2.95e-169	1.49e-165
WBGene00022222	Y73B3A.21	Y73B3A.21	41.6959	100.223	-6.64707	1.04278	-6.37439	1.84e-10	3.87e-09
WBGene00022205	Y73B3A.3	Y73B3A.3	79.824	129.577	-7.01766	0.847005	-8.28526	1.18e-16	5.75e-15
WBGene00206482	B0416.10	B0416.10	26.4935	254.472	-7.99136	1.20975	-6.6058	3.95e-11	9.2e-10
WBGene00008349	CE7X_3.1	CE7X_3.1	31.5849	268.273	-8.06756	1.20388	-6.70128	2.07e-11	5.1e-10
WBGene00022221	Y73B3A.20	Y73B3A.20	56.84	478.659	-8.90285	1.19284	-7.46358	8.42e-14	2.83e-12
WBGene00015180	B0416.4	B0416.4	126.416	556.144	-9.11931	1.18699	-7.68272	1.56e-14	5.81e-13
WBGene00022206	Y73B3A.4	Y73B3A.4	262.663	645.857	-9.33507	1.02407	-9.1157	7.82e-20	5e-18
